# Supplementary material for: Transition metal-free α-Csp3–H oxidative sulfuration of benzyl thiosulfates with anilines to form N-aryl thioamides
Source: Royal Society of Chemistry journal article supplement (doi:10.1039/c9ob00336c), 2019-01-01
Supplement: c9ob00336c1.pdf [file c9ob00336c1.pdf]

## *Supporting Information*

# **Transition metal-free $\alpha$ -Csp<sup>3</sup>-H oxidative sulfuration of benzyl thiosulfates with anilines to form N-aryl thioamides**

Mengjun Qiao<sup>[a]</sup>, Jinli Zhang<sup>\*[a,b]</sup>, Ling Chen<sup>[a]</sup>, Fengyi Zhou<sup>[b]</sup>, Yali Zhang<sup>[b]</sup>, Lingfei Zhou<sup>[b]</sup>, Yangjie Wu<sup>[a,b]</sup>

[a] Henan Key Laboratory of Chemical Biology and Organic Chemistry; Key Laboratory of Applied Chemistry of Henan Universities, Zhengzhou University, Zhengzhou, 450052, P.R. China

[b] College of Chemistry and Molecular Engineering, Zhengzhou University, Zhengzhou 450001, P. R. China

E-mail: [jinli@zzu.edu.cn](mailto:jinli@zzu.edu.cn)

## Table of Contents

|                                                                                    |    |
|------------------------------------------------------------------------------------|----|
| 1. General Information.....                                                        | 2  |
| 2. General procedure for Bunte salts synthesis.....                                | 2  |
| 3 General procedure for N-aryl aryl thioamides synthesis .....                     | 2  |
| 4. The Single Crystal X-ray Diffraction Study of 3af, 3ea and intermediate VI..... | 3  |
| 4.1 The Single Crystal X-ray Diffraction Study of 3af.....                         | 3  |
| 4.2The Single Crystal X-ray Diffraction Study of 3ea.....                          | 4  |
| 4.3 The Single Crystal X-ray Diffraction Study of intermediate VI.....             | 5  |
| 5. The experiment of trapping the intermediate V <sup>'</sup> .....                | 6  |
| 6. Exploring the mechanism by tracking experiments .....                           | 7  |
| 6.1Nuclear magnetic tracking results .....                                         | 8  |
| 6.2 Mass spectrometry tracking results.....                                        | 9  |
| 7. Characterization data of products .....                                         | 11 |
| 8. NMR spectra.....                                                                | 23 |
| 9. References.....                                                                 | 93 |

## 1. General Information

$^1\text{H}$  NMR,  $^{13}\text{C}$  NMR and  $^{19}\text{F}$  NMR were recorded in  $\text{CDCl}_3$  or  $\text{DMSO-d}_6$  at room temperature on the Bruker DPX-400 spectrometer (400 MHz, 100 MHz and 377 MHz). The chemical-shifts scale is based on internal TMS. For spectra, chemical shifts were reported in ppm ( $\delta$ ), multiplicity (s = singlet, d = doublet, t = triplet, q = quartet, m = multiplet) and coupling constant (Hz). Melting points were measured using a WC-1 microscopic apparatus and are uncorrected. High resolution mass spectra were ensured on a MALDI-FTMS. The structures of known compounds were further corroborated by comparing their  $^1\text{H}$  NMR,  $^{13}\text{C}$  NMR data and MS data with those of literature.

All reactions were monitored and post-processing by TLC with Qingdao GF254 silica gel coated plates. Most reagents were obtained from commercial suppliers such as J&K Scientific and used without further purification unless otherwise noted.

## 2. General procedure for Bunte salts synthesis

A flask was charged with aryl halides (21.2 mmol, 1.0 eq), anhydrate sodium thiosulfate (31.8 mmol, 1.5 eq) and  $\text{CuI}$  (2.12 mmol, 10 mmol%). The flask was evacuated and filled with nitrogen.  $\text{DMSO}$  (21 mL) was charged via syringe followed by  $\text{DMEDA}$  (0.46 mL, 4.24 mmol, 20 mmol%). The mixture was heated at  $80\text{ }^\circ\text{C}$  for 3 h. Then the reaction mixture was cooled to room temperature which followed by crystallization on addition of saturate aqueous  $\text{NaCl}$  (60 mL). The mixture was filtered and the solid was washed with saturate aqueous  $\text{NaCl}$  and hexanes. The solid was dissolved in 50 mL  $\text{MeOH}$  and stirred for 1 h at room temperature. The mixture was filtered and the filtrate was concentrated on arotovap at  $40\text{--}45\text{ }^\circ\text{C}$ . The resulted solid was dried under vacuum<sup>[1]</sup>.

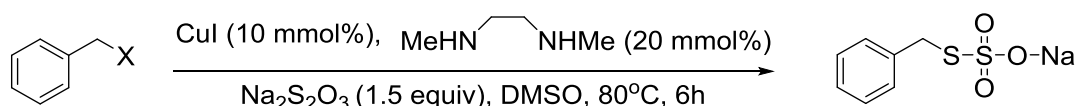

## 3. General procedure for N-aryl aryl thioamides synthesis

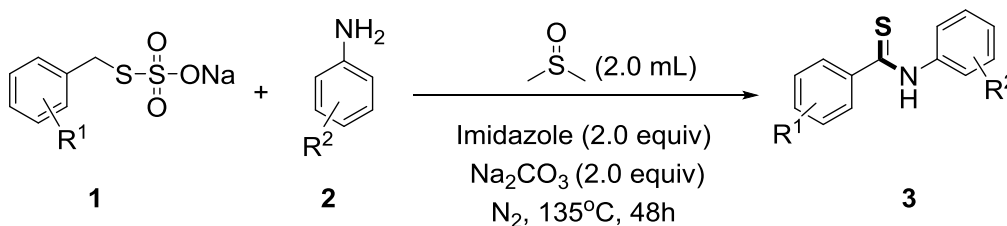

To a solution of the Bunte salts (0.75 mmol) in Dimethyl sulfoxide (2.0 mL) was added aniline (0.25 mmol), imidazole (34 mg, 0.5 mmol), and Na<sub>2</sub>CO<sub>3</sub> (53 mg, 0.50 mmol) under nitrogen atmosphere in a screw-cap Schlenk test tube. The reaction mixture was stirred at 135 °C for 48 h. After the reaction was finished, the reaction mixture was cooled to room temperature and quenched with water. The mixture was extracted with dichloromethane (3.0 mL × 3), the combined organic phases were dried over anhydrous Na<sub>2</sub>SO<sub>4</sub> and the solvent was evaporated under vacuum. The residue was purified by column chromatography to give the corresponding products (Petroleum ether / dichloromethane = 3:2-1:1; Petroleum ether / ethyl acetate = 4:1-7:1) (42%-99 %).

## 4. The Single Crystal X-ray Diffraction Study of 3af, 3ea and intermediate VI

### 4.1 The Single Crystal X-ray Diffraction Study of 3af

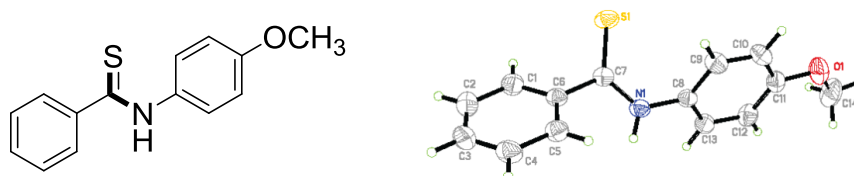

CCDC 1838715 (**3af**) contains the supplementary crystallographic data for this paper. These data can be obtained free of charge from The Cambridge Crystallographic Data Centre *via* [www.ccdc.cam.ac.uk/data\\_request/cif](http://www.ccdc.cam.ac.uk/data_request/cif).

|                                    |                                     |
|------------------------------------|-------------------------------------|
| Identification code                | 201711223_twin1_hklf4               |
| Empirical formula                  | C <sub>14</sub> H <sub>13</sub> NOS |
| Formula weight                     | 243.31                              |
| Temperature/K                      | 293(2)                              |
| Crystal system                     | monoclinic                          |
| Space group                        | P2 <sub>1</sub> /c                  |
| a/Å                                | 12.4136(14)                         |
| b/Å                                | 12.9765(11)                         |
| c/Å                                | 8.1286(6)                           |
| α/°                                | 90                                  |
| β/°                                | 107.035(10)                         |
| γ/°                                | 90                                  |
| Volume/Å <sup>3</sup>              | 1251.9(2)                           |
| Z                                  | 4                                   |
| ρ <sub>calc</sub> /cm <sup>3</sup> | 1.291                               |
| μ/mm <sup>-1</sup>                 | 2.145                               |
| F(000)                             | 512.0                               |

|                                             |                                                          |
|---------------------------------------------|----------------------------------------------------------|
| Crystal size/mm <sup>3</sup>                | 0.28 × 0.12 × 0.09                                       |
| Radiation                                   | CuKα (λ = 1.54184)                                       |
| 2θ range for data collection/°              | 7.448 to 134.312                                         |
| Index ranges                                | -14 ≤ h ≤ 14, -15 ≤ k ≤ 15, -6 ≤ l ≤ 9                   |
| Reflections collected                       | 3928                                                     |
| Independent reflections                     | 3928 [R <sub>int</sub> = ?, R <sub>sigma</sub> = 0.0428] |
| Data/restraints/parameters                  | 3928/0/156                                               |
| Goodness-of-fit on F <sup>2</sup>           | 1.004                                                    |
| Final R indexes [I ≥ 2σ (I)]                | R <sub>1</sub> = 0.0431, wR <sub>2</sub> = 0.0969        |
| Final R indexes [all data]                  | R <sub>1</sub> = 0.0652, wR <sub>2</sub> = 0.1015        |
| Largest diff. peak/hole / e Å <sup>-3</sup> | 0.29/-0.15                                               |

## 4.2 The Single Crystal X-ray Diffraction Study of 3ea

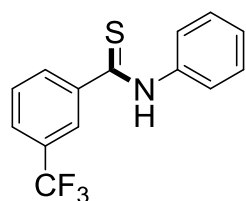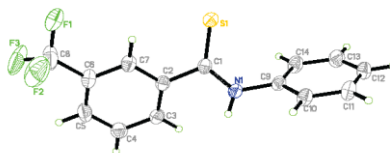

CCDC 1838811 (**3ea**) contains the supplementary crystallographic data for this paper. These data can be obtained free of charge from The Cambridge Crystallographic Data Centre *via* [www.ccdc.cam.ac.uk/data\\_request/cif](http://www.ccdc.cam.ac.uk/data_request/cif).

|                                    |                                                   |
|------------------------------------|---------------------------------------------------|
| Identification code                | 201803177                                         |
| Empirical formula                  | C <sub>14</sub> H <sub>10</sub> F <sub>3</sub> NS |
| Formula weight                     | 281.29                                            |
| Temperature/K                      | 293(2)                                            |
| Crystal system                     | monoclinic                                        |
| Space group                        | P2 <sub>1</sub> /c                                |
| a/Å                                | 13.5721(6)                                        |
| b/Å                                | 12.8938(8)                                        |
| c/Å                                | 7.9189(4)                                         |
| α/°                                | 90                                                |
| β/°                                | 106.101(5)                                        |
| γ/°                                | 90                                                |
| Volume/Å <sup>3</sup>              | 1331.42(13)                                       |
| Z                                  | 4                                                 |
| ρ <sub>calc</sub> /cm <sup>3</sup> | 1.403                                             |
| μ/mm <sup>-1</sup>                 | 2.374                                             |
| F(000)                             | 576.0                                             |
| Crystal size/mm <sup>3</sup>       | 0.19 × 0.13 × 0.07                                |

|                                                  |                                                               |
|--------------------------------------------------|---------------------------------------------------------------|
| Radiation                                        | CuK $\alpha$ ( $\lambda = 1.54184$ )                          |
| 2 $\theta$ range for data collection/ $^{\circ}$ | 6.778 to 134.15                                               |
| Index ranges                                     | $-16 \leq h \leq 10, -12 \leq k \leq 15, -8 \leq l \leq 9$    |
| Reflections collected                            | 4928                                                          |
| Independent reflections                          | 2380 [ $R_{\text{int}} = 0.0290, R_{\text{sigma}} = 0.0392$ ] |
| Data/restraints/parameters                       | 2380/42/186                                                   |
| Goodness-of-fit on $F^2$                         | 1.047                                                         |
| Final R indexes [ $I \geq 2\sigma(I)$ ]          | $R_1 = 0.0610, wR_2 = 0.1697$                                 |
| Final R indexes [all data]                       | $R_1 = 0.0764, wR_2 = 0.1865$                                 |
| Largest diff. peak/hole / e $\text{\AA}^{-3}$    | 0.40/-0.28                                                    |

### 4.3 The Single Crystal X-ray Diffraction Study of intermediate VI

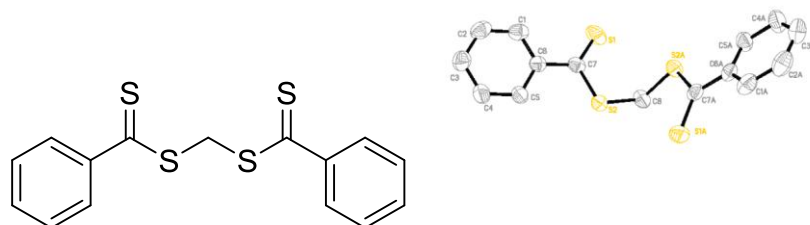

CCDC 1865343(VI) contains the supplementary crystallographic data for this paper. These data can be obtained free of charge from The Cambridge Crystallographic Data Centre *via* [www.ccdc.cam.ac.uk/data\\_request/cif](http://www.ccdc.cam.ac.uk/data_request/cif).

|                     |                   |
|---------------------|-------------------|
| Identification code | 201806280         |
| Empirical formula   | $C_{15}H_{12}S_4$ |
| Formula weight      | 320.49            |
| Temperature/K       | 293(2)            |
| Crystal system      | orthorhombic      |
| Space group         | $P2_12_12$        |
| a/ $\text{\AA}$     | 14.6712(15)       |
| b/ $\text{\AA}$     | 11.6039(10)       |
| c/ $\text{\AA}$     | 4.3268(5)         |
| $\alpha/^\circ$     | 90                |
| $\beta/^\circ$      | 90                |

|                                               |                                                               |
|-----------------------------------------------|---------------------------------------------------------------|
| $\gamma/^\circ$                               | 90                                                            |
| Volume/ $\text{\AA}^3$                        | 736.61(13)                                                    |
| Z                                             | 2                                                             |
| $\rho_{\text{calc}}/\text{g}/\text{cm}^3$     | 1.445                                                         |
| $\mu/\text{mm}^{-1}$                          | 5.766                                                         |
| F(000)                                        | 332.0                                                         |
| Crystal size/ $\text{mm}^3$                   | $0.25 \times 0.15 \times 0.13$                                |
| Radiation                                     | CuK $\alpha$ ( $\lambda = 1.54184$ )                          |
| $2\Theta$ range for data collection/ $^\circ$ | 9.718 to 134.006                                              |
| Index ranges                                  | $-14 \leq h \leq 17, -12 \leq k \leq 13, -2 \leq l \leq 5$    |
| Reflections collected                         | 1698                                                          |
| Independent reflections                       | 1136 [ $R_{\text{int}} = 0.0322, R_{\text{sigma}} = 0.0489$ ] |
| Data/restraints/parameters                    | 1136/0/75                                                     |
| Goodness-of-fit on $F^2$                      | 1.081                                                         |
| Final R indexes [ $I \geq 2\sigma(I)$ ]       | $R_1 = 0.0569, wR_2 = 0.1594$                                 |
| Final R indexes [all data]                    | $R_1 = 0.0646, wR_2 = 0.1709$                                 |
| Largest diff. peak/hole / $e \text{\AA}^{-3}$ | 0.32/-0.34                                                    |
| Flack parameter                               | 0.00(5)                                                       |

## 5. The experiment of trapping the intermediate $V'$

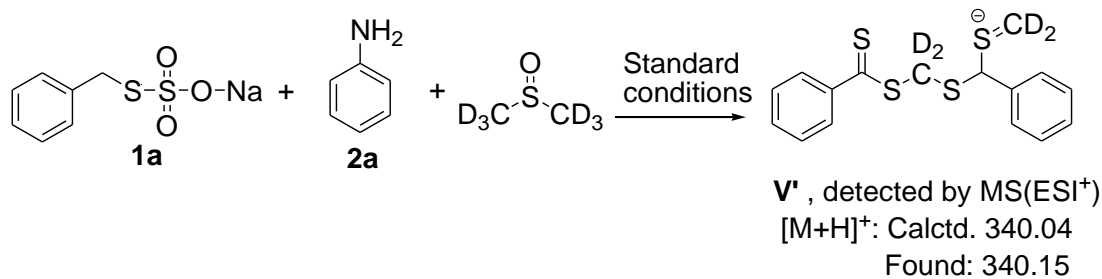

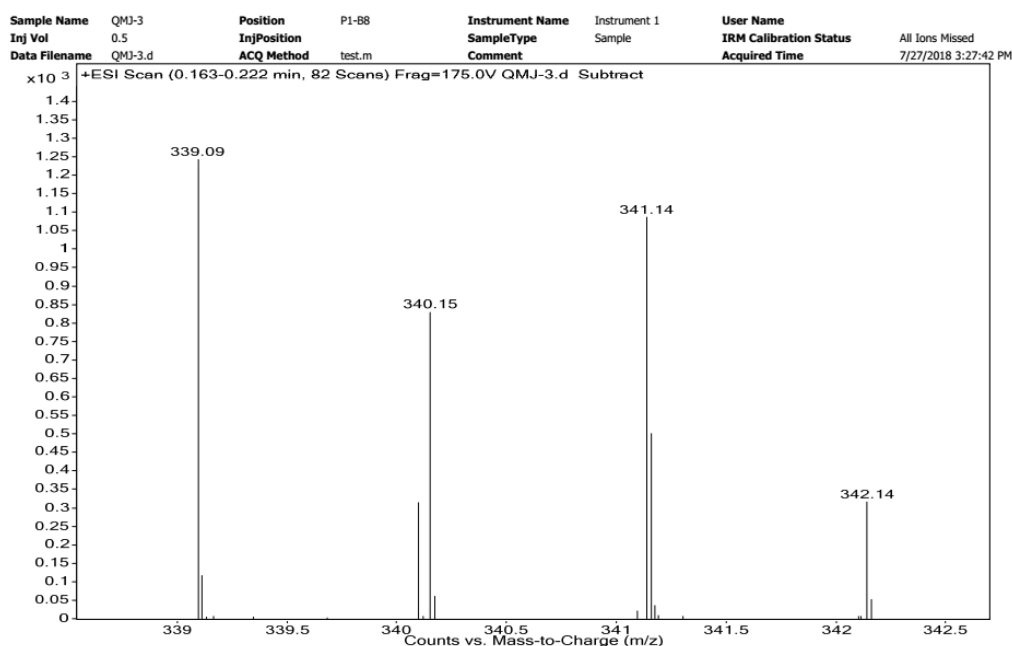

## 6. Exploring the mechanism by tracking experiments

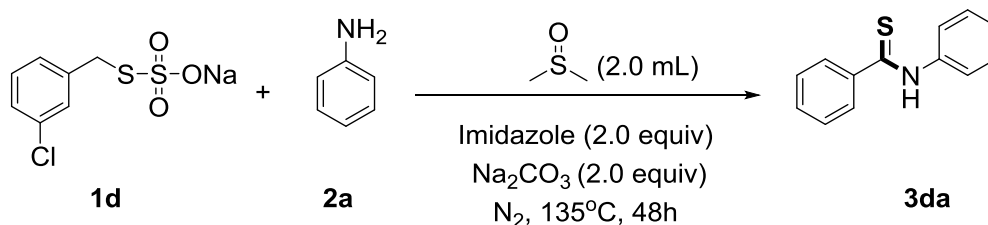

To a solution of the Bunte salts **1d** (0.75 mmol) in Dimethyl sulfoxide (2.0 mL) was added aniline **2a** (0.25 mmol), imidazole (34 mg, 0.5 mmol), and  $\text{Na}_2\text{CO}_3$  (53 mg, 0.50 mmol) under nitrogen atmosphere in five screw-cap Schlenk test tube. The reaction mixture was stirred at 135 °C, The reaction in sequence for 2.5h, 15h, 21h, 27h and 38h. After the reaction was finished, the reaction mixture was cooled to room temperature. The mixture was extracted with dichloromethane (3.0 mL  $\times$  3), the combined organic phases were dried over anhydrous  $\text{Na}_2\text{SO}_4$  and the solvent was evaporated under vacuum. The processed samples were separately passed through mass spectrometry and nuclear magnetic detection. The test results are as follows.



## 6.1 Nuclear magnetic tracking results

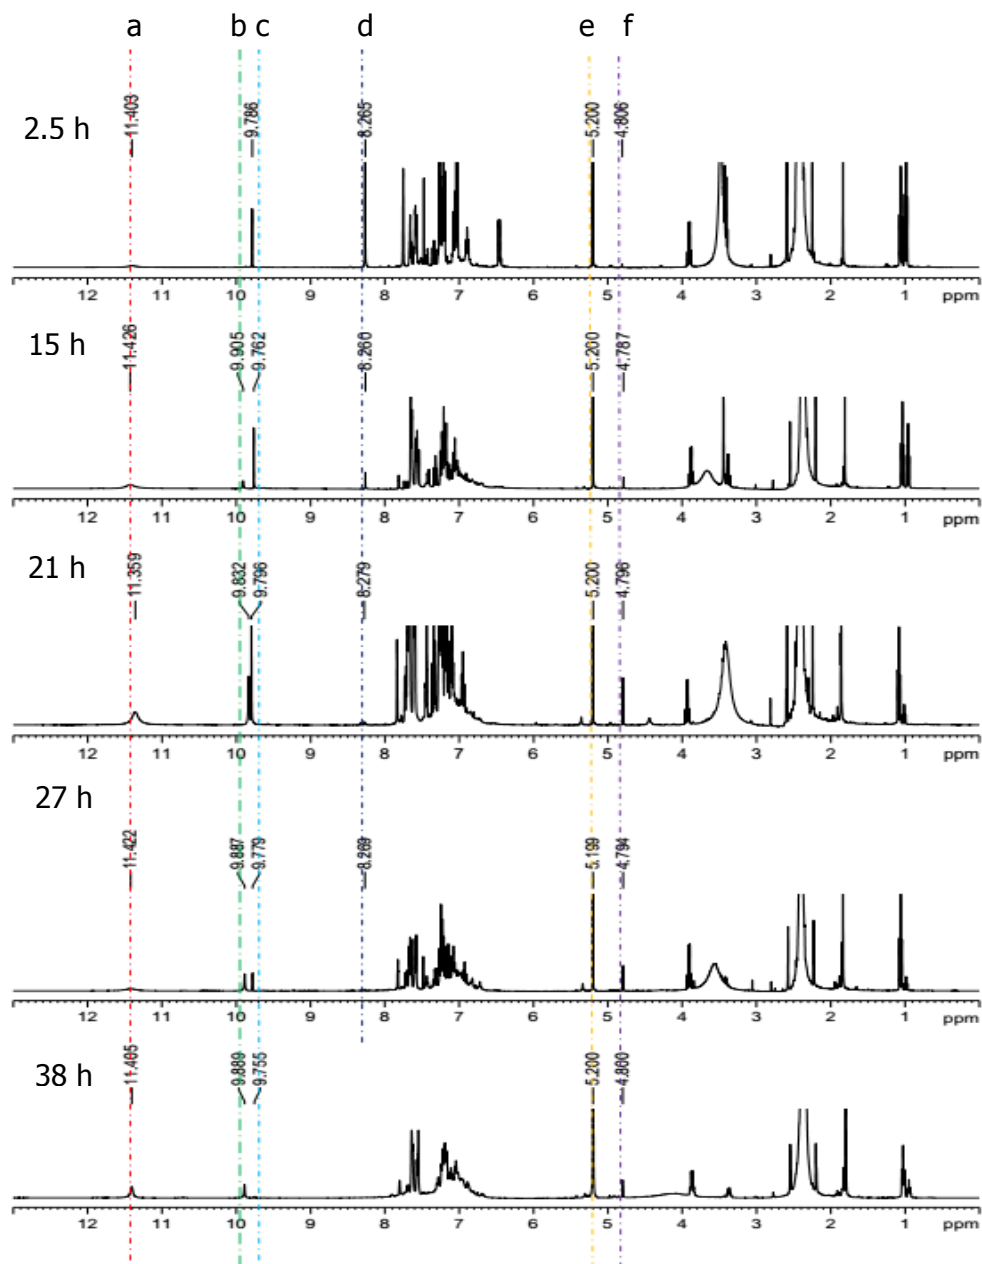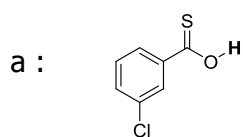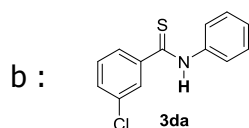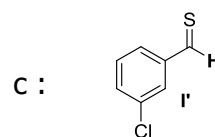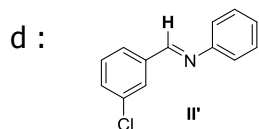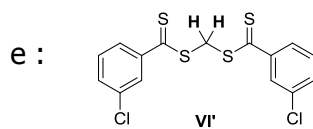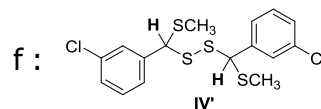

## 6.2 Mass spectrometry tracking results

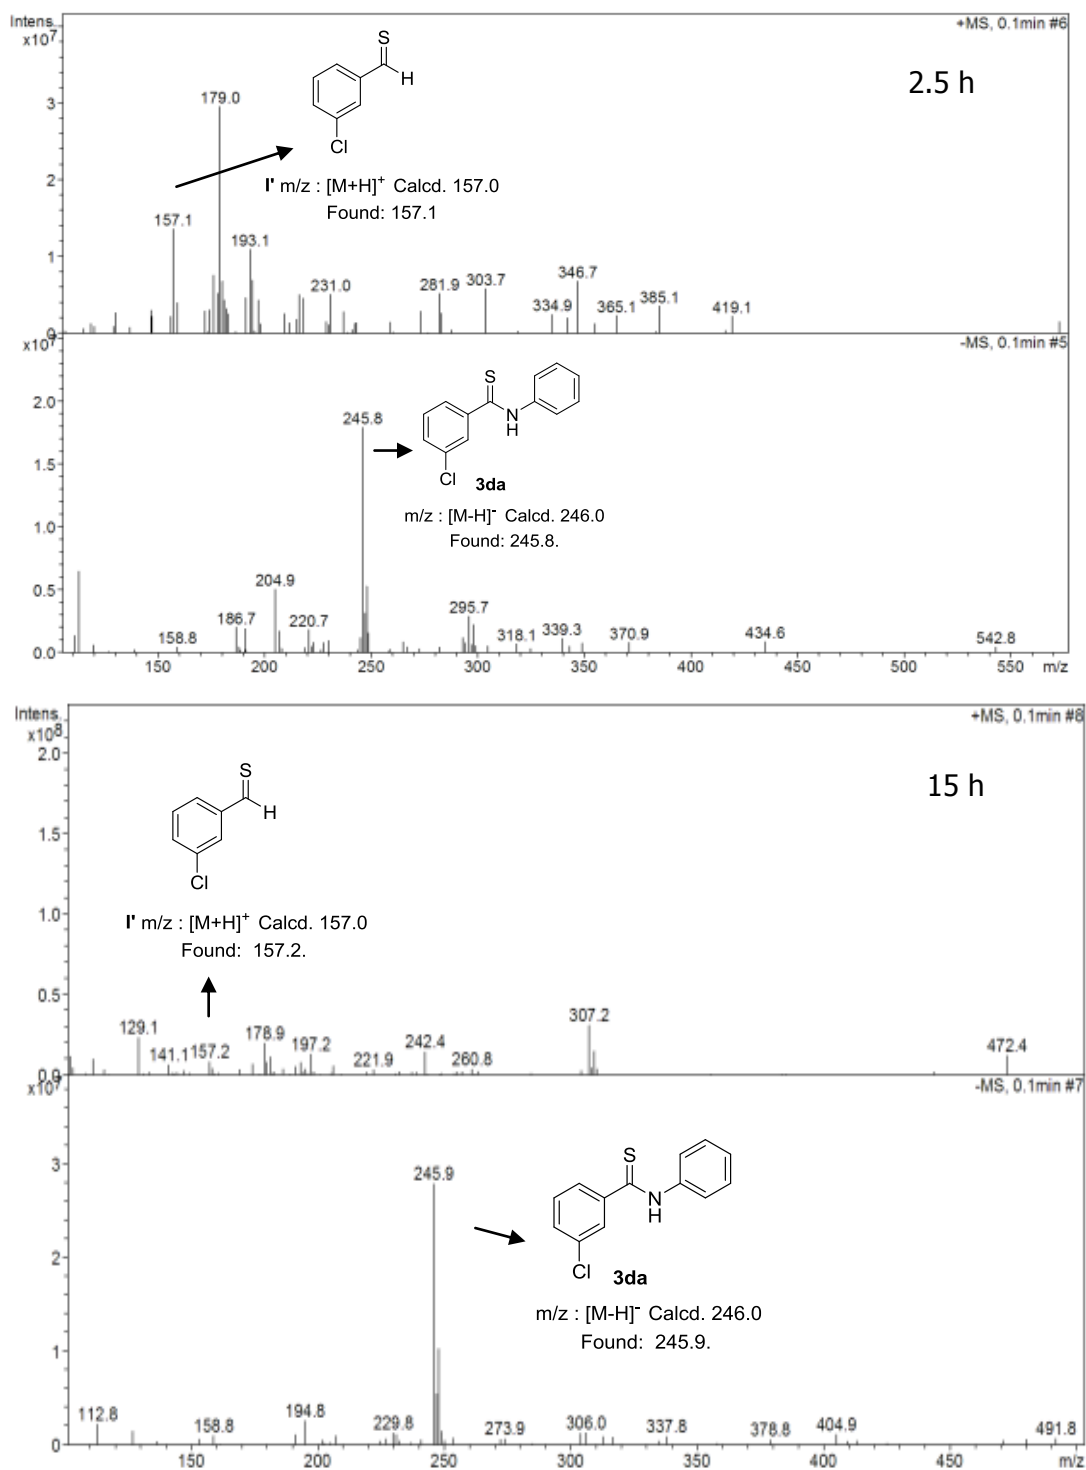

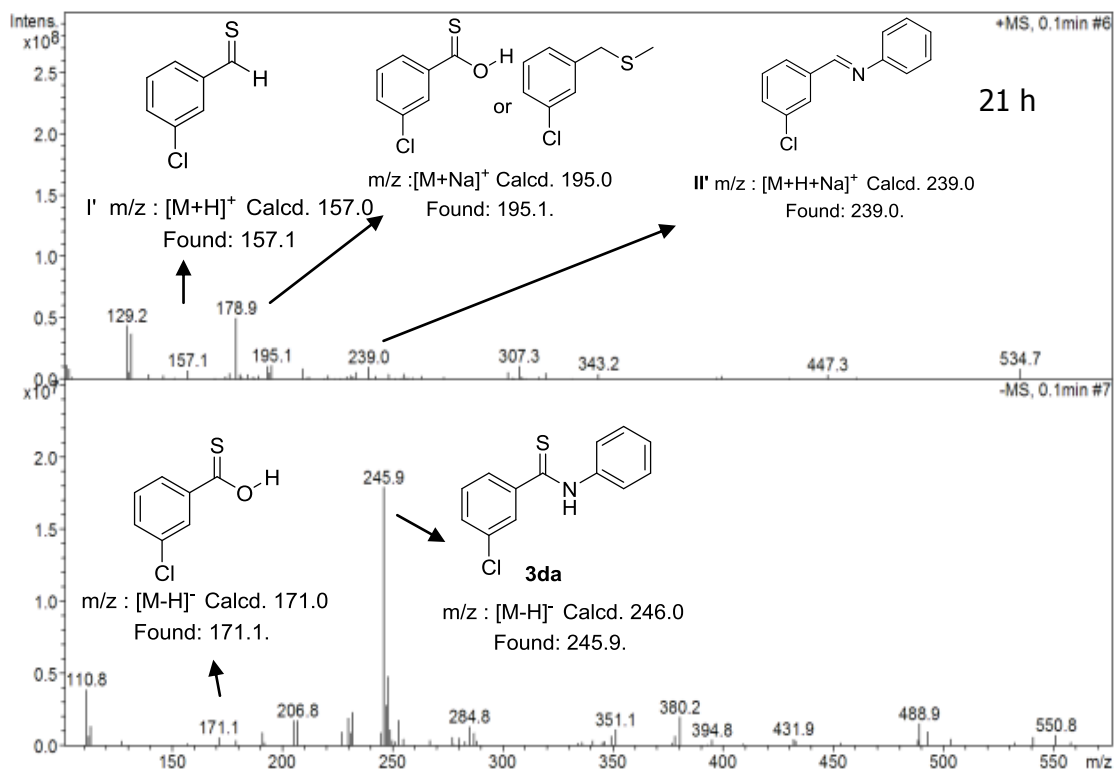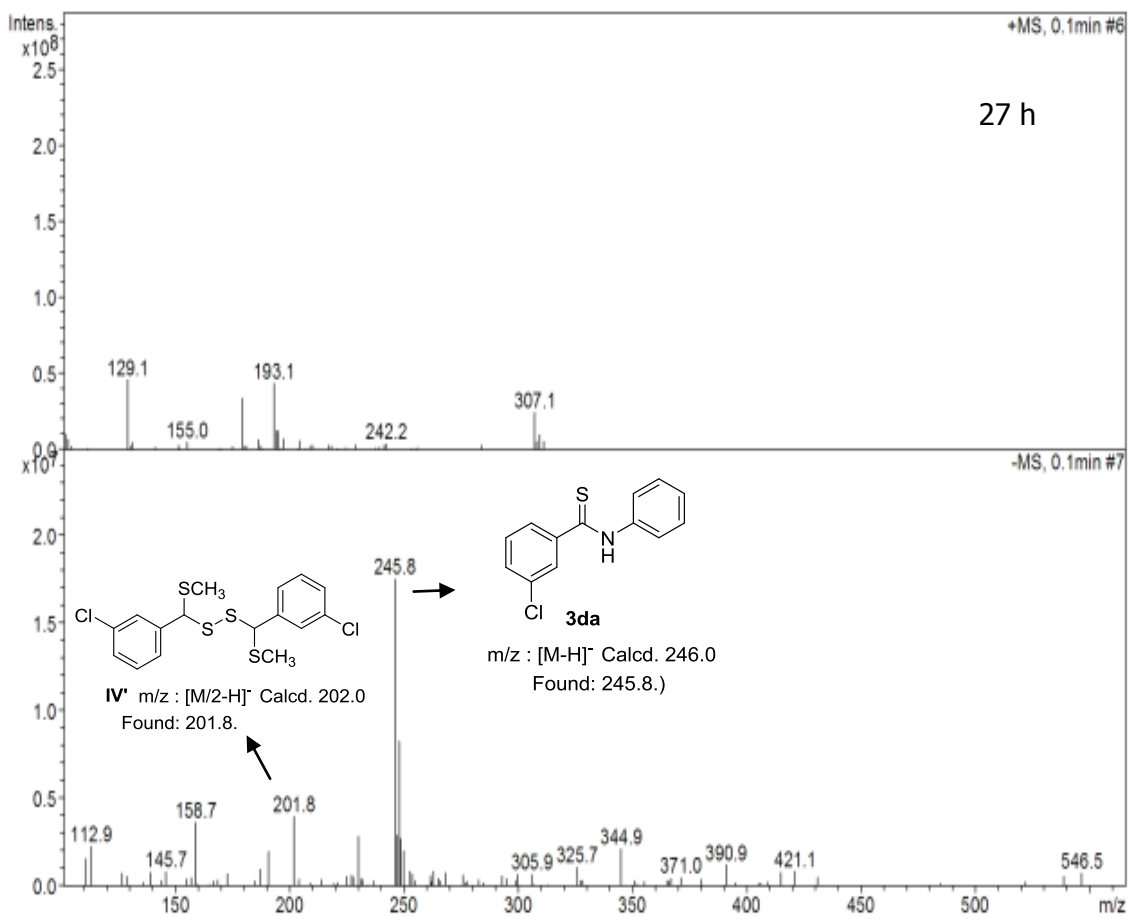

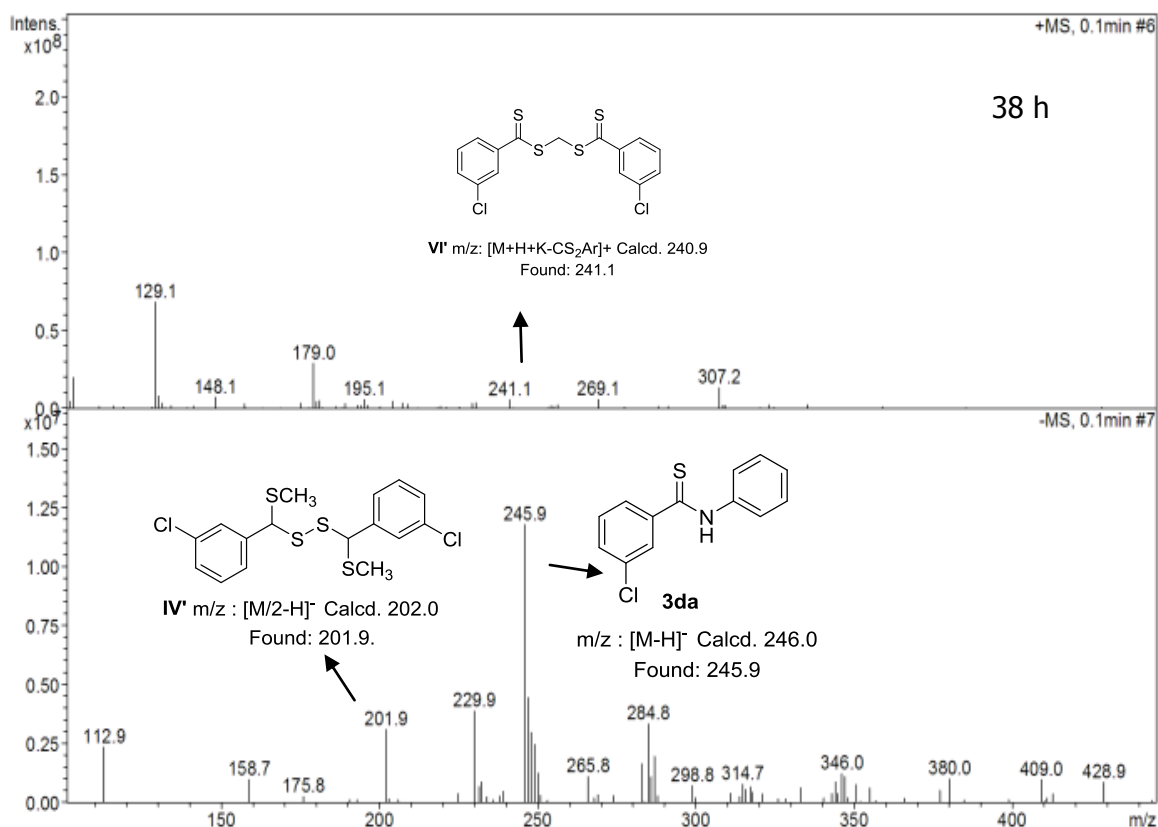

## 7. Characterization data of products

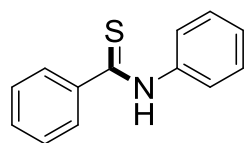

**N-phenylbenzothioamide (3aa).** Prepared according to the general procedure to afford a yellow solid in 98% yield;  $^1\text{H}$  NMR ( $\text{CDCl}_3$ , 400 MHz)  $\delta$  9.12 (s, 1H), 7.77 (d,  $J = 7.40$  Hz, 2H), 7.67 (d,  $J = 7.68$  Hz, 2H), 7.46 (q,  $J = 8.19$  Hz, 1H), 7.37 (d,  $J = 6.4$  Hz, 4H), 7.26 (d,  $J = 7.2$  Hz, 1H);  $^{13}\text{C}$  NMR ( $\text{CDCl}_3$ , 100 MHz)  $\delta$  198.41, 142.87, 138.91, 131.25, 128.94, 128.53, 126.95, 126.73, 123.81. The analytical data correspond with those reported in the literature<sup>[2]</sup>.

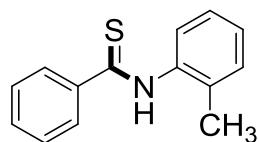

**N-(m-tolyl)benzothioamide (3ab).** Prepared according to the general procedure to afford a yellow solid in 91% yield;  $^1\text{H}$  NMR ( $\text{CDCl}_3$ , 400 MHz)  $\delta$  8.90 (s, 1H), 7.86 (d,  $J = 7.4$  Hz, 2H), 7.52-7.45 (m, 2H), 7.41 (t,  $J = 7.52$  Hz, 2H), 7.27 (t,  $J = 4.58$  Hz, 3H), 2.29 (s, 3H);  $^{13}\text{C}$  NMR ( $\text{CDCl}_3$ , 100 MHz)  $\delta$  199.62, 142.06, 137.56, 134.34, 131.49, 131.07, 128.69, 128.24, 126.89, 126.83, 126.81, 18.01. The analytical data correspond with those reported in the literature<sup>[3]</sup>.

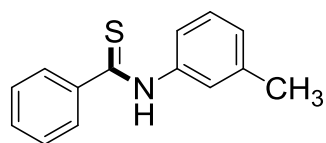

**N-(p-tolyl)benzothioamide (3ac).** Prepared according to the general procedure to afford a yellow solid in 87% yield;  $^1\text{H}$  NMR ( $\text{CDCl}_3$ , 400 MHz)  $\delta$  9.02 (s, 1H), 7.80 (d,  $J = 7.28$  Hz, 2H), 7.53 (d,  $J = 8.16$  Hz, 2H), 7.48 (t,  $J = 7.74$  Hz, 1H), 7.40 (t,  $J = 7.18$  Hz, 2H), 7.30 (t,  $J = 7.48$

Hz, 1H), 7.09 (d,  $J = 7.2$  Hz, 1H), 2.37 (s, 3H);  $^{13}\text{C}$  NMR ( $\text{CDCl}_3$ , 100 MHz)  $\delta$  198.41, 143.15, 139.10, 138.95, 131.28, 128.88, 128.65, 127.89, 126.76, 124.36, 120.97, 21.48. The analytical data correspond with those reported in the literature<sup>[4]</sup>.

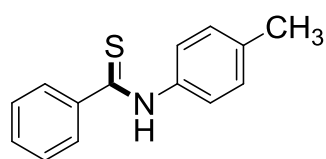

**N-(p-tolyl)benzothioamide (3ad).** Prepared according to the general procedure to afford a yellow solid in 78% yield;  $^1\text{H}$  NMR ( $\text{CDCl}_3$ , 400 MHz)  $\delta$  8.98 (s, 1H), 7.84 (d,  $J = 7.48$  Hz, 2H), 7.61 (d,  $J = 8.08$  Hz, 2H), 7.50 (t,  $J = 6.86$  Hz, 1H), 7.43 (t,  $J = 7.44$  Hz, 2H), 7.24 (t,  $J = 7.32$  Hz, 2H), 2.38 (s, 3H);  $^{13}\text{C}$  NMR ( $\text{CDCl}_3$ , 100 MHz)  $\delta$  198.37, 143.10, 137.05, 136.48, 131.23, 129.63, 128.64, 126.68, 123.84, 21.19. The analytical data correspond with those reported in the literature<sup>[2]</sup>.

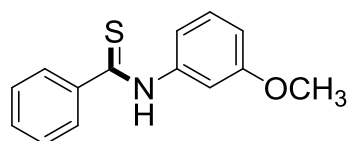

**N-(3-methoxyphenyl)benzothioamide (3ae).** Prepared according to the general procedure to afford a yellow solid in 82% yield;  $^1\text{H}$  NMR ( $\text{CDCl}_3$ , 400 MHz)  $\delta$  9.05 (s, 1H), 7.81 (d,  $J = 6.92$  Hz, 2H), 7.59 (s, 1H), 7.48 (d,  $J = 6.84$  Hz, 1H), 7.42 (d,  $J = 7.04$  Hz, 2H), 7.31 (t,  $J = 7.84$  Hz, 1H), 7.20 (d,  $J = 7.08$  Hz, 1H), 6.83 (d,  $J = 7.44$  Hz, 1H), 3.81 (s, 3H);  $^{13}\text{C}$  NMR ( $\text{CDCl}_3$ , 100 MHz)  $\delta$  198.30, 159.99, 143.30, 140.13, 131.32, 129.80, 128.68, 126.73, 115.71, 112.83, 109.09, 55.49. The analytical data correspond with those reported in the literature<sup>[3]</sup>.

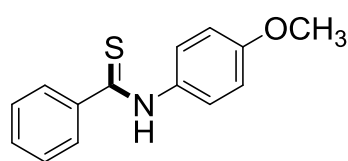

**N-(4-methoxyphenyl)benzothioamide (3af).** Prepared according to the general procedure to afford a yellow solid in 53% yield;  $^1\text{H}$  NMR ( $\text{CDCl}_3$ , 400 MHz)  $\delta$  9.02 (s, 1H), 7.81 (t,  $J = 7.88$  Hz, 2H), 7.58 (d,  $J = 8.92$  Hz, 2H), 7.46 (t,  $J = 7.34$  Hz, 1H), 7.40 (t,  $J = 7.48$  Hz, 2H), 6.93 (d,  $J = 8.92$  Hz, 2H), 3.81 (s, 3H);  $^{13}\text{C}$  NMR ( $\text{CDCl}_3$ , 100 MHz)  $\delta$  198.38, 158.23, 142.81, 132.02, 131.28, 128.64, 126.79, 125.73, 114.18, 55.54. The analytical data correspond with those reported in the literature<sup>[2]</sup>.

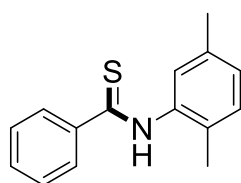

**N-(2,5-dimethylphenyl)benzothioamide (3ag).** Prepared according to the general procedure to afford a yellow solid in 70% yield;  $^1\text{H}$  NMR ( $\text{CDCl}_3$ , 400 MHz)  $\delta$  8.80 (s, 1H), 7.89 (d,  $J = 7.44$  Hz, 2H), 7.52 (t,  $J = 7.22$  Hz, 1H), 7.44 (t,  $J = 7.44$  Hz, 2H), 7.34 (s, 1H), 7.20 (d,  $J = 7.72$  Hz, 1H), 7.10 (d,  $J = 7.56$  Hz, 1H), 2.36 (s, 3H), 2.28 (s, 3H);  $^{13}\text{C}$  NMR ( $\text{CDCl}_3$ , 100 MHz)  $\delta$  198.45, 141.18, 136.24, 135.62, 130.35, 130.05, 129.82, 128.01, 127.63, 126.03, 125.75, 19.94, 16.50. The analytical data correspond with those reported in the literature<sup>[5]</sup>.

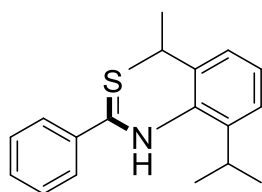

**N-(2,6-diisopropylphenyl)benzothioamide (3ah).** Prepared according to the general procedure to afford a yellow solid in 72% yield;  $^1\text{H}$  NMR ( $\text{CDCl}_3$ , 400 MHz)  $\delta$  8.63 (s, 1H), 7.93 (s, 1H), 7.91 (d,  $J = 1.4$  Hz, 1H), 7.56-7.50 (m, 1H), 7.48-7.38 (m, 3H), 7.27 (d,  $J = 7.72$  Hz, 2H), 3.07 (m, 2H), 1.28 (d,  $J = 6.84$  Hz, 6H), 1.20 (d,  $J = 6.92$  Hz, 6H);  $^{13}\text{C}$  NMR ( $\text{CDCl}_3$ , 100

MHz)  $\delta$  200.93, 145.88, 141.70, 133.91, 131.50, 129.40, 128.80, 126.75, 124.03, 28.94, 23.96 (d,  $J = 26.10$  Hz). The analytical data correspond with those reported in the literature<sup>[6]</sup>.

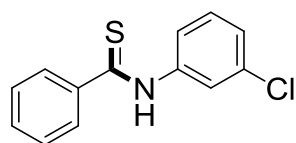

**N-(3-chlorophenyl)benzothioamide (3ai).** Prepared according to the general procedure to afford a yellow solid in 83% yield;  $^1\text{H NMR}$  ( $\text{CDCl}_3$ , 400 MHz)  $\delta$  9.03 (s, 1H), 7.86 (s, 1H), 7.79 (s, 2H), 7.60 (s, 1H), 7.50 (t,  $J = 6.90$  Hz, 1H), 7.41 (t,  $J = 7.34$  Hz, 2H), 7.34 (t,  $J = 7.78$  Hz, 1H), 7.24 (s, 1H);  $^{13}\text{C NMR}$  ( $\text{CDCl}_3$ , 100 MHz)  $\delta$  198.81, 142.85, 139.98, 134.56, 131.48, 129.00, 128.68, 126.96, 126.70, 123.70, 121.81. The analytical data correspond with those reported in the literature<sup>[2]</sup>.

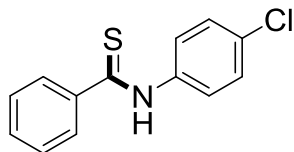

**N-(4-chlorophenyl)benzothioamide (3aj).** Prepared according to the general procedure to afford a yellow solid in 92% yield;  $^1\text{H NMR}$  ( $\text{CDCl}_3$ , 400 MHz)  $\delta$  8.94 (s, 1H), 7.74 (d,  $J = 6.99$  Hz, 2H), 7.62 (d,  $J = 7.68$  Hz, 2H), 7.42 (d,  $J = 6.96$  Hz, 1H), 7.33 (q,  $J = 8.77$  Hz, 4H);  $^{13}\text{C NMR}$  ( $\text{CDCl}_3$ , 100 MHz)  $\delta$  197.65, 141.80, 136.42, 131.08, 130.45, 128.13, 127.65, 125.66, 124.04. The analytical data correspond with those reported in the literature<sup>[2]</sup>.

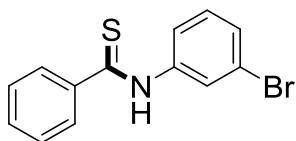

**N-(3-bromophenyl)benzothioamide (3ak).** Prepared according to the general procedure to afford a yellow solid in 52% yield;  $^1\text{H NMR}$  ( $\text{CDCl}_3$ , 400 MHz)  $\delta$  9.00 (s, 1H), 7.99 (s, 1H), 7.80 (s, 2H), 7.68 (d,  $J = 4.00$  Hz, 1H), 7.50 (t, 6.86 Hz, 1H), 7.42 (t,  $J = 7.34$  Hz, 3H), 7.29 (d,  $J = 7.12$  Hz, 1H);  $^{13}\text{C NMR}$  ( $\text{CDCl}_3$ , 100 MHz)  $\delta$  198.79, 142.84, 140.06, 131.50, 130.27, 129.88, 128.69, 126.68, 126.52, 122.39, 122.30. The analytical data correspond with those reported in the literature<sup>[3]</sup>.

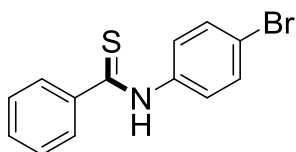

**N-(4-bromophenyl)benzothioamide (3al).** Prepared according to the general procedure to afford a yellow solid in 69% yield;  $^1\text{H NMR}$  ( $\text{CDCl}_3$ , 400 MHz)  $\delta$  8.99 (s, 1H), 7.81 (d,  $J = 6.28$  Hz, 2H), 7.66 (d,  $J = 7.28$  Hz, 2H), 7.56-7.47 (m, 3H), 7.43 (d,  $J = 6.96$  Hz, 2H);  $^{13}\text{C NMR}$  ( $\text{CDCl}_3$ , 100 MHz)  $\delta$  198.60, 142.89, 137.96, 132.12, 131.47, 128.69, 126.67, 125.25, 119.93. The analytical data correspond with those reported in the literature<sup>[3]</sup>.

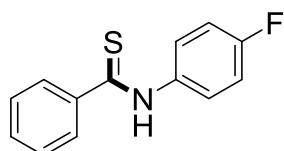

**N-(4-fluorophenyl)benzothioamide (3am).** Prepared according to the general procedure to afford a yellow solid in 98% yield;  $^1\text{H NMR}$  ( $\text{CDCl}_3$ , 400 MHz)  $\delta$  9.06 (s, 1H), 7.79 (d,  $J = 7.44$  Hz, 2H), 7.63 (q,  $J = 4.51$  Hz, 2H), 7.49 (t,  $J = 7.34$  Hz, 1H), 7.40 (t, 7.56 Hz, 2H), 7.08 (t, 8.54 Hz, 2H);  $^{13}\text{C NMR}$  ( $\text{CDCl}_3$ , 100 MHz)  $\delta$  198.88, 160.88 (d,  $J_{\text{C-F}} = 246.01$  Hz), 142.60, 134.94 (d,  $J_{\text{C-F}} = 2.75$  Hz), 131.51, 128.69, 126.79, 126.18 (d,  $J_{\text{C-F}} = 8.29$  Hz), 115.92 (d,  $J_{\text{C-F}} = 22.64$  Hz);  $^{19}\text{F NMR}$  (377 MHz,  $\text{CDCl}_3$ )  $\delta$  -113.59. The analytical data correspond with those reported in the literature<sup>[2]</sup>.

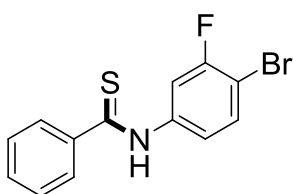

**N-(4-bromo-3-fluorophenyl)benzothioamide (3an).**

Prepared according to the general procedure to afford a yellow solid in 62% yield; mp 140 °C;  $^1\text{H NMR}$  ( $\text{CDCl}_3$ , 400 MHz)  $\delta$  9.02 (s, 1H), 7.94 (s, 1H), 7.79 (d,  $J = 5.52$  Hz, 2H), 7.59-7.49 (m, 2H), 7.43 (t,  $J = 7.52$  Hz, 2H), 7.33 (m, 1H);  $^{13}\text{C NMR}$  ( $\text{CDCl}_3$ , 100 MHz)  $\delta$  198.91, 158.85 (d,  $J_{\text{C-F}} = 246.11$  Hz), 139.48 (d,  $J_{\text{C-F}} = 9.30$  Hz), 133.50, 131.62, 128.77, 126.67, 120.00 (d,  $J_{\text{C-F}} = 3.57$  Hz), 111.79, 111.52, 106.30 (d,  $J_{\text{C-F}} = 20.60$  Hz);  $^{19}\text{F NMR}$  (377 MHz,  $\text{CDCl}_3$ )  $\delta$  -114.27; **HR-MS** ( $\text{ESI}^+$ ): calcd. for  $\text{C}_{13}\text{H}_9\text{BrFNS}$   $[\text{M}+\text{H}]^+$ : 309.9696, Found: 309.9697.

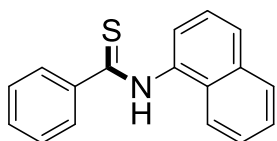

**N-(3-bromophenyl)benzothioamide (3ao).**

Prepared according to the general procedure to afford a yellow solid in 35% yield;  $^1\text{H NMR}$  ( $\text{CDCl}_3$ , 400 MHz)  $\delta$  9.20 (s, 1H), 7.99 (d,  $J = 7.56$  Hz, 2H), 7.94-7.84 (m, 3H), 7.75 (d,  $J = 7.12$  Hz, 1H), 7.57-7.43 (m, 6H);  $^{13}\text{C NMR}$  ( $\text{CDCl}_3$ , 100 MHz)  $\delta$  200.58, 142.04, 134.90, 134.28, 131.57, 128.78, 128.72, 128.56, 126.94, 126.88, 126.50, 125.45, 124.76, 121.86. The analytical data correspond with those reported in the literature<sup>[7]</sup>.

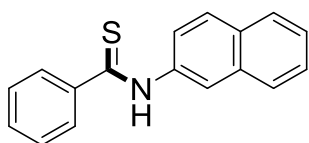

**N-(naphthalen-2-yl)benzothioamide (3ap).**

Prepared according to the general procedure to afford a yellow solid in 47% yield;  $^1\text{H NMR}$  ( $\text{CDCl}_3$ , 400 MHz)  $\delta$  9.18 (s, 1H), 8.39 (s, 1H), 7.87 (d,  $J = 7.80$  Hz, 2H), 7.83 (t,  $J = 3.66$  Hz, 2H), 7.71 (d,  $J = 8.12$  Hz, 1H), 7.50 (q,  $J = 3.03$  Hz, 3H), 7.45 (d,  $J = 7.36$  Hz, 2H);  $^{13}\text{C NMR}$  ( $\text{CDCl}_3$ , 100 MHz)  $\delta$  198.42, 143.12, 136.45, 133.34, 131.99, 131.35, 128.81, 128.69, 127.99, 127.73, 126.70, 126.28, 122.66, 121.24. The analytical data correspond with those reported in the literature<sup>[8]</sup>.

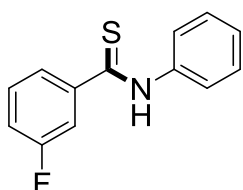

**3-fluoro-N-phenylbenzothioamide (3ba).**

Prepared according to the general procedure to afford a yellow solid in 92% yield;  $^1\text{H NMR}$  ( $\text{CDCl}_3$ , 400 MHz)  $\delta$  9.02 (s, 1H), 7.74 (d,  $J = 7.76$  Hz, 2H), 7.58 (d,  $J = 7.92$  Hz, 2H), 7.48-7.38 (m, 3H), 7.31 (t,  $J = 7.26$  Hz, 1H), 7.20 (t,  $J = 7.94$  Hz, 1H);  $^{13}\text{C NMR}$  ( $\text{CDCl}_3$ , 100 MHz)  $\delta$  195.57, 161.50 (d,  $J_{\text{C-F}} = 246.84$  Hz), 144.11, 137.74, 129.24 (d,  $J_{\text{C-F}} = 7.87$  Hz), 128.10, 126.18, 122.67, 120.80, 117.10 (d,  $J_{\text{C-F}} = 21.18$  Hz), 113.50 (d,  $J_{\text{C-F}} = 23.31$  Hz);  $^{19}\text{F NMR}$  (377 MHz,  $\text{CDCl}_3$ )  $\delta$  -111.50. The analytical data correspond with those reported in the literature<sup>[10]</sup>.

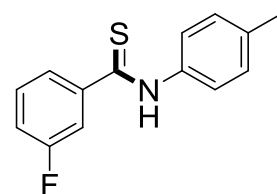

**3-fluoro-N-(p-tolyl)benzothioamide (3bd).**

Prepared according to the general procedure to afford a yellow solid in 83% yield;  $^1\text{H NMR}$  ( $\text{CDCl}_3$ , 400 MHz)  $\delta$  8.97 (s, 1H), 7.59 (t,  $J = 7.56$  Hz, 4H), 7.39 (q,  $J = 7.16$  Hz, 1H), 7.24 (d,  $J = 7.00$  Hz, 2H), 7.18 (dq,  $J = 9.48$  Hz, 2.24 Hz, 1H), 2.38 (s, 3H);  $^{13}\text{C NMR}$  ( $\text{CDCl}_3$ , 100 MHz)  $\delta$  195.45, 161.50 (d,  $J_{\text{C-F}} = 246.81$  Hz), 144.01 (d,  $J_{\text{C-F}} = 6.72$  Hz), 136.25, 135.22, 129.21 (d,  $J_{\text{C-F}} = 8.18$  Hz),

128.66, 122.76, 120.79 (d,  $J_{C-F} = 2.57$  Hz), 117.04 (d,  $J_{C-F} = 21.28$  Hz), 113.49 (d,  $J_{C-F} = 23.52$  Hz), 20.17;  $^{19}\text{F}$  NMR (377 MHz,  $\text{CDCl}_3$ )  $\delta$  -111.59. The analytical data correspond with those reported in the literature<sup>[10]</sup>.

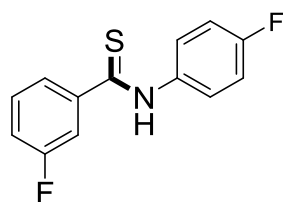

**3-fluoro-N-(4-fluorophenyl)benzothioamide (3bm).**

Prepared according to the general procedure to afford a yellow solid in 64% yield, mp 110 °C;  $^1\text{H}$  NMR ( $\text{CDCl}_3$ , 400 MHz)  $\delta$  8.98 (s, 1H), 7.67 (q,  $J = 4.49$  Hz, 2H), 7.57 (d,  $J = 7.64$  Hz, 2H), 7.40 (q,  $J = 7.17$  Hz, 1H), 7.20 (q,  $J = 7.36$  Hz, 1H), 7.13 (t,  $J = 8.5$  Hz, 2H);  $^{13}\text{C}$  NMR ( $\text{CDCl}_3$ , 100 MHz)  $\delta$  197.08, 162.51 (d,  $J_{C-F} = 246.55$  Hz), 160.94 (d,  $J_{C-F} = 246.33$  Hz), 144.62 (d,  $J_{C-F} = 7.06$  Hz), 134.67, 130.31 (d,  $J_{C-F} = 8.09$  Hz), 126.03 (d,  $J_{C-F} = 8.31$  Hz), 121.81 (d,  $J_{C-F} = 2.52$  Hz), 118.30 (d,  $J_{C-F} = 21.27$  Hz), 116.04 (d,  $J_{C-F} = 22.74$  Hz), 114.52 (d,  $J_{C-F} = 23.55$  Hz);  $^{19}\text{F}$  NMR (377 MHz,  $\text{CDCl}_3$ )  $\delta$  -111.42, -113.27; **HR-MS** (ESI<sup>+</sup>): calcd. for  $\text{C}_{13}\text{H}_9\text{F}_2\text{NS}$   $[\text{M}+\text{H}]^+$ : 250.0497, Found: 250.0496.

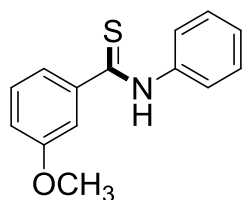

**N-(3-bromophenyl)benzothioamide (3ca).** Prepared according to the general procedure to afford a yellow solid in 65% yield;  $^1\text{H}$  NMR ( $\text{CDCl}_3$ , 400 MHz)  $\delta$  9.02 (s, 1H), 7.77 (d,  $J = 7.84$  Hz, 2H), 7.45 (t,  $J = 7.04$  Hz, 3H), 7.33 (m, 3H), 7.04 (d,  $J = 7.36$  Hz, 1H), 3.87 (s, 3H);  $^{13}\text{C}$  NMR ( $\text{CDCl}_3$ , 100 MHz)  $\delta$  198.12, 159.66, 144.62, 138.90, 129.68, 129.08, 127.03, 123.66, 118.07,

117.40, 112.61, 55.51. The analytical data correspond with those reported in the literature<sup>[3]</sup>.

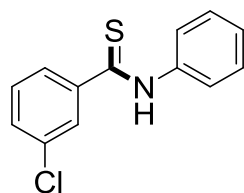

**3-chloro-N-phenylbenzothioamide (3da).** Prepared according to the general procedure to afford a yellow solid in 81% yield;  $^1\text{H}$  NMR ( $\text{CDCl}_3$ , 400 MHz)  $\delta$  8.90 (s, 1H), 7.83 (s, 1H), 7.75 (d,  $J = 7.20$  Hz, 2H), 7.70 (d,  $J = 7.36$  Hz, 1H), 7.44 (d,  $J = 7.88$  Hz, 3H), 7.37 (t,  $J = 7.92$  Hz, 1H), 7.31 (t,  $J = 7.06$  Hz, 1H);  $^{13}\text{C}$  NMR ( $\text{CDCl}_3$ , 100 MHz)  $\delta$  195.52, 143.70, 137.71, 133.70,

130.10, 128.89, 128.12, 126.20, 125.96, 123.71, 122.64. The analytical data correspond with those reported in the literature<sup>[5]</sup>.

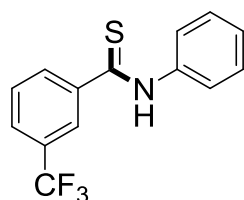

**N-phenyl-3-(trifluoromethyl)benzothioamide (3ea).** Prepared according to the general procedure to afford a yellow solid in 77% yield, mp 130 °C;  $^1\text{H}$  NMR ( $\text{CDCl}_3$ , 400 MHz)  $\delta$  9.03 (s, 1H), 8.08 (s, 1H), 8.02 (d,  $J = 7.48$  Hz, 1H), 7.75 (d,  $J = 7.48$  Hz, 3H), 7.57 (t,  $J = 7.56$  Hz, 1H), 7.46 (t,  $J = 7.42$  Hz, 2H), 7.33 (t,  $J = 7.06$  Hz, 1H);  $^{13}\text{C}$  NMR ( $\text{CDCl}_3$ , 100 MHz)  $\delta$  196.61, 143.72,

138.64, 131.09 (q,  $J = 32.72$  Hz), 130.02, 129.31, 129.18, 127.67, 127.36, 123.75, 123.60 (q,  $J = 271.32$  Hz), 123.52 (q,  $J = 3.83$  Hz);  $^{19}\text{F}$  NMR (377 MHz,  $\text{CDCl}_3$ )  $\delta$  -62.65; **HR-MS** (ESI<sup>+</sup>): calcd. for  $\text{C}_{14}\text{H}_{10}\text{F}_3\text{NS}$   $[\text{M}+\text{H}]^+$ : 282.0559, Found: 282.0558.



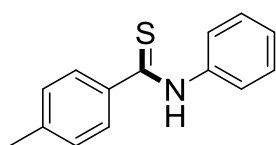

**4-methyl-N-phenylbenzothioamide (3fa).** Prepared according to the general procedure to afford a yellow solid in 44% yield;  $^1\text{H NMR}$  ( $\text{CDCl}_3$ , 400 MHz)  $\delta$  8.98 (s, 1H), 7.77 (s, 4H), 7.44 (s, 2H), 7.29 (s, 1H), 7.23 (s, 2H), 2.40 (s, 3H);  $^{13}\text{C NMR}$  ( $\text{CDCl}_3$ , 100 MHz)  $\delta$  198.28, 141.95, 140.41, 139.11, 129.27, 129.06, 126.91, 126.70, 123.77, 21.40. The analytical data correspond with those reported in the literature<sup>[9]</sup>.

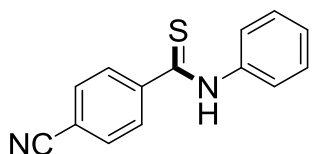

**4-cyano-N-phenylbenzothioamide (3ga).** Prepared according to the general procedure to afford a yellow solid in 87% yield;  $^1\text{H NMR}$  ( $\text{CDCl}_3$ , 400 MHz)  $\delta$  9.11 (s, 1H), 7.90 (d,  $J = 8.12$  Hz, 2H), 7.76 (d,  $J = 7.84$  Hz, 2H), 7.70 (d,  $J = 8.16$  Hz, 2H), 7.47 (t,  $J = 7.70$  Hz, 2H), 7.34 (t,  $J = 6.86$  Hz, 1H);  $^{13}\text{C NMR}$  ( $\text{CDCl}_3$ , 100 MHz)  $\delta$  195.89, 146.62, 138.52, 132.46, 129.20, 127.46, 127.37, 123.53, 118.10, 114.31. The analytical data correspond with those reported in the literature<sup>[3]</sup>.

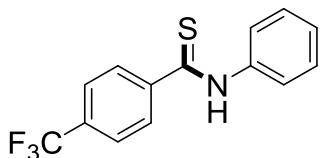

**N-phenyl-4-(trifluoromethyl)benzothioamide (3ha).** Prepared according to the general procedure to afford a yellow solid in 99% yield, mp 190 °C;  $^1\text{H NMR}$  ( $\text{CDCl}_3$ , 400 MHz)  $\delta$  8.95 (s, 1H), 7.86 (d,  $J = 7.44$  Hz, 2H), 7.70 (d,  $J = 7.32$  Hz, 2H), 7.63 (d,  $J = 7.48$  Hz, 2H), 7.40 (t,  $J = 6.98$  Hz, 2H), 7.26 (t,  $J = 6.98$  Hz, 1H);  $^{13}\text{C NMR}$  ( $\text{CDCl}_3$ , 100 MHz)  $\delta$  195.70, 145.20, 137.62, 131.73 (q,  $J = 34.76$  Hz), 128.17, 126.33, 126.03, 124.70 (q,  $J = 3.83$  Hz), 122.62 (q,  $J = 270.60$  Hz), 122.57;  $^{19}\text{F NMR}$  (377 MHz,  $\text{CDCl}_3$ )  $\delta$  -62.89; **HR-MS** ( $\text{ESI}^+$ ): calcd. for  $\text{C}_{14}\text{H}_{10}\text{F}_3\text{NS}$  [ $\text{M}+\text{H}$ ] $^+$ : 282.0559, Found: 282.0557.

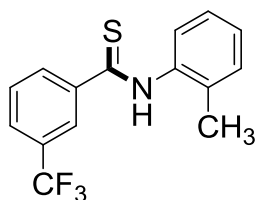

**N-(m-tolyl)-3-(trifluoromethyl)benzothioamide (3eb).** Prepared according to the general procedure to afford a yellow solid in 99% yield, mp 82°C;  $^1\text{H NMR}$  ( $\text{CDCl}_3$ , 400 MHz)  $\delta$  8.88 (s, 1H), 8.12 (s, 1H), 8.05 (d,  $J = 7.68$  Hz, 1H), 7.76 (d,  $J = 7.64$  Hz, 1H), 7.57 (t,  $J = 7.76$  Hz, 3H), 7.49 (t,  $J = 4.12$  Hz, 1H), 7.30 (d,  $J = 9.24$  Hz, 3H), 2.32 (s, 3H);  $^{13}\text{C NMR}$  ( $\text{CDCl}_3$ , 100 MHz)  $\delta$  196.76, 141.60, 136.13, 133.25, 130.11, 130.05 (q,  $J = 32.64$  Hz), 128.96, 128.26, 127.45, 126.80 (q,  $J = 6.90$  Hz), 125.88, 125.62, 122.71 (q,  $J = 3.80$  Hz), 122.58 (q,  $J = 270.80$  Hz), 16.91;  $^{19}\text{F NMR}$  (377 MHz,  $\text{CDCl}_3$ )  $\delta$  -62.61; **HR-MS** ( $\text{ESI}^+$ ): calcd. for  $\text{C}_{15}\text{H}_{12}\text{F}_3\text{NS}$  [ $\text{M}+\text{H}$ ] $^+$ : 296.0715, Found: 296.0716.

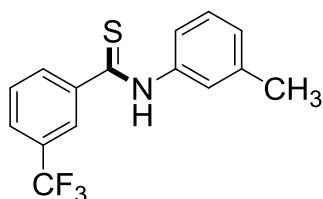

**N-(m-tolyl)-3-(trifluoromethyl)benzothioamide (3ec).** Prepared according to the general procedure to afford a yellow solid in 99% yield, mp 126°C;  $^1\text{H NMR}$  ( $\text{CDCl}_3$ , 400 MHz)  $\delta$  9.03 (s, 1H), 8.05 (s, 1H), 7.98 (d,  $J = 7.64$  Hz, 1H), 7.73 (d,  $J = 7.59$  Hz, 1H), 7.54 (t,  $J = 7.44$  Hz,

3H), 7.32 (t,  $J = 7.58$  Hz, 1H), 7.12 (d,  $J = 7.44$  Hz, 1H), 2.39 (s, 3H);  $^{13}\text{C}$  NMR ( $\text{CDCl}_3$ , 100 MHz)  $\delta$  196.50, 143.70, 139.23, 138.58, 131.03 (q,  $J_{\text{C-F}} = 32.49$  Hz), 130.00, 129.26, 128.96, 128.18, 124.29, 123.60 (q,  $J_{\text{C-F}} = 270.90$  Hz), 123.57, 123.54, 120.90, 21.41;  $^{19}\text{F}$  NMR (377 MHz,  $\text{CDCl}_3$ )  $\delta$  -62.61; **HR-MS** ( $\text{ESI}^+$ ): calcd. for  $\text{C}_{15}\text{H}_{12}\text{F}_3\text{NS}$   $[\text{M}+\text{H}]^+$ : 196.0715, Found: 296.0720.

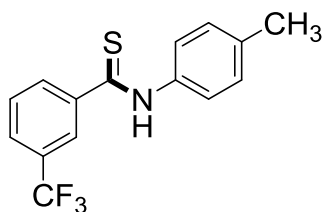

**N-(p-tolyl)-3-(trifluoromethyl)benzothioamide (3ed).**

Prepared according to the general procedure to afford a yellow solid in 72% yield, mp 128°C;  $^1\text{H}$  NMR ( $\text{CDCl}_3$ , 400 MHz)  $\delta$  9.03 (s, 1H), 8.06 (s, 1H), 8.00 (d,  $J = 7.80$  Hz, 1H), 7.73 (d,  $J = 7.72$  Hz, 1H), 7.56 (q,  $J = 8.60$  Hz, 4H), 7.23 (s, 1H), 2.38 (s, 3H);  $^{13}\text{C}$  NMR ( $\text{CDCl}_3$ , 100 MHz)  $\delta$  196.49, 143.59, 137.43, 136.13, 131.02 (q,  $J_{\text{C-F}} = 32.78$  Hz), 130.02, 129.72, 129.24, 127.53 (q,  $J_{\text{C-F}} = 3.38$  Hz), 123.85, 123.67 (q,  $J_{\text{C-F}} = 275.68$  Hz), 123.57 (q,  $J_{\text{C-F}} = 3.76$  Hz), 21.21;  $^{19}\text{F}$  NMR (377 MHz,  $\text{CDCl}_3$ )  $\delta$  -62.62; **HR-MS** ( $\text{ESI}^+$ ): calcd. for  $\text{C}_{15}\text{H}_{12}\text{F}_3\text{NS}$   $[\text{M}+\text{H}]^+$ : 296.0715, Found: 296.0715.

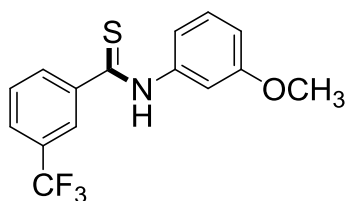

**N-(3-methoxyphenyl)-3-(trifluoromethyl)benzothioamide (3ee).**

Prepared according to the general procedure to afford a yellow solid in 57% yield, mp 102-103°C;  $^1\text{H}$  NMR ( $\text{CDCl}_3$ , 400 MHz)  $\delta$  9.05 (s, 1H), 8.05 (s, 1H), 7.99 (d,  $J = 6.44$  Hz, 1H), 7.74 (d,  $J = 7.36$  Hz, 1H), 7.56 (s, 2H), 7.34 (t,  $J = 8.34$  Hz, 1H), 7.20 (t,  $J = 6.90$  Hz, 1H), 6.85 (d,  $J = 7.6$  Hz, 1H), 3.83 (s, 3H);  $^{13}\text{C}$  NMR ( $\text{CDCl}_3$ , 100 MHz)  $\delta$  196.39, 160.05, 143.85, 139.77, 131.06 (q,  $J_{\text{C-F}} = 33.76$  Hz), 129.98, 129.89, 129.29, 127.65, 123.64 (q,  $J_{\text{C-F}} = 276.00$  Hz), 123.54, 115.67, 113.06, 109.13, 55.47;  $^{19}\text{F}$  NMR (377 MHz,  $\text{CDCl}_3$ )  $\delta$  -62.61; **HR-MS** ( $\text{ESI}^+$ ): calcd. for  $\text{C}_{15}\text{H}_{12}\text{F}_3\text{NOS}$   $[\text{M}+\text{H}]^+$ : 312.0664, Found: 312.0663.

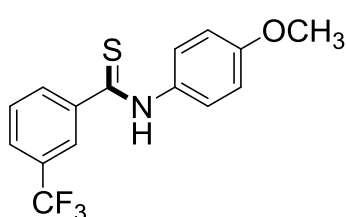

**N-(4-methoxyphenyl)-3-(trifluoromethyl)benzothioamide (3ef).**

Prepared according to the general procedure to afford a yellow solid in 83% yield, mp 121°C;  $^1\text{H}$  NMR ( $\text{CDCl}_3$ , 400 MHz)  $\delta$  9.04 (s, 1H), 8.05 (s, 1H), 7.99 (d,  $J = 7.84$  Hz, 1H), 7.73 (d, 7.76 Hz, 1H), 7.61-7.52 (m, 3H), 6.96-6.93 (m, 2H), 3.83 (s, 3H);  $^{13}\text{C}$  NMR ( $\text{CDCl}_3$ , 100 MHz)  $\delta$  196.48, 158.42, 143.40, 131.64, 130.99 (q,  $J_{\text{C-F}} = 32.60$  Hz), 130.05, 129.23, 127.60 (q,  $J_{\text{C-F}} = 36.53$  Hz), 125.63, 123.64 (q,  $J_{\text{C-F}} = 270.96$  Hz), 123.58 (q,  $J_{\text{C-F}} = 3.87$  Hz), 114.24, 55.50;  $^{19}\text{F}$  NMR (377 MHz,  $\text{CDCl}_3$ )  $\delta$  -62.60; **HR-MS** ( $\text{ESI}^+$ ): calcd. for  $\text{C}_{15}\text{H}_{12}\text{F}_3\text{NOS}$   $[\text{M}+\text{H}]^+$ : 312.0664, Found: 312.0661.

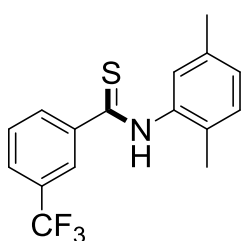

**N-(2,5-dimethylphenyl)-3-(trifluoromethyl)benzothioamide (3eg).** Prepared according to the general procedure to afford a

yellow solid in 94% yield, mp 101 °C;  $^1\text{H NMR}$  ( $\text{CDCl}_3$ , 400 MHz)  $\delta$  8.80 (s, 1H), 8.04 (s, 1H), 7.95 (d,  $J = 7.68$  Hz, 1H), 7.67 (d,  $J = 7.64$  Hz, 1H), 7.48 (t,  $J = 7.76$  Hz, 1H), 7.20 (s, 1H), 7.11 (d,  $J = 7.72$  Hz, 1H), 7.02 (d,  $J = 7.56$  Hz, 1H), 2.27 (s, 3H), 2.19 (s, 3H);  $^{13}\text{C NMR}$  ( $\text{CDCl}_3$ , 100 MHz)  $\delta$  196.66, 141.68, 135.94, 135.72, 130.99 (q,  $J_{\text{C-F}} = 25.76$  Hz), 130.20, 130.10, 129.90, 128.94, 128.24 (d,  $J_{\text{C-F}} = 4.93$  Hz), 126.71 (q,  $J_{\text{C-F}} = 3.63$  Hz), 125.96, 122.72 (q,  $J_{\text{C-F}} = 4.04$  Hz), 122.58 (q,  $J_{\text{C-F}} = 267.37$  Hz), 19.91, 16.47;  $^{19}\text{F NMR}$  (377 MHz,  $\text{CDCl}_3$ )  $\delta$  -62.62; **HR-MS** ( $\text{ESI}^+$ ): calcd. for  $\text{C}_{16}\text{H}_{14}\text{F}_3\text{NS}$   $[\text{M}+\text{H}]^+$ : 310.0872, Found: 310.0878.

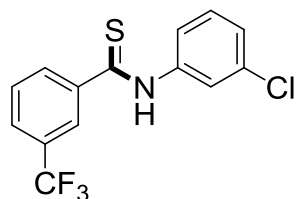

**N-(3-chlorophenyl)-3-(trifluoromethyl)benzothioamide (3ei).** Prepared according to the general procedure to afford a yellow solid in 86% yield, mp 125 °C;  $^1\text{H NMR}$  ( $\text{CDCl}_3$ , 400 MHz)  $\delta$  9.02 (s, 1H), 8.04 (s, 1H), 7.98 (s, 1H), 7.86 (s, 1H), 7.75 (d,  $J = 7.44$  Hz, 1H), 7.61 (s, 1H), 7.56 (t,  $J = 7.30$  Hz, 1H), 7.37 (t,  $J = 7.36$  Hz, 1H), 7.28 (d,  $J = 7.60$  Hz, 1H);  $^{13}\text{C NMR}$  ( $\text{CDCl}_3$ , 100 MHz)  $\delta$  195.91, 142.41, 138.66, 133.69, 130.09 (q,  $J = 32.70$  Hz), 129.11, 129.04, 128.31, 126.81, 126.30, 122.74, 122.54 (q,  $J = 271.03$  Hz), 122.50, 120.02;  $^{19}\text{F NMR}$  (377 MHz,  $\text{CDCl}_3$ )  $\delta$  -62.65; **HR-MS** ( $\text{ESI}^+$ ): calcd. for  $\text{C}_{14}\text{H}_9\text{ClF}_3\text{NS}$   $[\text{M}+\text{H}]^+$ : 316.0169, Found: 316.0172.

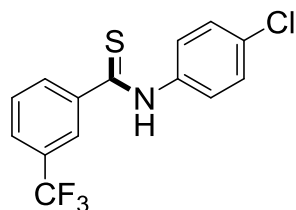

**N-(4-chlorophenyl)-3-(trifluoromethyl)benzothioamide (3ej).** Prepared according to the general procedure to afford a yellow solid in 66% yield, mp 102 °C;  $^1\text{H NMR}$  ( $\text{CDCl}_3$ , 400 MHz)  $\delta$  9.02 (s, 1H), 8.04 (s, 1H), 7.99 (d,  $J = 7.44$  Hz, 1H), 7.75 (d, 7.40 Hz, 1H), 7.69 (d,  $J = 8.12$  Hz, 2H), 7.56 (t,  $J = 7.56$  Hz, 1H), 7.40 (d,  $J = 8.24$  Hz, 2H);  $^{13}\text{C NMR}$  ( $\text{CDCl}_3$ , 100 MHz)  $\delta$  195.78, 142.33, 136.07, 131.48, 130.07 (q,  $J = 32.37$  Hz), 129.02, 128.31, 128.25, 126.84, 124.08, 122.55 (q,  $J = 270.97$  Hz), 122.47;  $^{19}\text{F NMR}$  (377 MHz,  $\text{CDCl}_3$ )  $\delta$  -62.63; **HR-MS** ( $\text{ESI}^+$ ): calcd. for  $\text{C}_{14}\text{H}_9\text{ClF}_3\text{NS}$   $[\text{M}+\text{H}]^+$ : 316.0169, Found: 316.0171.

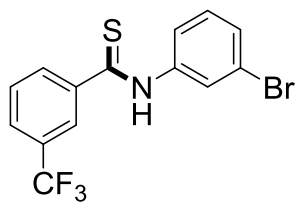

**N-(3-bromophenyl)-3-(trifluoromethyl)benzothioamide (3ek).** Prepared according to the general procedure to afford a yellow solid in 62% yield, mp 103 °C;  $^1\text{H NMR}$  ( $\text{CDCl}_3$ , 400 MHz)  $\delta$  9.03 (s, 1H), 8.03 (s, 1H), 7.97 (s, 1H), 7.75 (d,  $J = 7.44$  Hz, 1H), 7.67 (s, 1H), 7.56 (t,  $J = 7.40$  Hz, 1H), 7.43 (d,  $J = 7.64$  Hz, 1H), 7.30 (t,  $J = 7.44$  Hz, 1H);  $^{13}\text{C NMR}$  ( $\text{CDCl}_3$ , 100 MHz)  $\delta$  196.93, 143.38, 139.76, 131.13 (q,  $J_{\text{C-F}} = 32.78$  Hz), 130.40, 130.25, 130.03, 129.35, 127.86, 126.64, 123.56 (q,  $J_{\text{C-F}} = 270.76$  Hz), 123.54, 122.51, 122.37;  $^{19}\text{F NMR}$  (377 MHz,  $\text{CDCl}_3$ )  $\delta$  -62.64; **HR-MS** ( $\text{ESI}^+$ ): calcd. for  $\text{C}_{14}\text{H}_9\text{BrF}_3\text{NS}$   $[\text{M}+\text{H}]^+$ : 359.9664, Found: 359.9689.

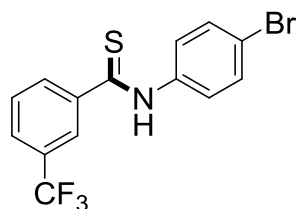

**N-(4-bromophenyl)-3-(trifluoromethyl)benzothioamide**

(3el). Prepared according to the general procedure to afford a yellow solid in 42% yield, mp 100°C;  $^1\text{H NMR}$  ( $\text{CDCl}_3$ , 400 MHz)  $\delta$  9.00 (s, 1H), 8.05 (s, 1H), 8.01 (d,  $J = 7.44$  Hz, 1H), 7.76 (d, 7.32 Hz, 1H), 7.66 (d,  $J = 8.04$  Hz, 2H), 7.56 (t,  $J = 7.80$  Hz, 3H);  $^{13}\text{C NMR}$  ( $\text{CDCl}_3$ , 100 MHz)  $\delta$  195.71, 142.42, 136.63, 131.22, 130.05 (q,  $J = 32.69$  Hz), 129.07, 128.31, 126.82, 124.27, 122.53 (q,  $J = 270.93$  Hz), 122.45, 119.31;  $^{19}\text{F NMR}$  (377 MHz,  $\text{CDCl}_3$ )  $\delta$  -62.63; **HR-MS** ( $\text{ESI}^+$ ): calcd. for  $\text{C}_{14}\text{H}_9\text{BrF}_3\text{NS}$   $[\text{M}+\text{H}]^+$ : 359.9664, Found: 359.9660.

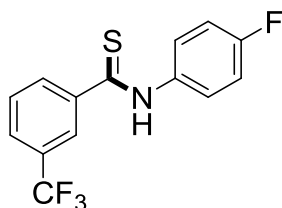

**N-(4-fluorophenyl)-3-(trifluoromethyl)benzothioamide**

(3em). Prepared according to the general procedure to afford a yellow solid in 93% yield, mp 89°C;  $^1\text{H NMR}$  ( $\text{CDCl}_3$ , 400 MHz)  $\delta$  9.06 (s, 1H), 8.05 (s, 1H), 7.99 (d,  $J = 7.80$  Hz, 1H), 7.74 (d, 7.68 Hz, 1H), 7.66 (m, 2H), 7.56 (t,  $J = 7.78$  Hz, 1H), 7.13 (t,  $J = 8.52$  Hz, 2H);  $^{13}\text{C NMR}$  ( $\text{CDCl}_3$ , 100 MHz)  $\delta$  197.10, 161.04 (d,  $J_{\text{C-F}} = 246.61$  Hz), 143.31, 134.68 (d,  $J_{\text{C-F}} = 2.98$  Hz), 131.10 (q,  $J_{\text{C-F}} = 32.75$  Hz), 130.12, 129.32, 127.79 (q,  $J_{\text{C-F}} = 3.56$  Hz), 126.10 (d, 8.02 Hz), 123.61 (q,  $J_{\text{C-F}} = 270.90$  Hz), 123.51 (d,  $J_{\text{C-F}} = 3.63$  Hz), 116.06 (d,  $J_{\text{C-F}} = 22.60$  Hz);  $^{19}\text{F NMR}$  (377 MHz,  $\text{CDCl}_3$ )  $\delta$  -62.62, -113.09; **HR-MS** ( $\text{ESI}^+$ ): calcd. for  $\text{C}_{14}\text{H}_9\text{F}_4\text{NS}$   $[\text{M}+\text{H}]^+$ : 300.0465, Found: 300.0467.

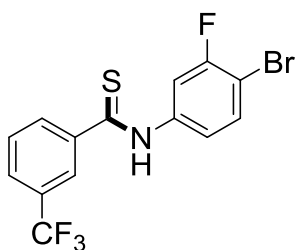

**N-(4-bromo-3-fluorophenyl)-3-(trifluoromethyl)benzothioamide (3en)**

Prepared according to the general procedure to afford a yellow solid in 42% yield, mp 70 °C;  $^1\text{H NMR}$  ( $\text{CDCl}_3$ , 400 MHz)  $\delta$  8.97 (s, 1H), 7.96 (s, 1H), 7.91 (d,  $J = 5.32$  Hz, 1H), 7.85 (s, 1H), 7.69 (d,  $J = 7.68$  Hz, 1H), 7.51 (q,  $J = 8.51$  Hz, 2H), 7.28 (s, 1H);  $^{13}\text{C NMR}$  ( $\text{CDCl}_3$ , 100 MHz)  $\delta$  195.80, 157.89 (d,  $J_{\text{C-F}} = 246.45$  Hz), 142.38, 138.13 (d,  $J_{\text{C-F}} = 9.23$  Hz), 132.64, 130.20 (q,  $J_{\text{C-F}} = 32.75$  Hz), 129.01, 128.39, 126.93 (q,  $J_{\text{C-F}} = 3.47$  Hz), 122.51 (q,  $J_{\text{C-F}} = 271.06$  Hz), 122.46, 119.04 (d,  $J_{\text{C-F}} = 3.57$  Hz), 110.73 (d,  $J_{\text{C-F}} = 26.47$  Hz), 105.76 (d,  $J_{\text{C-F}} = 21.14$  Hz);  $^{19}\text{F NMR}$  (377 MHz,  $\text{CDCl}_3$ )  $\delta$  -62.68, 103.99; **HR-MS** ( $\text{ESI}^+$ ): calcd. for  $\text{C}_{14}\text{H}_8\text{BrF}_4\text{NS}$   $[\text{M}+\text{H}]^+$ : 377.9570, Found: 377.9567.

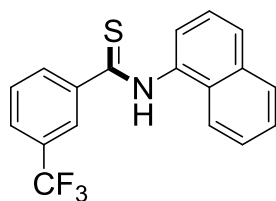

**N-(naphthalen-1-yl)benzothioamide(3eo)**

Prepared according to the general procedure to afford a yellow solid in 98% yield, mp 120°C;  $^1\text{H NMR}$  ( $\text{CDCl}_3$ , 400 MHz)  $\delta$  9.23 (s, 1H), 8.25 (s, 1H), 8.17 (d,  $J = 7.64$  Hz, 1H), 7.95-7.89 (m, 2H), 7.86 (q,  $J = 2.97$  Hz, 1H), 7.80 (d,  $J = 7.84$  Hz, 1H), 7.76 (d,  $J = 7.28$  Hz, 1H), 7.62 (t,  $J = 7.86$  Hz, 1H), 7.59-7.53 (m, 3H);  $^{13}\text{C NMR}$  ( $\text{CDCl}_3$ , 100 MHz)  $\delta$  198.76, 142.69, 134.61, 134.33, 131.21 (q,  $J_{\text{C-F}} = 32.72$  Hz), 130.07, 129.37, 128.88, 128.73, 127.94, 127.10, 125.63, 125.46, 124.79, 123.82, 123.67 (q,  $J_{\text{C-F}} = 273.57$  Hz), 121.70, 105.32;  $^{19}\text{F NMR}$  (377 MHz,  $\text{CDCl}_3$ )  $\delta$  -62.56; **HR-MS** ( $\text{ESI}^+$ ): calcd. for  $\text{C}_{18}\text{H}_{12}\text{F}_3\text{NS}$   $[\text{M}+\text{H}]^+$ : 332.0715, Found: 332.0715.

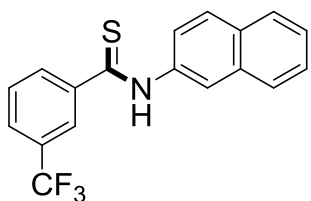

**N-(naphthalen-2-yl)-3-(trifluoromethyl)benzothioamide**

**(3ep)**. Prepared according to the general procedure to afford a yellow solid in 49% yield, mp 106 °C;  $^1\text{H NMR}$  ( $\text{CDCl}_3$ , 400 MHz)  $\delta$  9.14 (s, 1H), 8.29 (s, 1H), 8.03 (s, 1H), 7.96 (d,  $J = 7.52$  Hz, 1H), 7.81 (d,  $J = 8.80$  Hz, 1H), 7.76 (d,  $J = 2.36$

Hz, 2H), 7.68 (d,  $J = 7.48$  Hz, 1H), 7.62 (d,  $J = 8.40$  Hz, 2H), 7.49 (t,  $J = 7.72$  Hz, 1H), 7.43 (q,  $J = 3.11$  Hz, 2H);  $^{13}\text{C NMR}$  ( $\text{CDCl}_3$ , 100 MHz)  $\delta$  195.52, 142.62, 135.10, 132.27, 131.09, 130.05 (q,  $J_{\text{C-F}} = 32.82$  Hz), 129.05, 128.27, 127.93, 126.99, 126.75, 126.67, 125.80, 125.47, 122.60 (q,  $J_{\text{C-F}} = 271.06$  Hz), 122.57, 121.47, 120.42;  $^{19}\text{F NMR}$  (377 MHz,  $\text{CDCl}_3$ )  $\delta$  -62.56; **HR-MS** ( $\text{ESI}^+$ ): calcd. for  $\text{C}_{18}\text{H}_{12}\text{F}_3\text{NS}$   $[\text{M}+\text{H}]^+$ : 332.0715, Found: 332.0718.

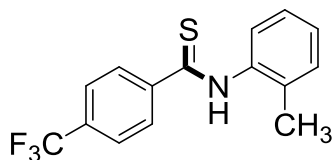

**N-(o-tolyl)-4-(trifluoromethyl)benzothioamide**

**(3hb)**. Prepared according to the general procedure to afford a yellow solid in 99% yield, mp 124 °C;  $^1\text{H NMR}$  ( $\text{CDCl}_3$ , 400 MHz)  $\delta$  8.81 (s, 1H), 7.88 (d,  $J = 7.84$  Hz, 2H), 7.61 (d,  $J = 8.00$  Hz, 2H), 7.44 (s, 1H), 7.23 (d,  $J = 3.16$  Hz,

3H), 2.24 (s, 3H);  $^{13}\text{C NMR}$  ( $\text{CDCl}_3$ , 100 MHz)  $\delta$  196.92, 144.06, 136.11, 133.14, 131.79 (q,  $J = 32.63$  Hz), 130.12, 127.43, 126.16, 126.87, 125.56, 124.64 (q,  $J = 3.65$  Hz), 122.65 (q,  $J = 270.56$  Hz), 16.86;  $^{19}\text{F NMR}$  (377 MHz,  $\text{CDCl}_3$ )  $\delta$  -62.88; **HR-MS** ( $\text{ESI}^+$ ): calcd. for  $\text{C}_{15}\text{H}_{11}\text{F}_3\text{NS}$   $[\text{M}+\text{H}]^+$ : 296.0715, Found: 296.0719.

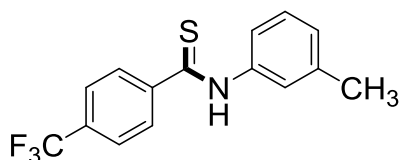

**N-(m-tolyl)-4-(trifluoromethyl)benzothioamide**

**(3hc)**. Prepared according to the general procedure to afford a yellow solid in 99% yield, mp 129 °C;  $^1\text{H NMR}$  ( $\text{CDCl}_3$ , 400 MHz)  $\delta$  8.99 (s, 1H), 7.91 (d,  $J =$

7.84 Hz, 2H), 7.68 (d,  $J = 7.72$  Hz, 2H), 7.56 (s, 2H), 7.34 (t,  $J = 7.62$  Hz, 1H), 7.13 (d,  $J = 7.52$  Hz, 1H), 2.40 (s, 3H);  $^{13}\text{C NMR}$  ( $\text{CDCl}_3$ , 100 MHz)  $\delta$  196.61, 146.18, 139.26, 138.54, 132.67 (q,  $J = 30.58$  Hz), 128.99, 128.19, 127.05, 125.69 (q,  $J = 3.77$  Hz), 124.14, 123.65 (q,  $J = 270.75$  Hz), 120.74, 21.44;  $^{19}\text{F NMR}$  (377 MHz,  $\text{CDCl}_3$ )  $\delta$  -62.86; **HR-MS** ( $\text{ESI}^+$ ): calcd. for  $\text{C}_{15}\text{H}_{12}\text{F}_3\text{NS}$   $[\text{M}+\text{H}]^+$ : 296.0715, Found: 296.0717.

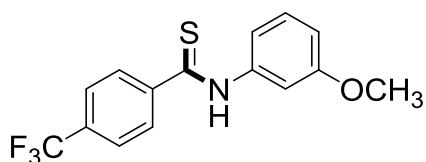

**N-(3-methoxyphenyl)-4-(trifluoromethyl)benzothioamide**

**(3hd)**. Prepared according to the general procedure to afford a yellow solid in 48% yield, mp 122 °C;  $^1\text{H NMR}$  ( $\text{CDCl}_3$ , 400 MHz)  $\delta$

8.98 (s, 1H), 7.81 (d,  $J = 7.20$  Hz, 2H), 7.59 (d,  $J = 7.40$  Hz, 2H), 7.51 (s, 1H), 7.26 (t,  $J = 7.76$  Hz, 1H), 7.13 (d,  $J = 7.48$  Hz, 1H), 6.78 (d,  $J = 7.40$  Hz, 1H), 3.75 (s, 3H);  $^{13}\text{C NMR}$  ( $\text{CDCl}_3$ , 100 MHz)  $\delta$  195.48, 159.06, 145.28, 138.78, 131.65 (q,  $J_{\text{C-F}} = 32.78$  Hz), 128.87, 126.04, 124.66, 122.64 (q,  $J_{\text{C-F}} = 271.09$  Hz), 114.51, 112.00, 108.01, 54.46;  $^{19}\text{F NMR}$  (377 MHz,  $\text{CDCl}_3$ )  $\delta$  -62.88; **HR-MS** ( $\text{ESI}^+$ ): calcd. for

C<sub>15</sub>H<sub>12</sub>F<sub>3</sub>NOS [M+H]<sup>+</sup>: 312.0664, Found: 312.0662.

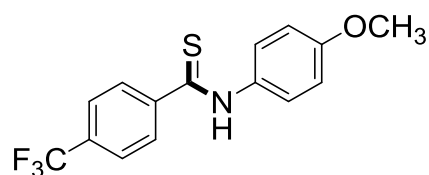

**N-(4-methoxyphenyl)-4-(trifluoromethyl)benzothioamide (3he).** Prepared according to the general procedure to afford a yellow solid in 61% yield, mp 125 °C; <sup>1</sup>H NMR (DMSO-d<sub>6</sub>, 400 MHz) δ 11.89 (s, 1H), 7.97 (d, J = 8.12 Hz, 2H), 7.83 (d,

J = 8.24 Hz, 2H), 7.79 - 7.74 (m, 2H), 7.03 - 6.99 (m, 2H), 3.79 (s, 3H); <sup>13</sup>C NMR (DMSO-d<sub>6</sub>, 100 MHz) δ 195.20, 157.63, 146.45, 132.96, 130.43C (q, J = 31.74 Hz), 128.34, 125.59, 125.26 (q, J = 3.68 Hz), 124.25 (q, J = 271.98 Hz), 113.87, 55.51; <sup>19</sup>F NMR (377 MHz, DMSO-d<sub>6</sub>) δ -61.23; **HR-MS** (ESI<sup>+</sup>): calcd. for C<sub>15</sub>H<sub>12</sub>F<sub>3</sub>NOS [M+H]<sup>+</sup>: 312.0664, Found: 312.0666.

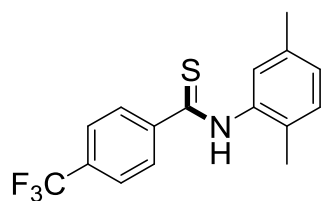

**N-(2,5-dimethylphenyl)-4-(trifluoromethyl)benzothioamide (3hf).** Prepared according to the general procedure to afford a yellow solid in 94% yield, mp 95 °C; <sup>1</sup>H NMR (CDCl<sub>3</sub>, 400 MHz) δ 8.76 (s, 1H), 7.89 (d, J = 7.92 Hz, 2H), 7.62 (d, J = 8.04 Hz, 2H), 7.25 (s, 1H), 7.13 (d, J = 7.76 Hz, 1H), 7.04 (d, J = 7.60 Hz, 1H), 2.29 (s, 3H),

2.20 (s, 3H); <sup>13</sup>C NMR (CDCl<sub>3</sub>, 100 MHz) δ 196.80, 144.18, 135.88, 131.78 (q, J<sub>C-F</sub> = 32.74 Hz), 129.96, 129.93, 128.27, 126.13, 125.87, 124.66 (q, J<sub>C-F</sub> = 3.70 Hz), 122.65 (q, J<sub>C-F</sub> = 270.73 Hz), 19.92, 16.45; <sup>19</sup>F NMR (377 MHz, CDCl<sub>3</sub>) δ -62.89; **HR-MS** (ESI<sup>+</sup>): calcd. for C<sub>16</sub>H<sub>14</sub>F<sub>3</sub>NS [M+H]<sup>+</sup>: 310.0872, Found: 310.0877.

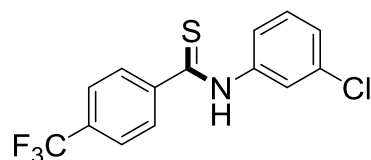

**N-(3-chlorophenyl)-4-(trifluoromethyl)benzothioamide (3hi).**

Prepared according to the general procedure to afford a yellow solid in 90% yield, mp 113°C; <sup>1</sup>H NMR (CDCl<sub>3</sub>, 400 MHz) δ 9.01 (s, 1H), 7.87 (s, 3H), 7.67 (d, J = 7.20 Hz, 2H), 7.61 (d, J =

5.20 Hz, 1H), 7.35 (d, J = 6.84 Hz, 1H), 7.28 (d, J = 7.44 Hz, 1H); <sup>13</sup>C NMR (CDCl<sub>3</sub>, 100 MHz) δ 197.04, 145.86, 139.61, 134.74, 132.90 (q, J<sub>C-F</sub> = 32.66 Hz), 130.17, 127.35, 127.07, 125.75, 123.63, 123.59 (q, J<sub>C-F</sub> = 270.96 Hz), 121.72; <sup>19</sup>F NMR (377 MHz, CDCl<sub>3</sub>) δ -62.90; **HR-MS** (ESI<sup>+</sup>): calcd. for C<sub>14</sub>H<sub>9</sub>ClF<sub>3</sub>NS [M+H]<sup>+</sup>: 316.0169, Found: 316.0167.

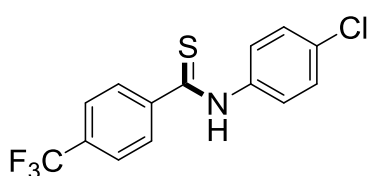

**N-(4-chlorophenyl)-4-(trifluoromethyl)benzothioamide (3hj).**

Prepared according to the general procedure to afford a yellow solid in 71% yield, mp 173°C; <sup>1</sup>H NMR (CDCl<sub>3</sub>, 400 MHz) δ 8.99 (s, 1H), 7.92 (d, J = 7.88 Hz, 2H), 7.72 (dq, J = 8.68 Hz, J =

4.92 Hz, 4H), 7.43 (d, J = 8.40 Hz, 2H); <sup>13</sup>C NMR (CDCl<sub>3</sub>, 100 MHz) δ 195.89, 144.89, 136.09, 131.87 (q, J = 35.84 Hz), 131.45, 128.28, 126.05, 124.73, 123.89, 122.56 (q, J = 271.56 Hz); <sup>19</sup>F NMR (377 MHz, CDCl<sub>3</sub>) δ -62.88; **HR-MS** (ESI<sup>+</sup>):

calcd. for C<sub>14</sub>H<sub>9</sub>ClF<sub>3</sub>NS [M+H]<sup>+</sup>: 316.0169, Found: 316.0173.

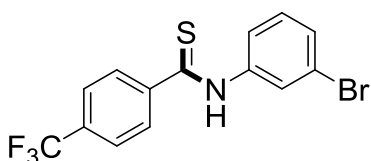

**N-(3-bromophenyl)-4-(trifluoromethyl)benzothioamide (3hk).** Prepared according to the general procedure to afford a yellow solid in 50% yield, mp 98°C; <sup>1</sup>H NMR (CDCl<sub>3</sub>, 400 MHz) δ 9.05 (s, 1H), 7.99 (s, 1H), 7.88 (d, J = 6.60 Hz, 2H), 7.67 (d, J = 7.00 Hz, 3H), 7.43 (d, J = 7.60 Hz, 1H), 7.30 (t, J = 7.34 Hz, 1H); <sup>13</sup>C NMR (CDCl<sub>3</sub>, 100 MHz) δ 196.03, 144.77, 138.72, 131.85 (q, J = 32.12 Hz), 129.37, 129.22, 126.06, 125.47, 124.70 (q, J = 3.92 Hz), 122.58 (q, J = 270.96 Hz), 121.50, 121.23; <sup>19</sup>F NMR (377 MHz, CDCl<sub>3</sub>) δ -62.88; **HR-MS** (ESI<sup>+</sup>): calcd. for C<sub>14</sub>H<sub>9</sub>BrF<sub>3</sub>NS [M+H]<sup>+</sup>: 359.9664, Found: 359.9666.

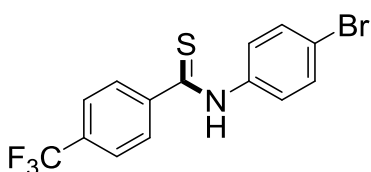

**N-(4-bromophenyl)-4-(trifluoromethyl)benzothioamide (3hl).** Prepared according to the general procedure to afford a yellow solid in 74% yield, mp 126-127°C; <sup>1</sup>H NMR (CDCl<sub>3</sub>, 400 MHz) δ 8.98 (s, 1H), 7.91 (d, J = 7.68 Hz, 2H), 7.69 (t, J = 6.70 Hz, 4H), 7.57 (d, J = 8.32 Hz, 2H); <sup>13</sup>C NMR (CDCl<sub>3</sub>, 100 MHz) δ 195.82, 144.93, 136.62, 131.88 (q, J = 30.19 Hz), 131.24, 126.03, 124.73 (q, J = 3.59 Hz), 124.10, 121.51 (q, J = 270.83 Hz), 119.28; <sup>19</sup>F NMR (377 MHz, CDCl<sub>3</sub>) δ -62.89; **HR-MS** (ESI<sup>+</sup>): calcd. for C<sub>14</sub>H<sub>9</sub>BrF<sub>3</sub>NS [M+H]<sup>+</sup>: 359.9664, Found: 359.9662.

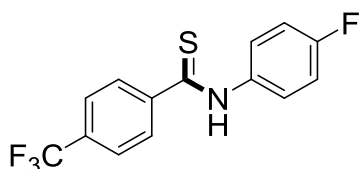

**N-(4-fluorophenyl)-4-(trifluoromethyl)benzothioamide (3hm).** Prepared according to the general procedure to afford a yellow solid in 98% yield, mp 180°C; <sup>1</sup>H NMR (CDCl<sub>3</sub>, 400 MHz) δ 8.91 (s, 1H), 7.85 (d, J = 7.80 Hz, 2H), 7.62 (t, J = 7.32 Hz, 4H), 7.08 (t, J = 8.24 Hz, 2H); <sup>13</sup>C NMR (CDCl<sub>3</sub>, 100 MHz) δ 196.17, 159.99 (d, J = 246.61 Hz), 144.76, 133.57 (d, J = 2.85 Hz), 131.84 (q, J = 32.60 Hz), 126.05, 124.92 (d, J = 8.24 Hz), 124.73 (d, J = 3.55 Hz), 122.59 (q, J = 270.90 Hz), 115.06 (d, J = 22.71 Hz); <sup>19</sup>F NMR (377 MHz, CDCl<sub>3</sub>) δ -62.91, -113.02; **HR-MS** (ESI<sup>+</sup>): calcd. for C<sub>14</sub>H<sub>9</sub>F<sub>4</sub>NS [M+H]<sup>+</sup>: 300.0465, Found: 300.0459.

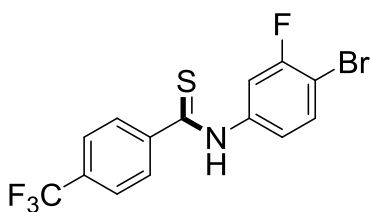

**N-(4-bromo-3-fluorophenyl)-4-(trifluoromethyl)benzothioamide (3hn).** Prepared according to the general procedure to afford a yellow solid in 86% yield, mp 146°C; <sup>1</sup>H NMR (CDCl<sub>3</sub>, 400 MHz) δ 9.01 (s, 1H), 7.88 (d, J = 4.8 Hz, 3H), 7.68 (d, J = 7.88 Hz, 2H), 7.59 (t, J = 7.66 Hz, 1H), 7.35 (d, J = 12.60 Hz, 1H); <sup>13</sup>C NMR (CDCl<sub>3</sub>, 100 MHz) δ 196.96, 158.90 (d, J<sub>C-F</sub> = 246.61 Hz), 139.08 (d, J<sub>C-F</sub> = 9.71 Hz), 133.67, 133.00 (q, J<sub>C-F</sub> = 32.94 Hz), 127.06, 125.81 (d, J<sub>C-F</sub> = 3.59 Hz), 123.56 (q, J<sub>C-F</sub> = 270.97 Hz), 119.94 (d, J<sub>C-F</sub> = 3.59 Hz),

111.74, 111.47, 106.77 (d,  $J_{C-F} = 21.11$  Hz);  $^{19}\text{F}$  NMR (377 MHz,  $\text{CDCl}_3$ )  $\delta$  -62.93, -103.92; **HR-MS** ( $\text{ESI}^+$ ): calcd. for  $\text{C}_{14}\text{H}_8\text{BrF}_4\text{NS}$   $[\text{M}+\text{H}]^+$ : 377.9570, Found: 377.9577.

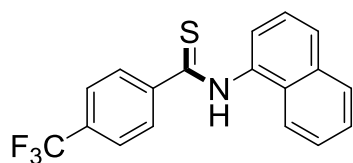

**N-(naphthalen-1-yl)-4-(trifluoromethyl)benzothioamide (3ho)**. Prepared according to the general procedure to afford a yellow solid in 52% yield, mp 150 °C;  $^1\text{H}$  NMR ( $\text{CDCl}_3$ , 400 MHz)  $\delta$  9.25 (s, 1H), 8.06 (d,  $J = 8.00$  Hz, 2H), 7.95 - 7.88 (m, 2H), 7.84 (t,  $J = 4.50$  Hz, 1H), 7.76 (d,  $J = 7.28$  Hz, 1H), 7.72 (d,  $J = 8.08$  Hz, 2H), 7.55 (t,  $J = 7.84$  Hz, 3H);  $^{13}\text{C}$  NMR ( $\text{CDCl}_3$ , 100 MHz)  $\delta$  198.89, 145.07, 134.53, 134.33, 132.94 (q,  $J_{C-F} = 32.20$  Hz), 128.91, 128.84, 128.66, 127.26, 127.09, 126.63, 125.75 (q,  $J_{C-F} = 3.66$  Hz), 125.45, 124.71, 123.68 (q,  $J_{C-F} = 271.04$  Hz), 121.63;  $^{19}\text{F}$  NMR (377 MHz,  $\text{CDCl}_3$ )  $\delta$  -62.84; **HR-MS** ( $\text{ESI}^+$ ): calcd. for  $\text{C}_{18}\text{H}_{12}\text{F}_3\text{NS}$   $[\text{M}+\text{H}]^+$ : 332.0715, Found: 332.0720.

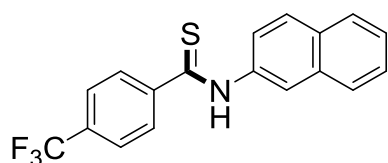

**N-(naphthalen-1-yl)-4-(trifluoromethyl)benzothioamide (3hp)**. Prepared according to the general procedure to afford a yellow solid in 58% yield, mp 185 °C;  $^1\text{H}$  NMR ( $\text{DMSO-d}_6$ , 400 MHz)  $\delta$  12.21 (s, 1H), 8.56 (d,  $J = 1.84$  Hz, 2H), 7.99 (d,  $J = 8.88$  Hz, 1H), 7.94 (q,  $J = 2.57$  Hz, 2H), 7.87 (dd,  $J = 1.72$  Hz,  $J = 8.60$  Hz, 3H), 7.56-7.53 (m, 2H);  $^{13}\text{C}$  NMR ( $\text{DMSO-d}_6$ , 100 MHz)  $\delta$  196.61, 146.65, 137.86, 133.25, 131.88, 130.88 (q,  $J_{C-F} = 31.79$  Hz), 129.29 (d,  $J_{C-F} = 12.41$  Hz), 128.69, 128.62, 128.31, 128.07, 127.06, 126.65, 125.60 (q,  $J_{C-F} = 3.72$  Hz), 124.49, 123.90;  $^{19}\text{F}$  NMR (377 MHz,  $\text{CDCl}_3$ )  $\delta$  -61.21; **HR-MS** ( $\text{ESI}^+$ ): calcd. for  $\text{C}_{18}\text{H}_{12}\text{F}_3\text{NS}$   $[\text{M}+\text{H}]^+$ : 332.0715, Found: 322.0716.

## 8. NMR spectra

### Compound 3aa



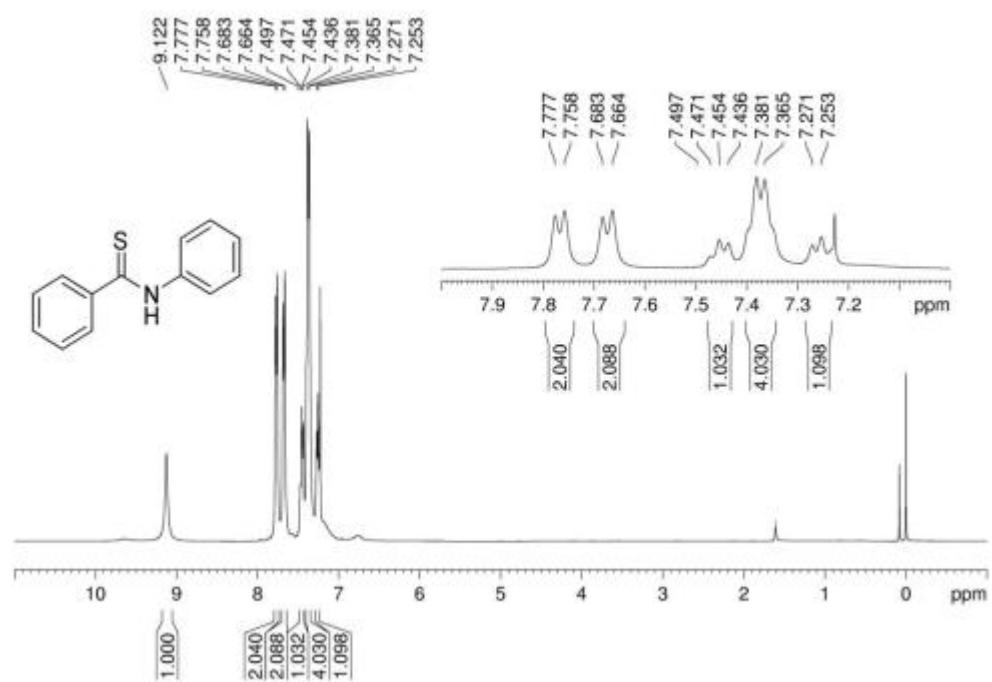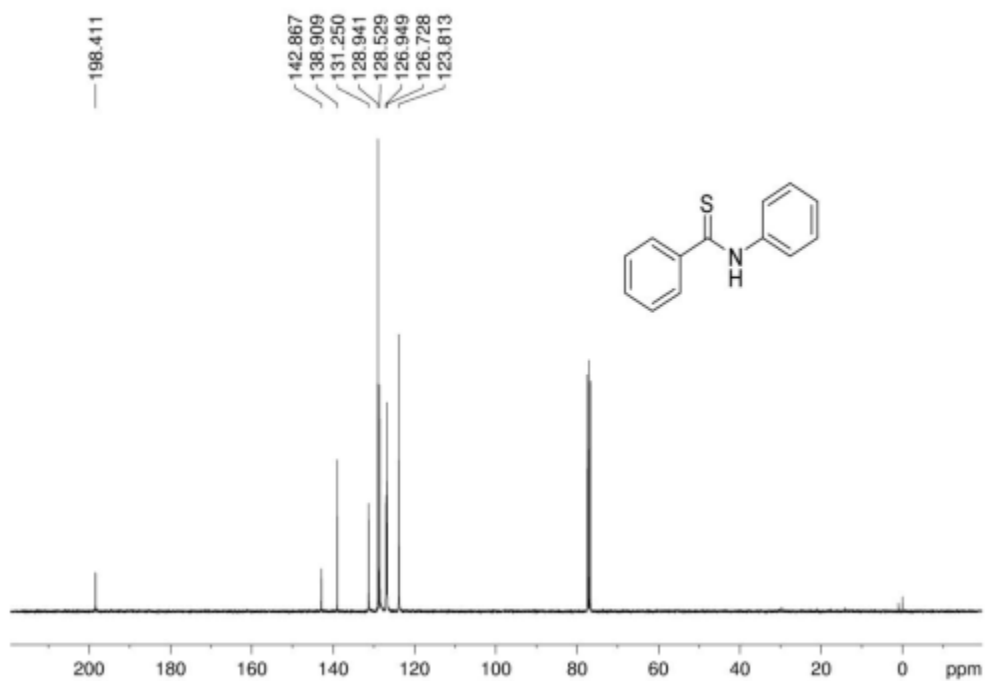

**Compound 3ab**

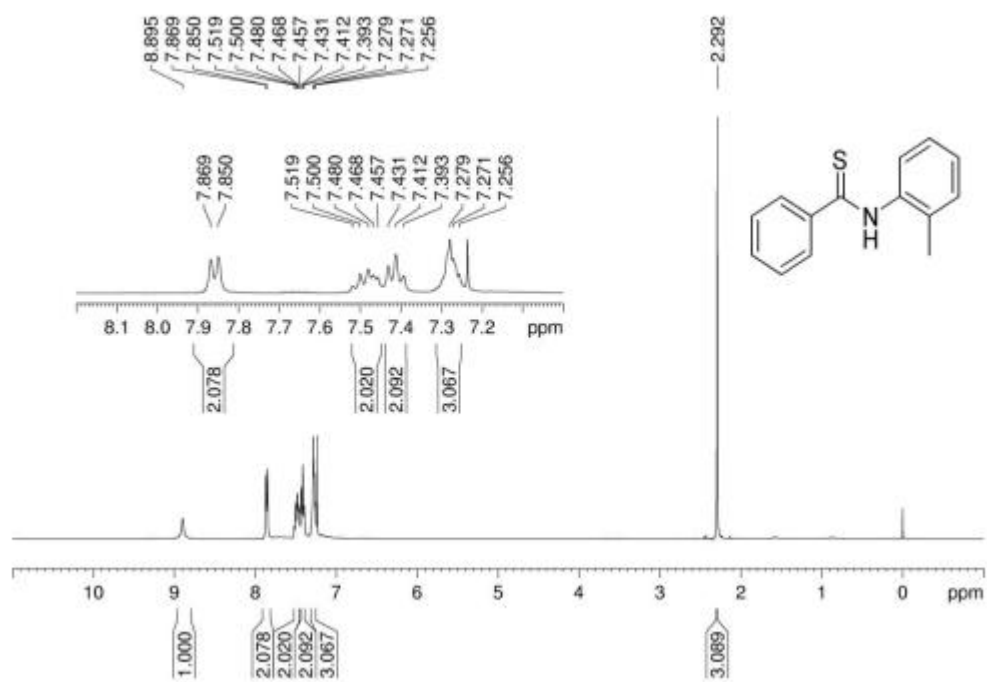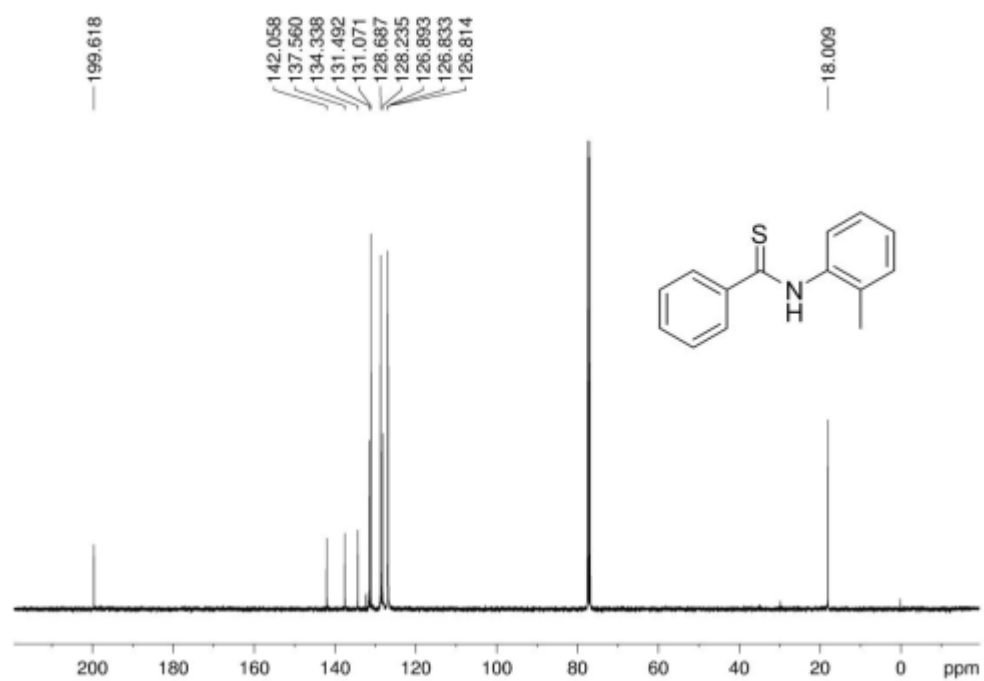

**Compound 3ac**

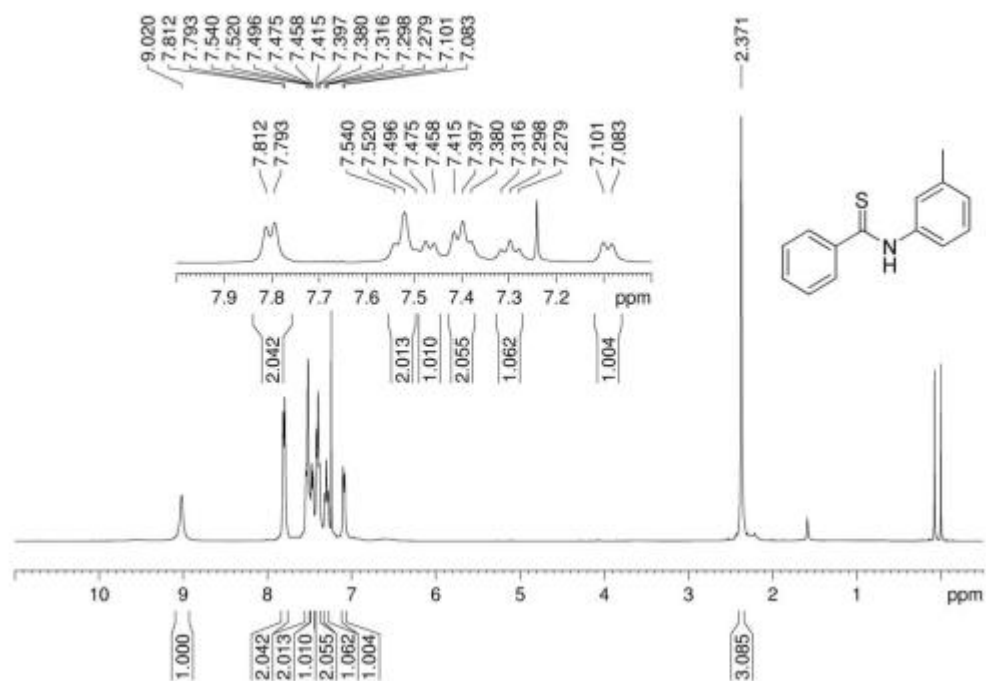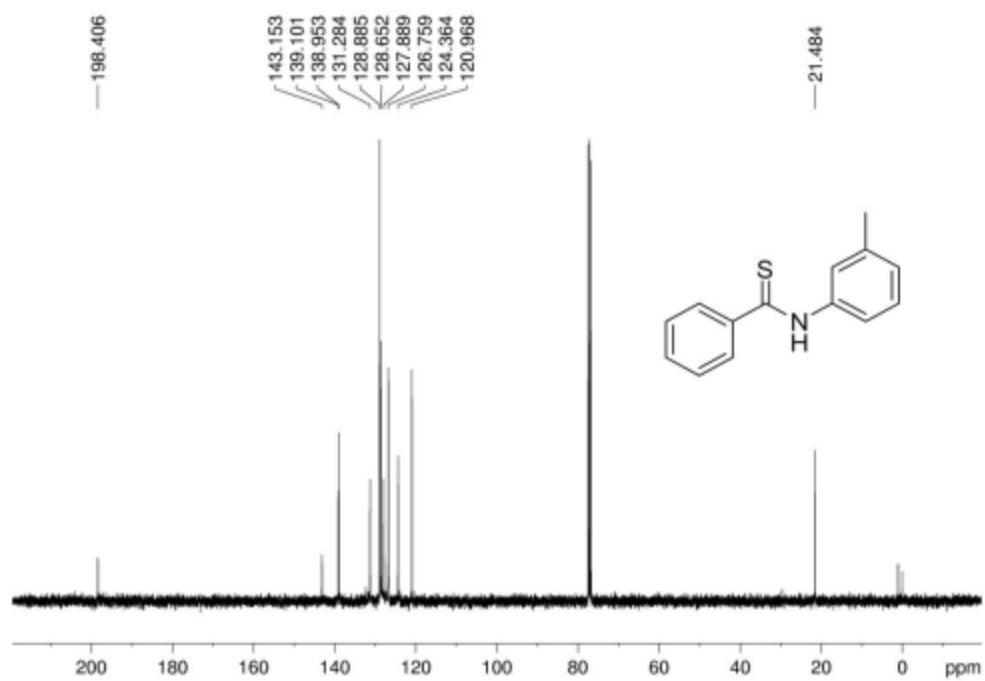

**Compound 3ad**

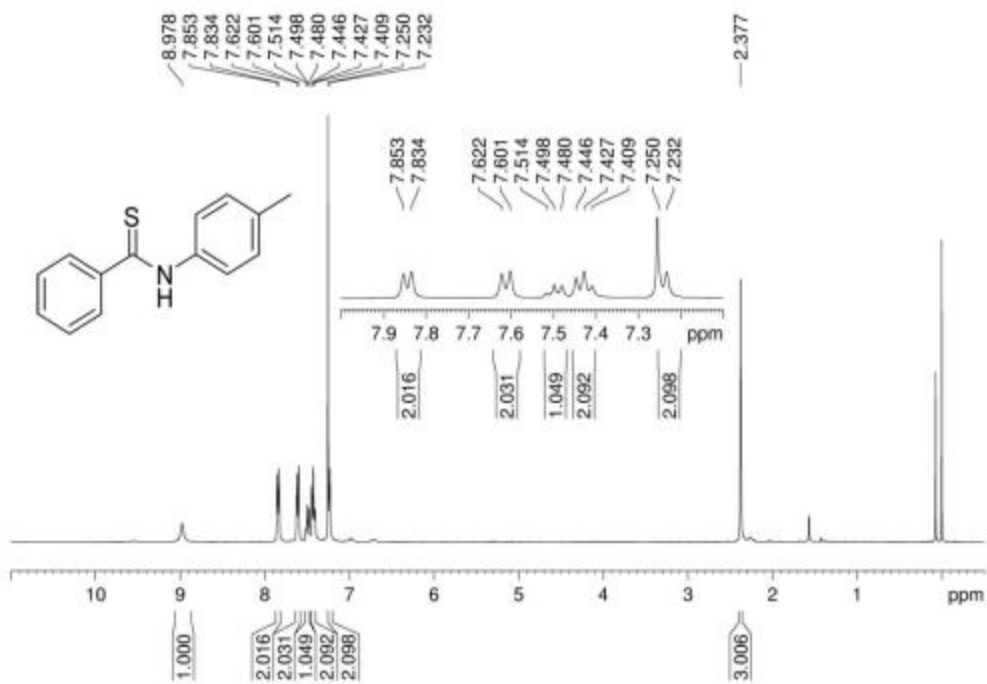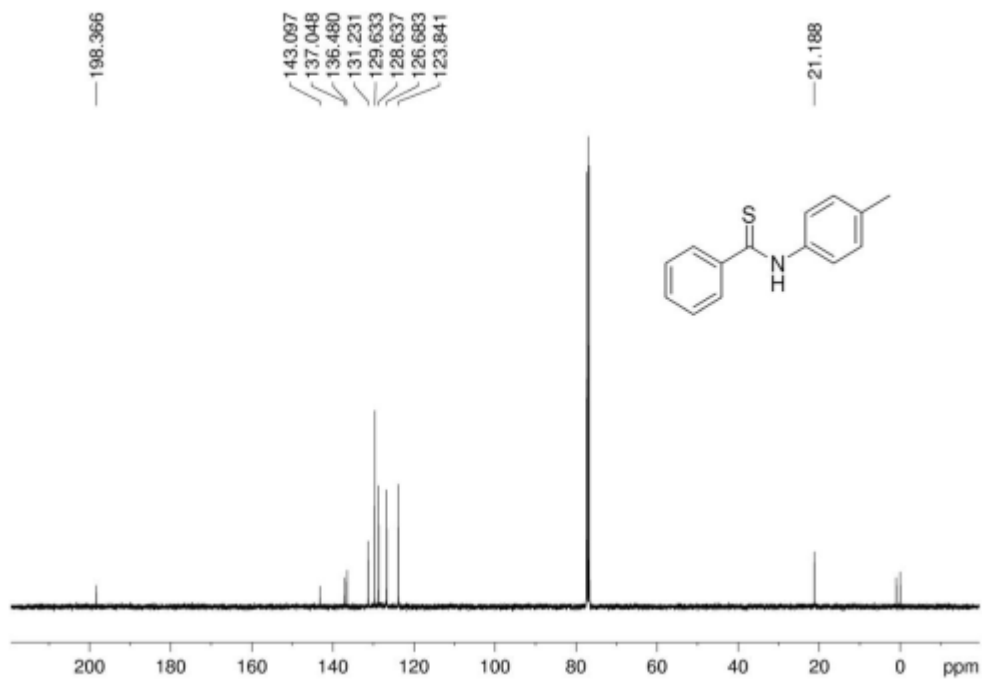

**Compound 3ae**

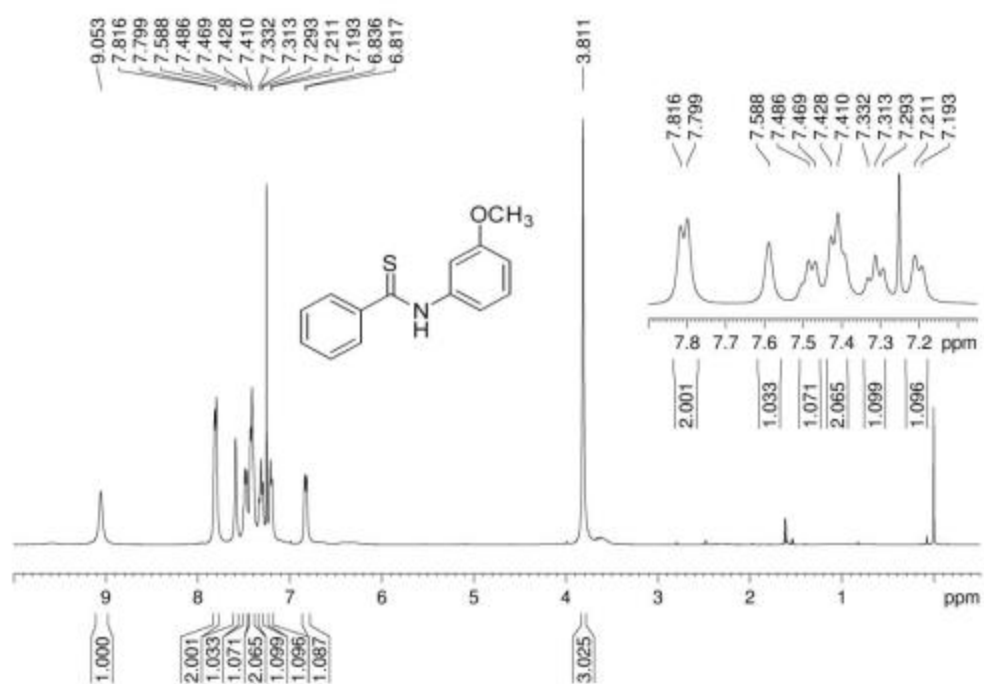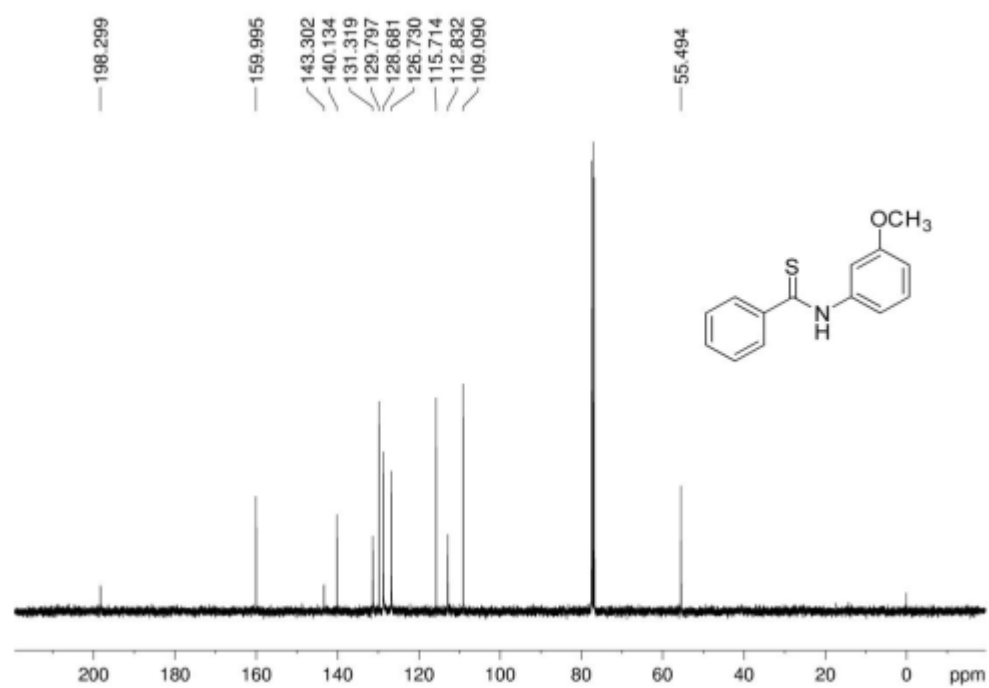

**Compound 3af**

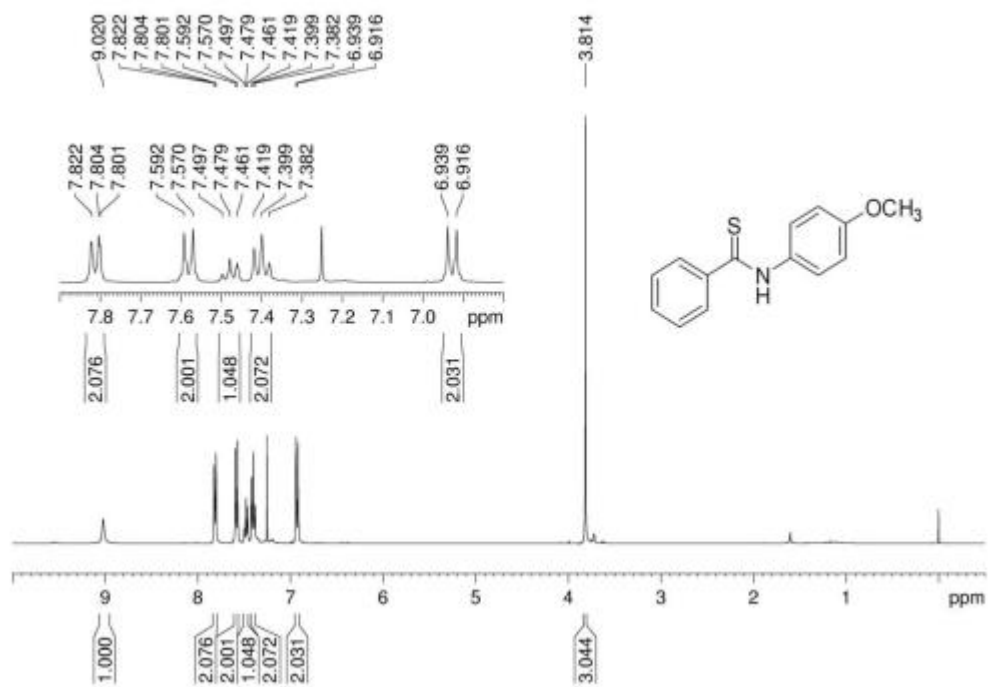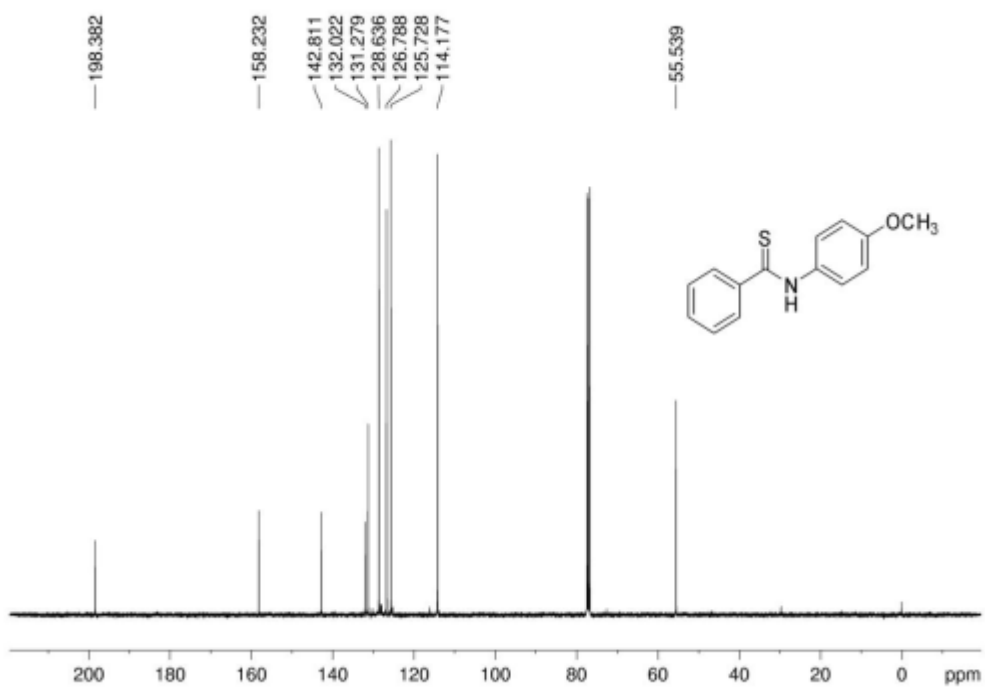

**Compound 3ag**

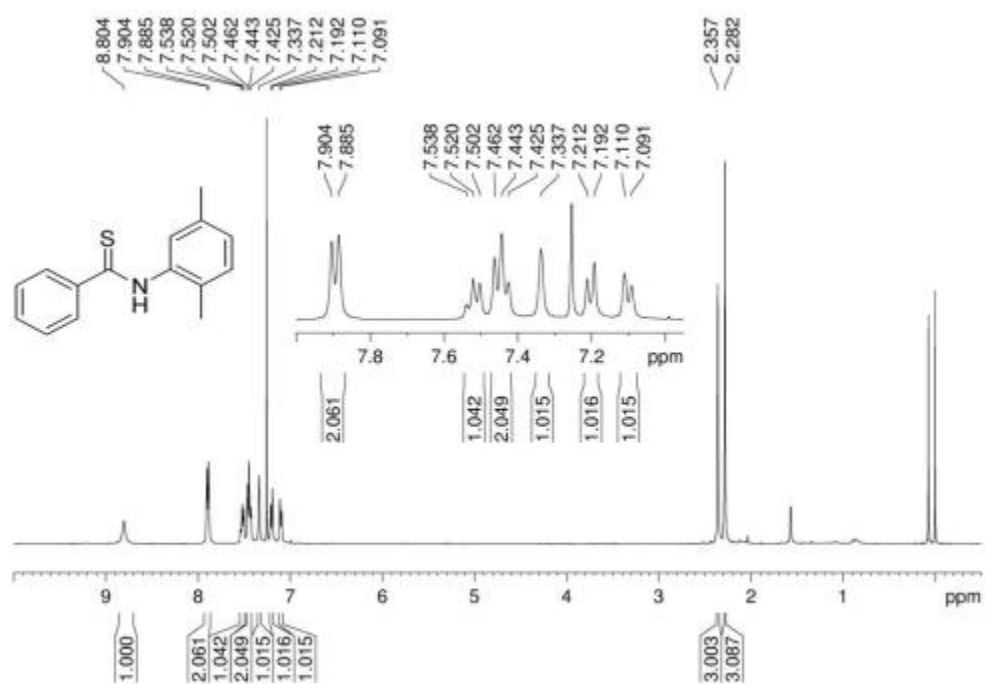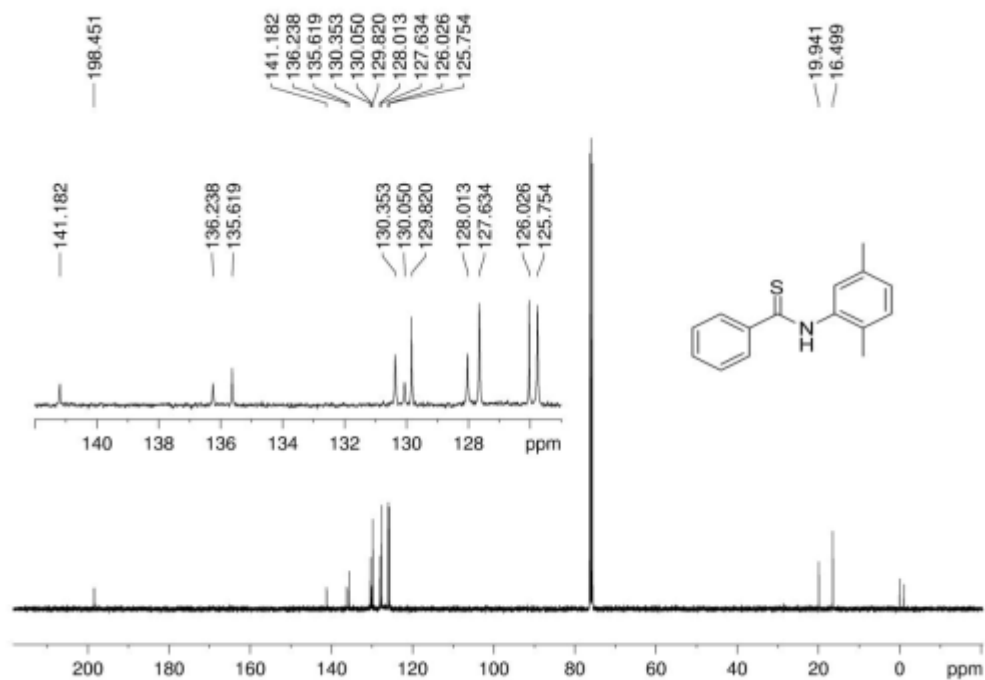

**Compound 3ah**

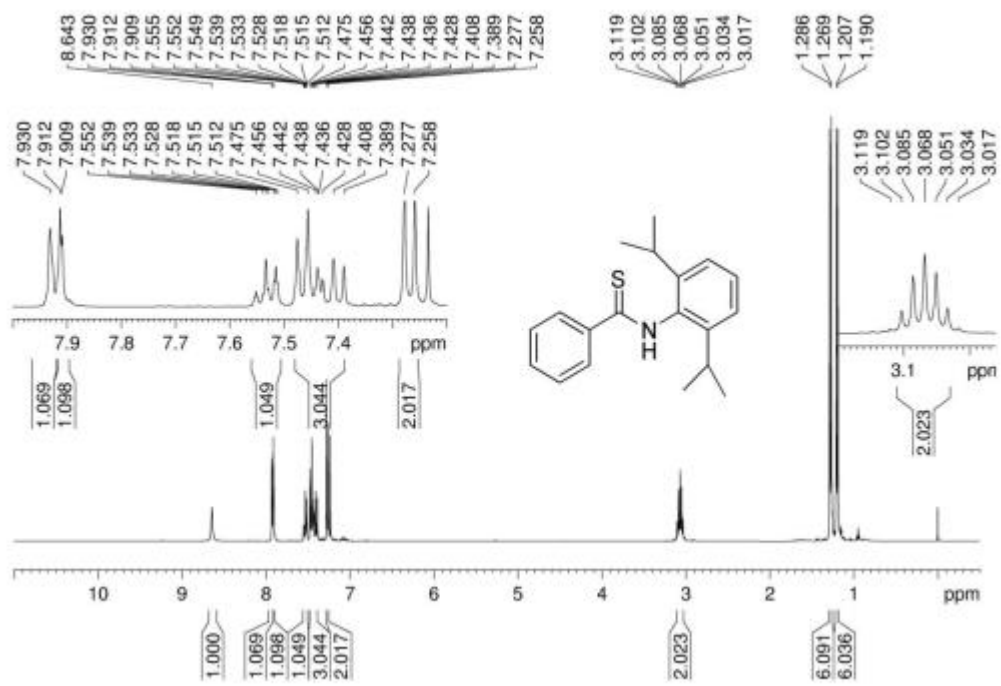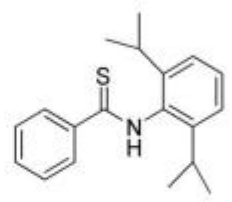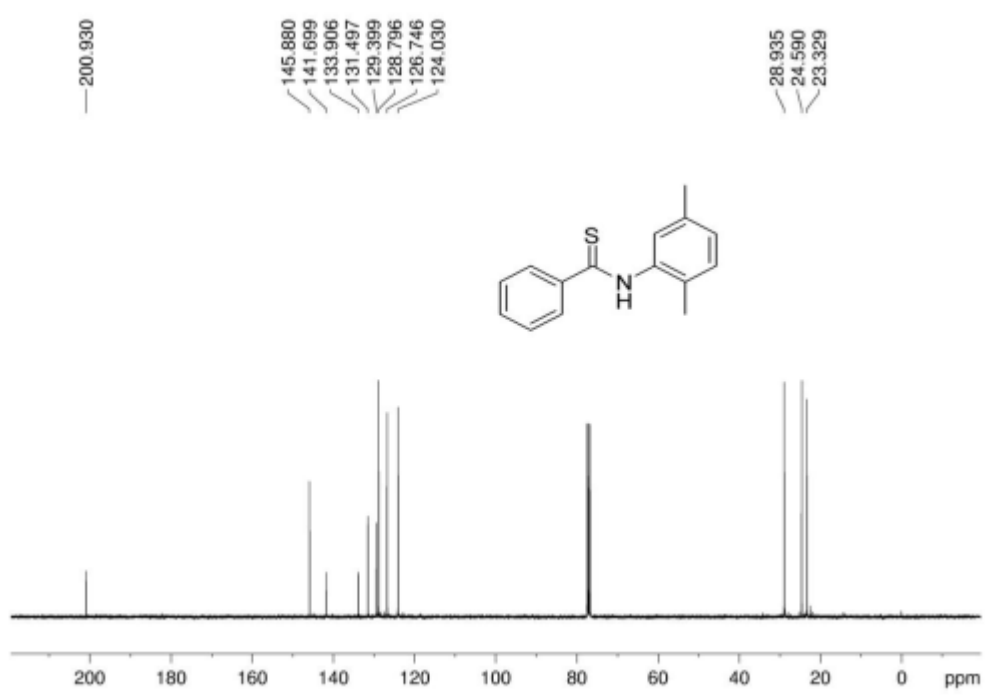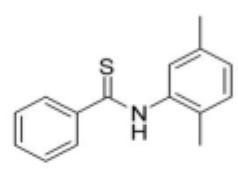

**Compound 3ai**



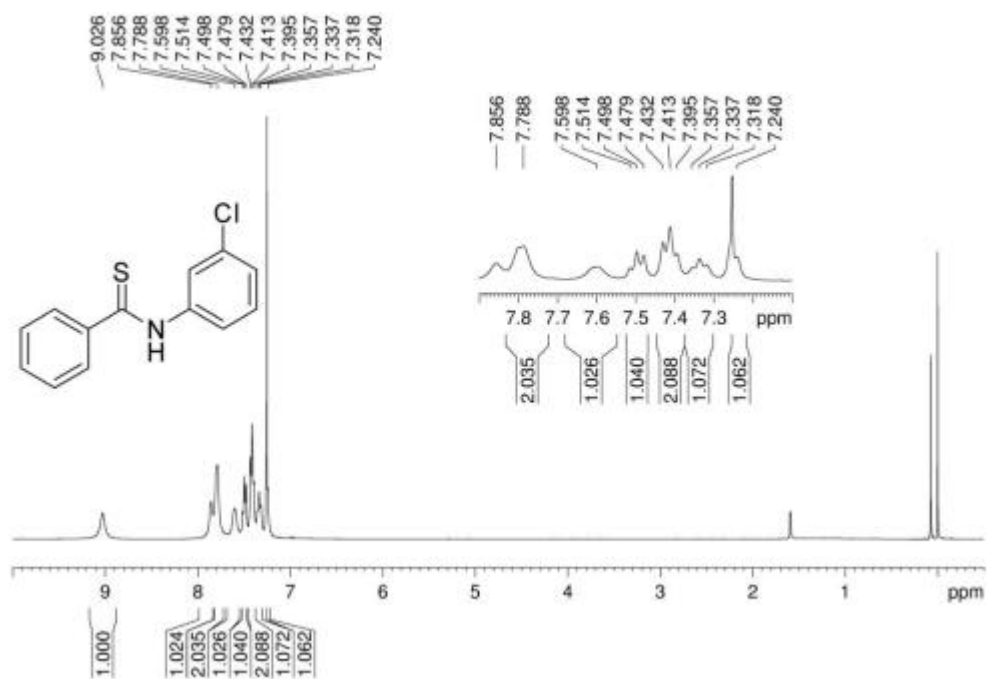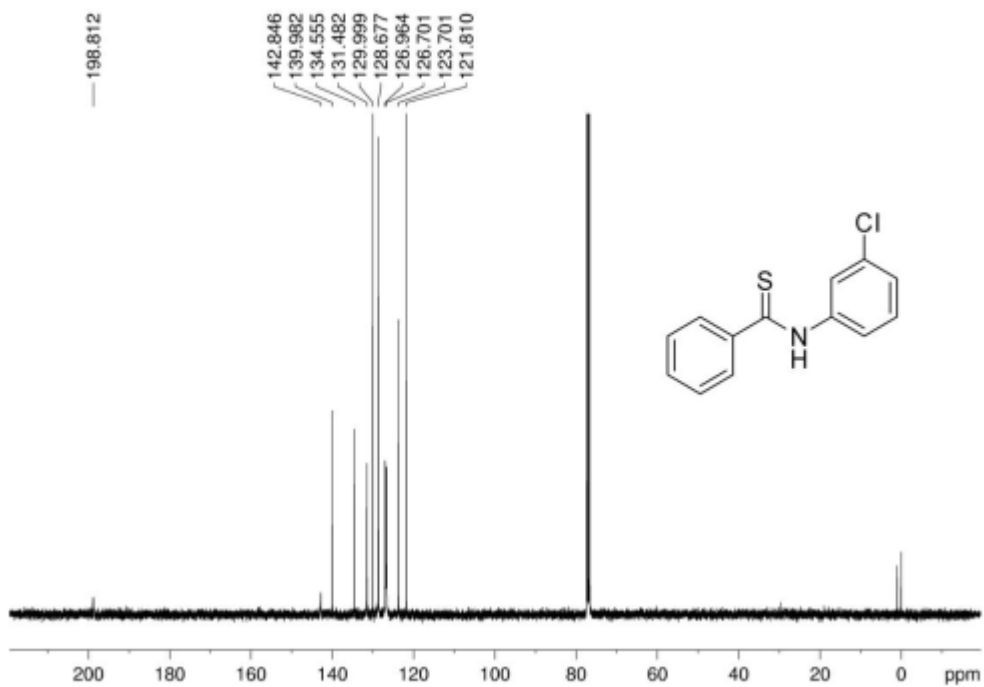

**Compound 3aj**

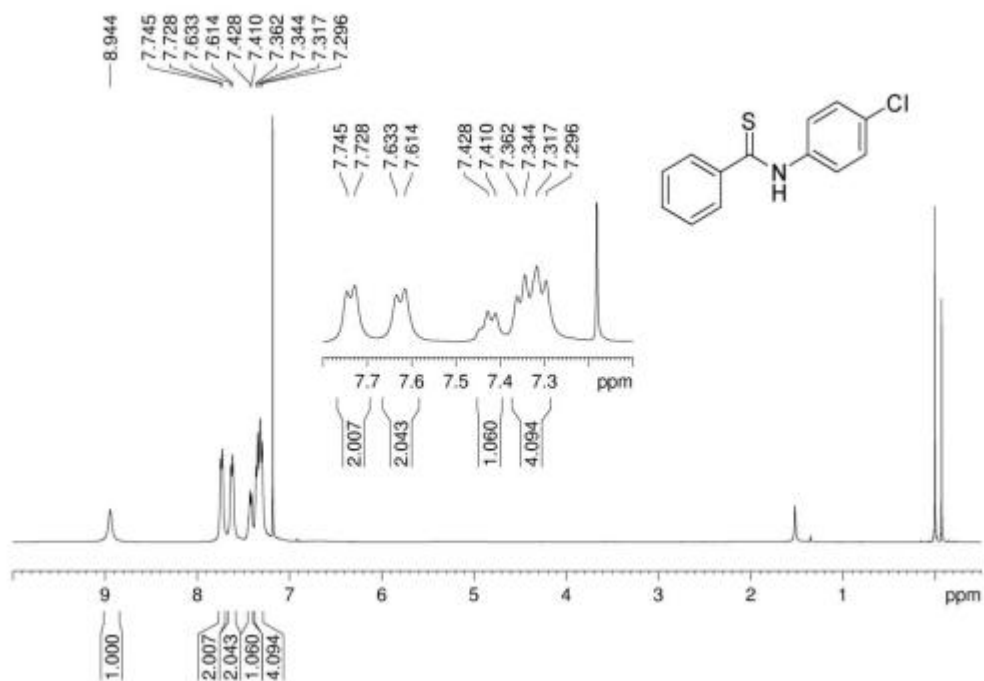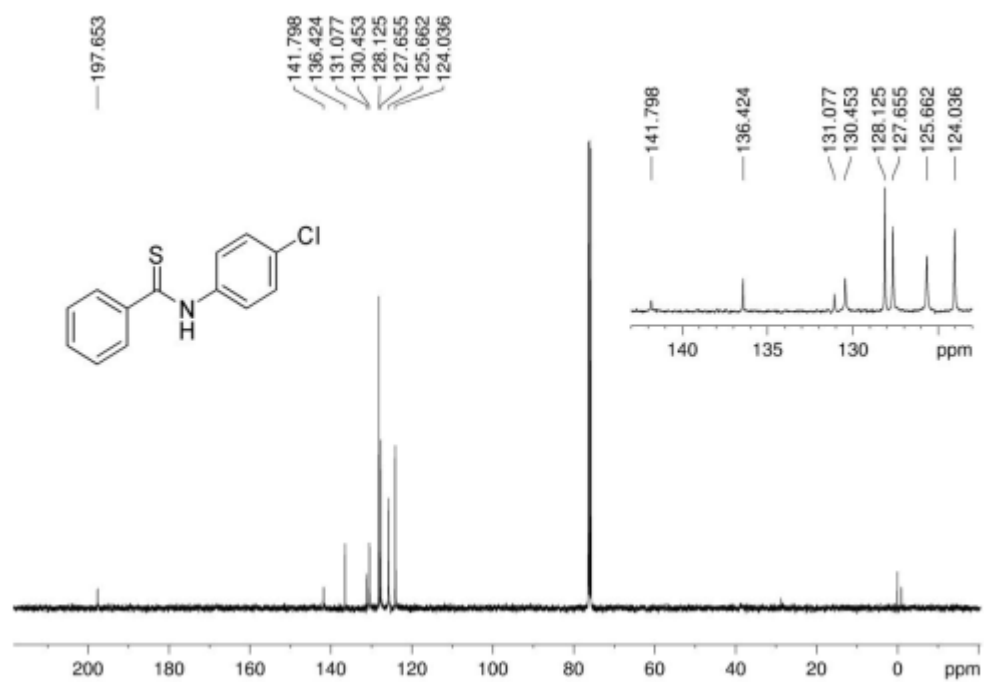

**Compound 3ak**

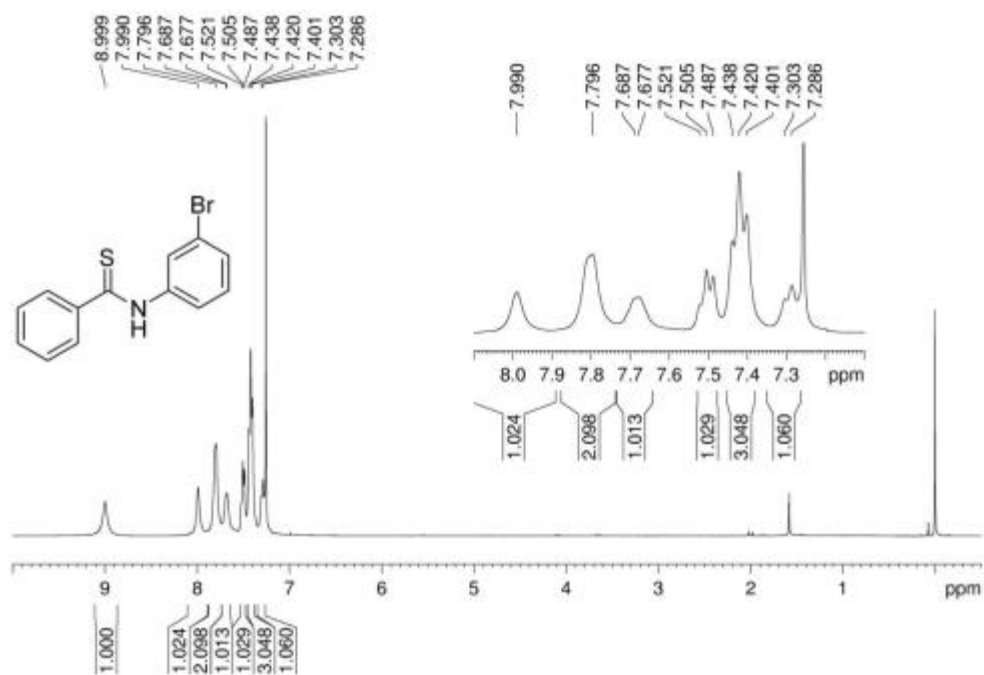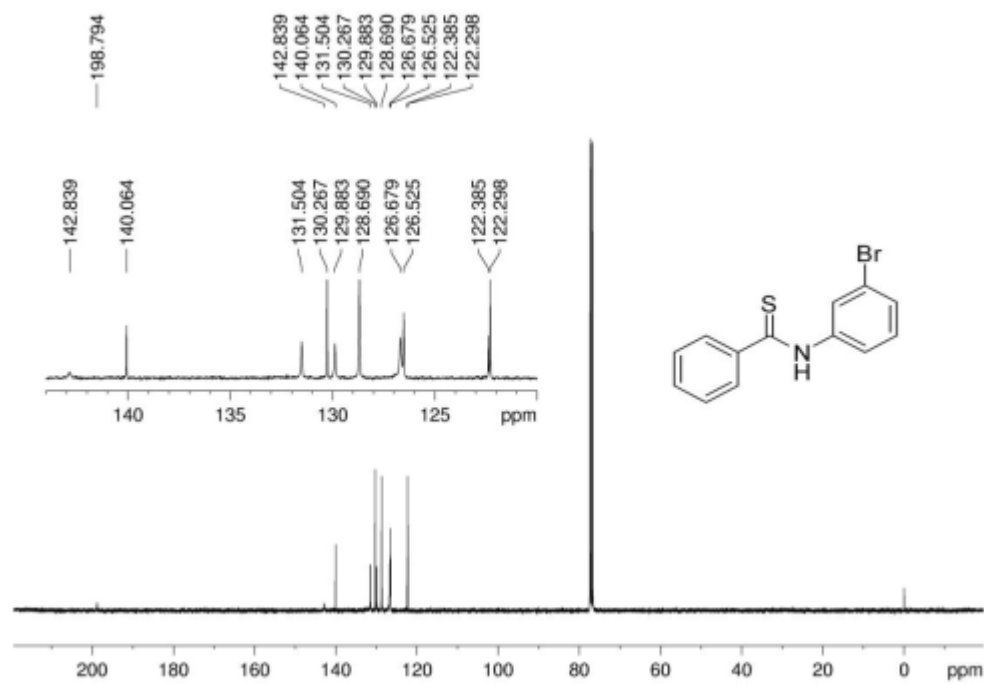

**Compound 3al**

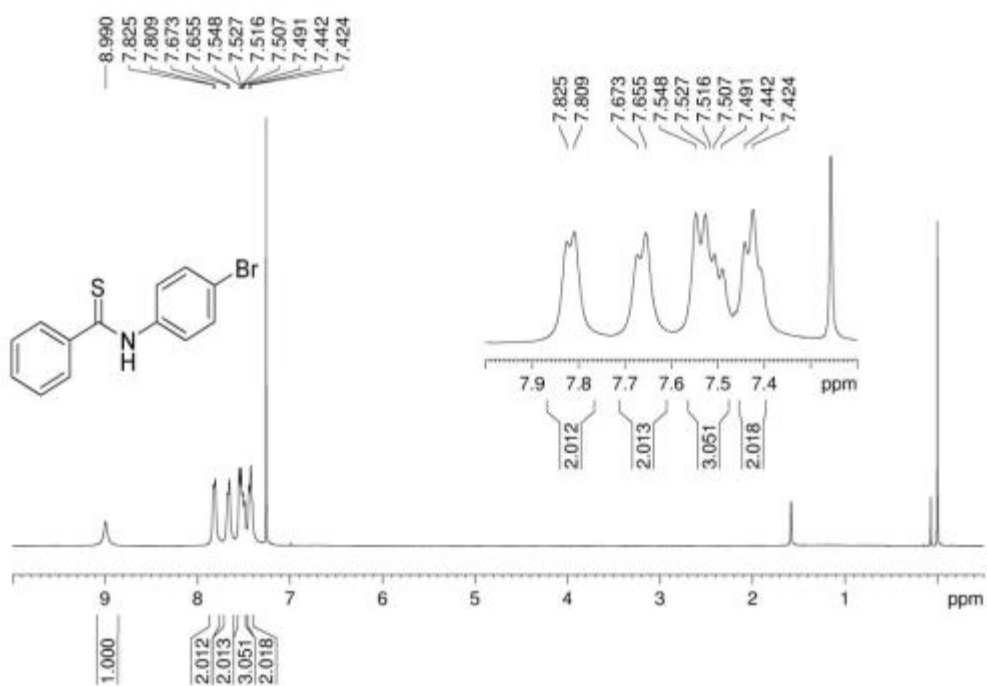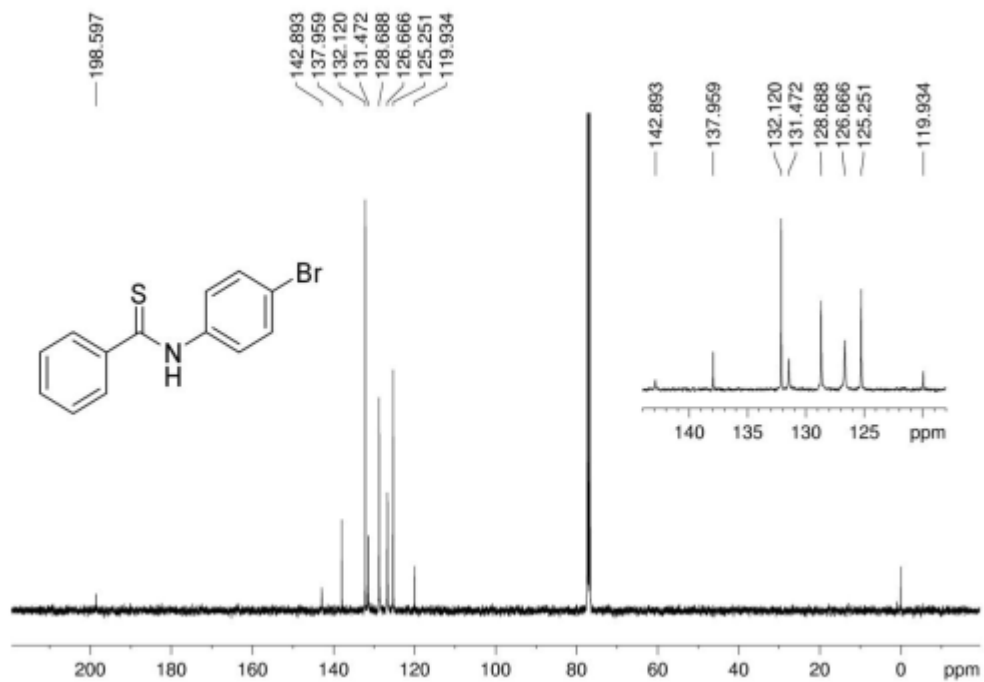

Compound 3am

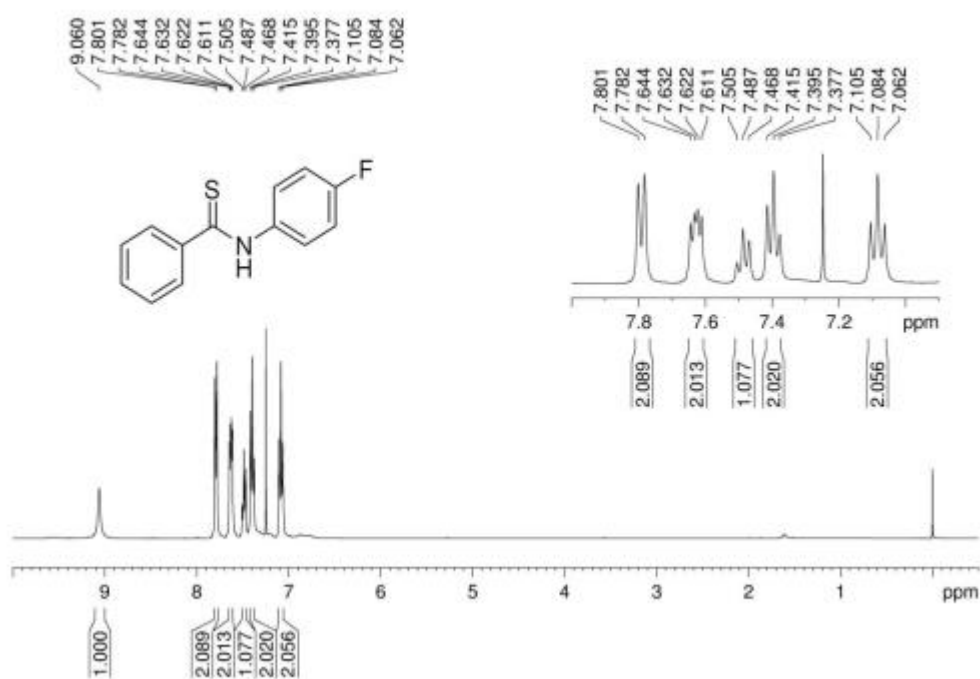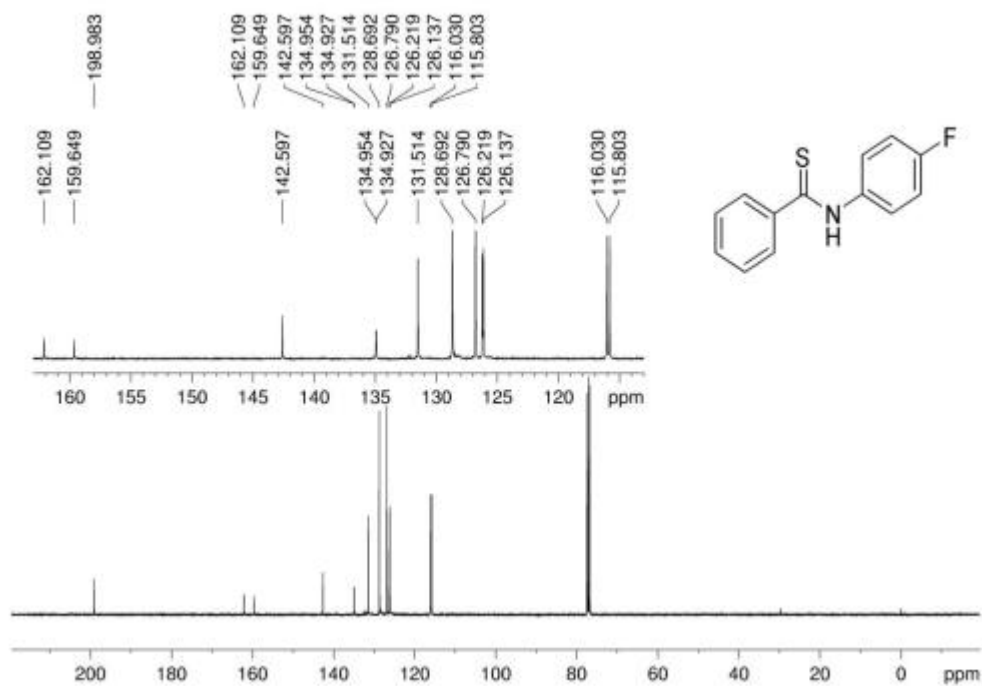

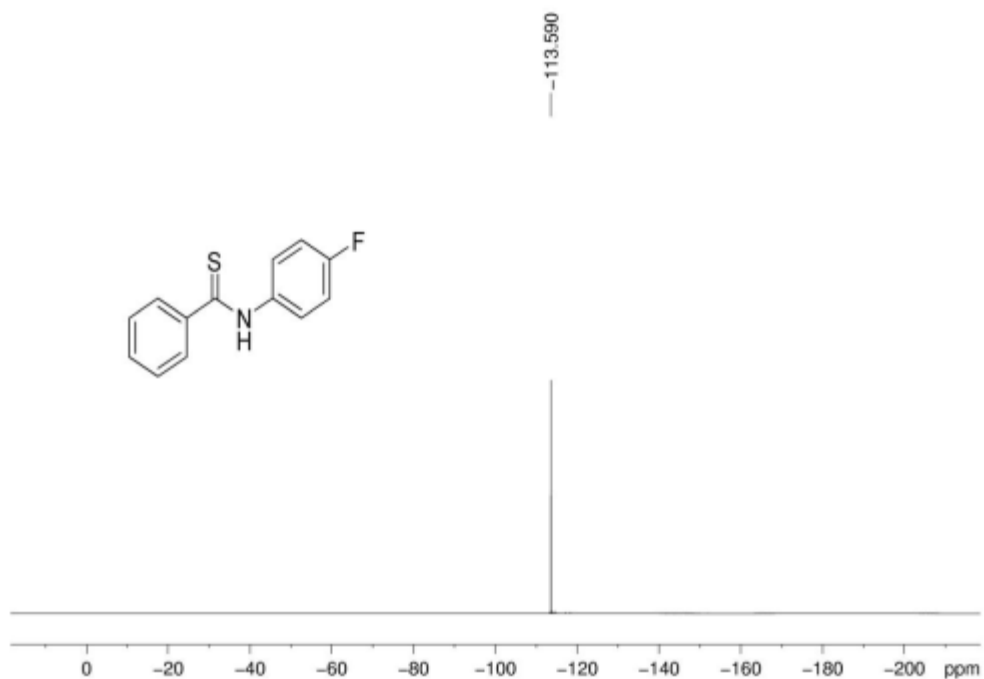

**Compound 3an**

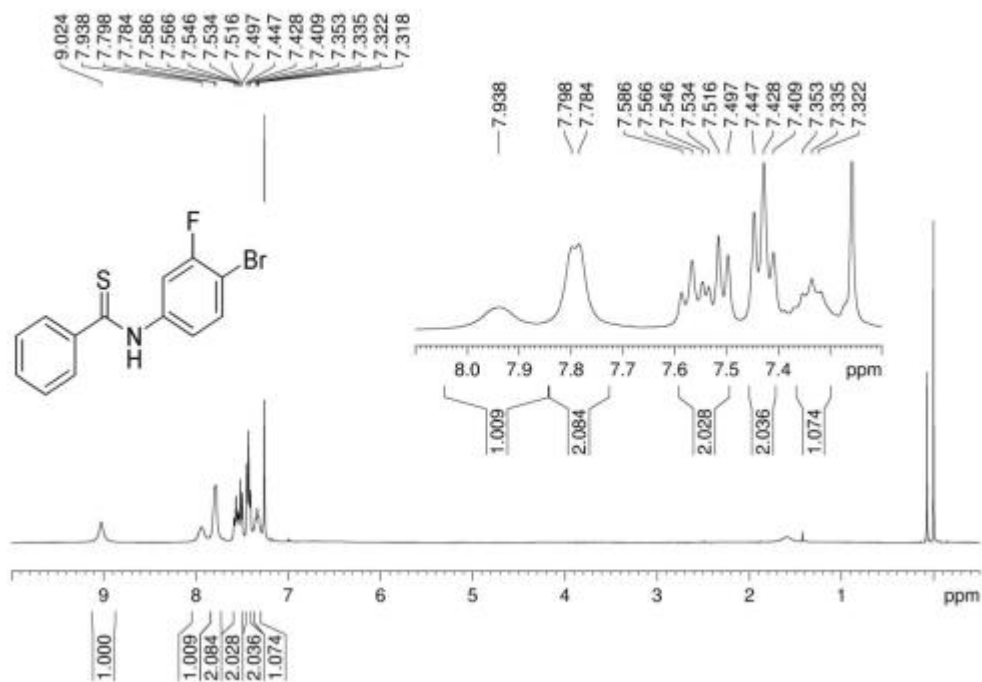

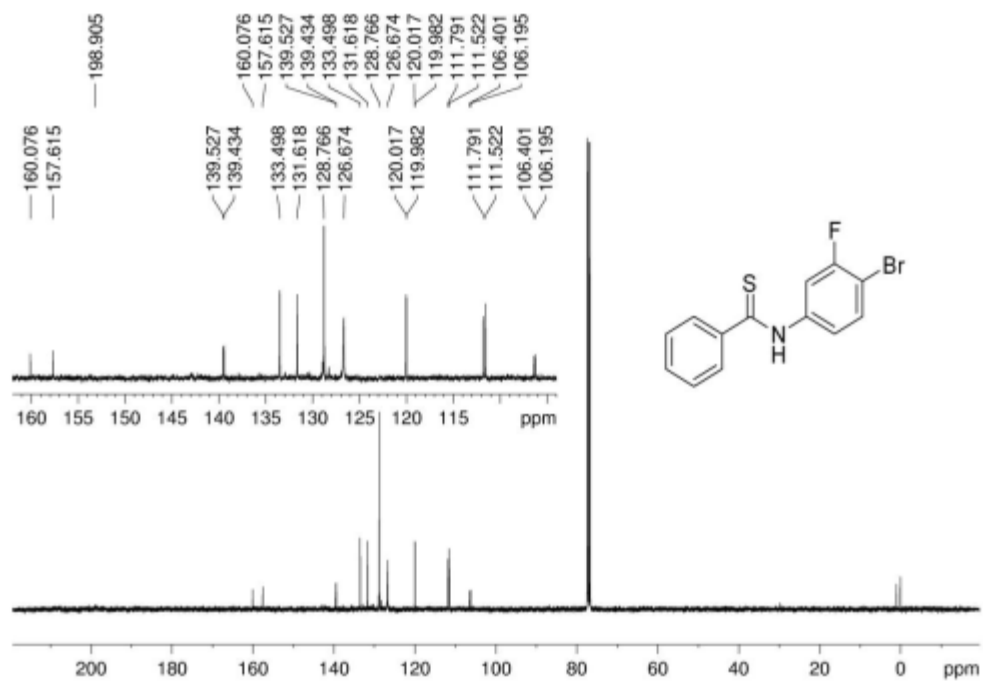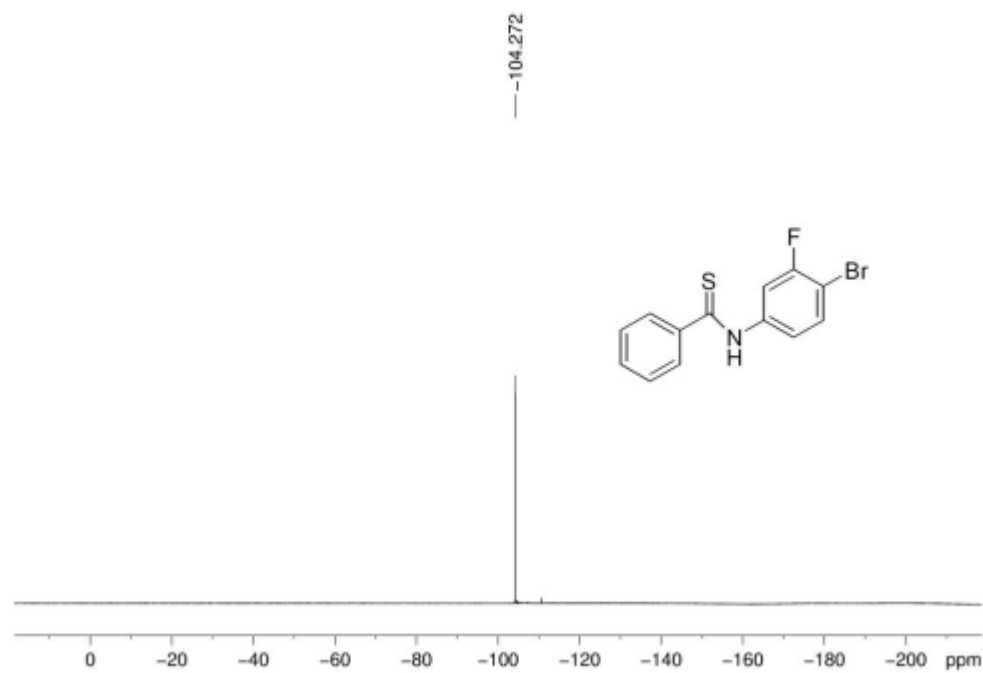

**Compound 3ao**

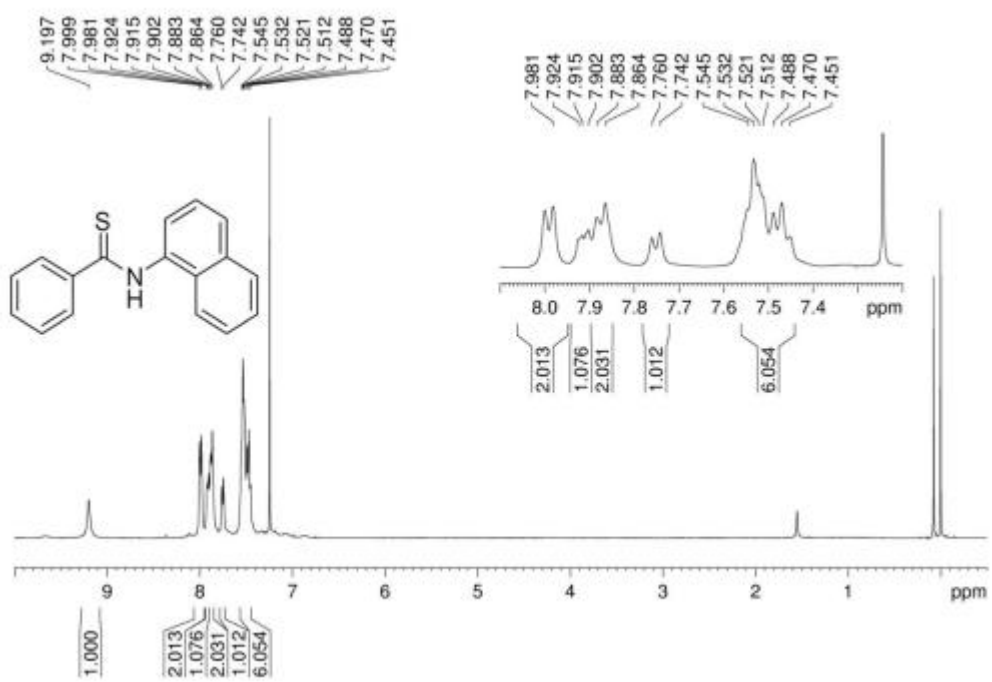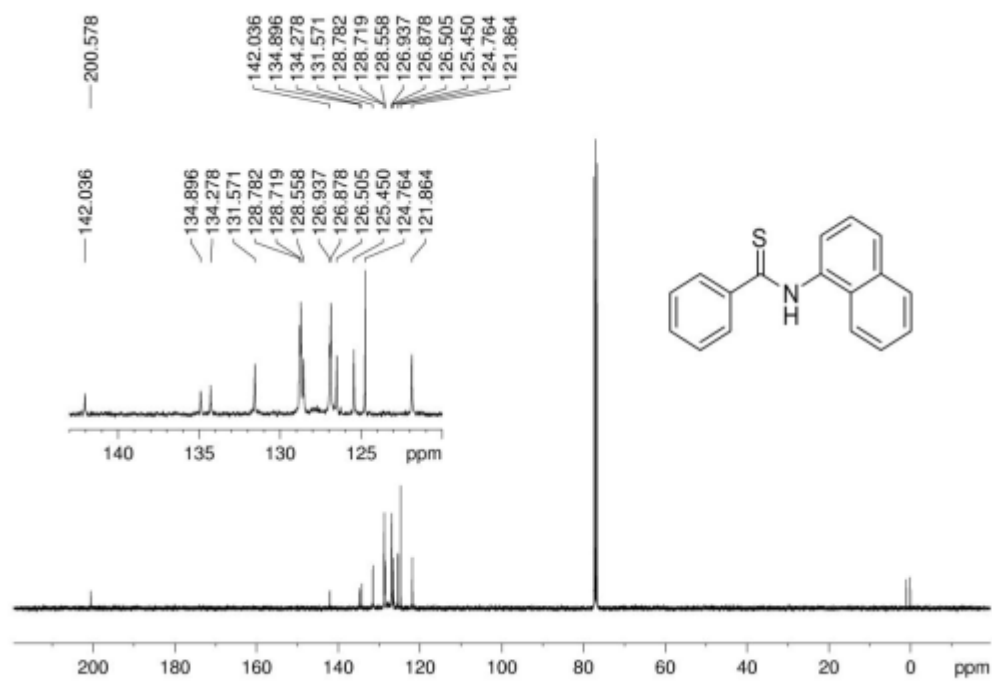

Compound 3ap



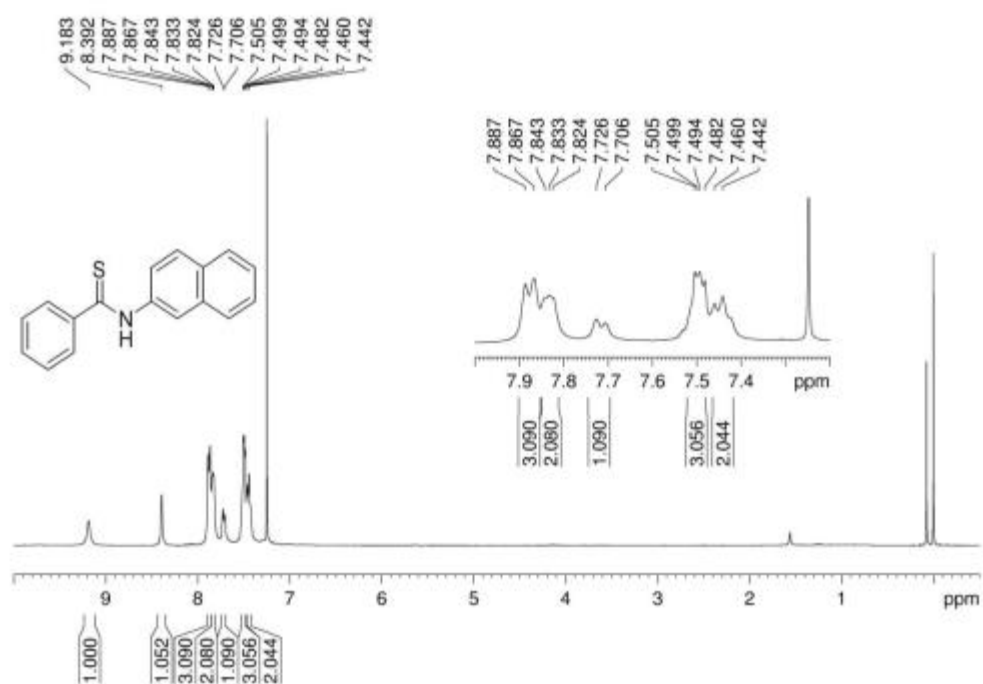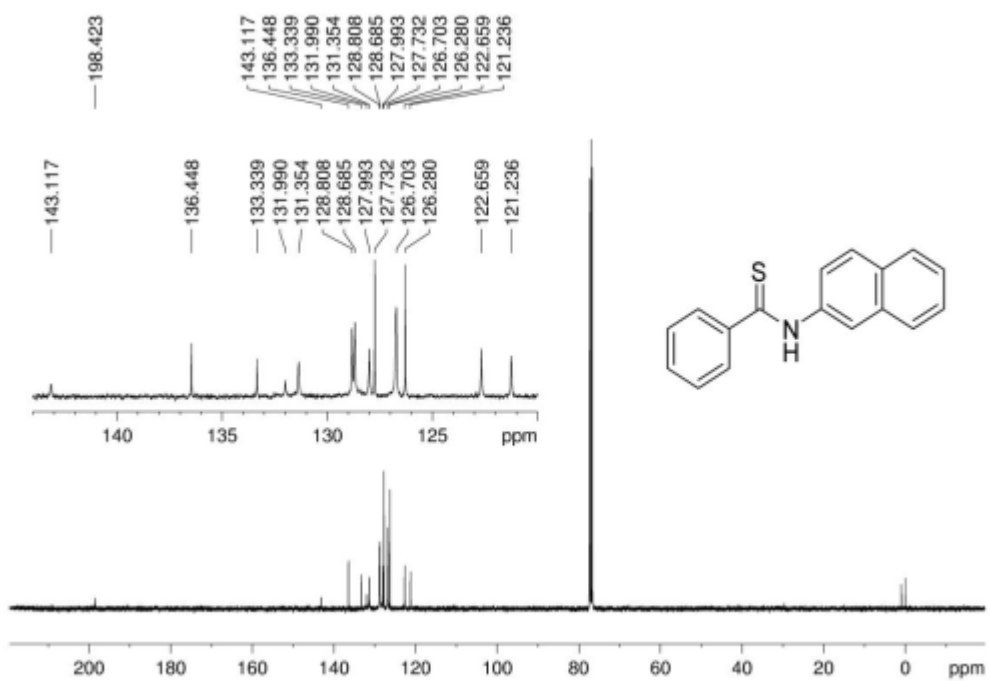

Compound 3ba

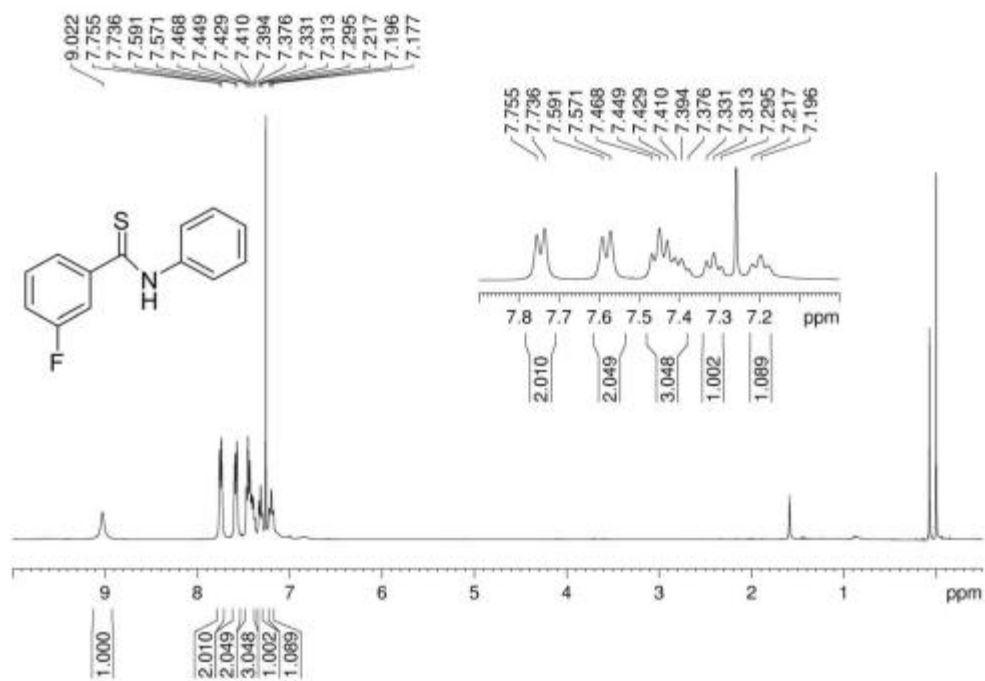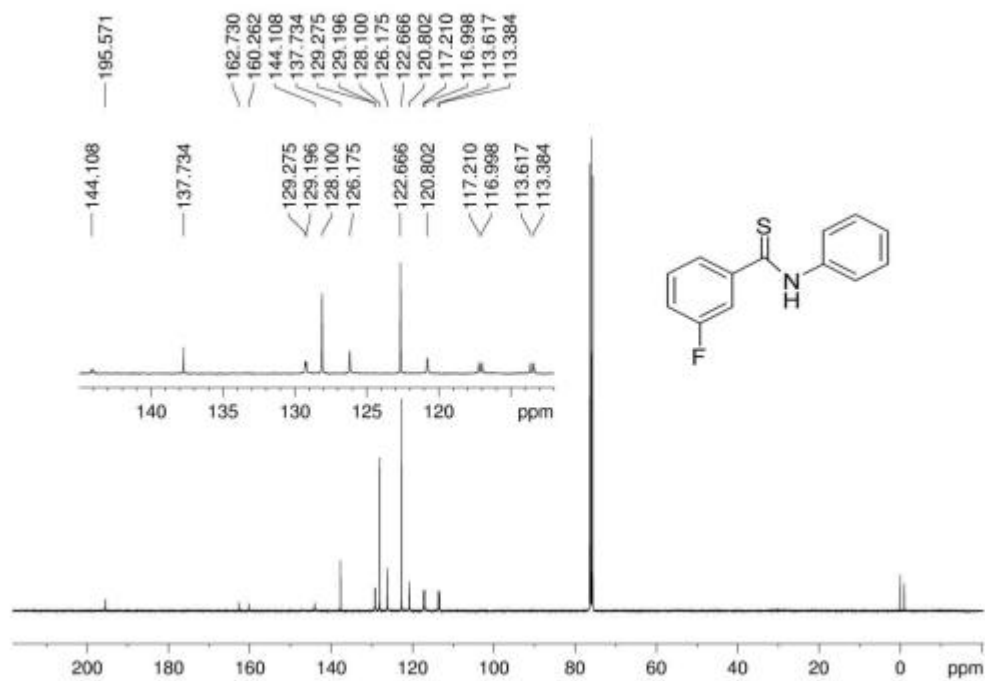

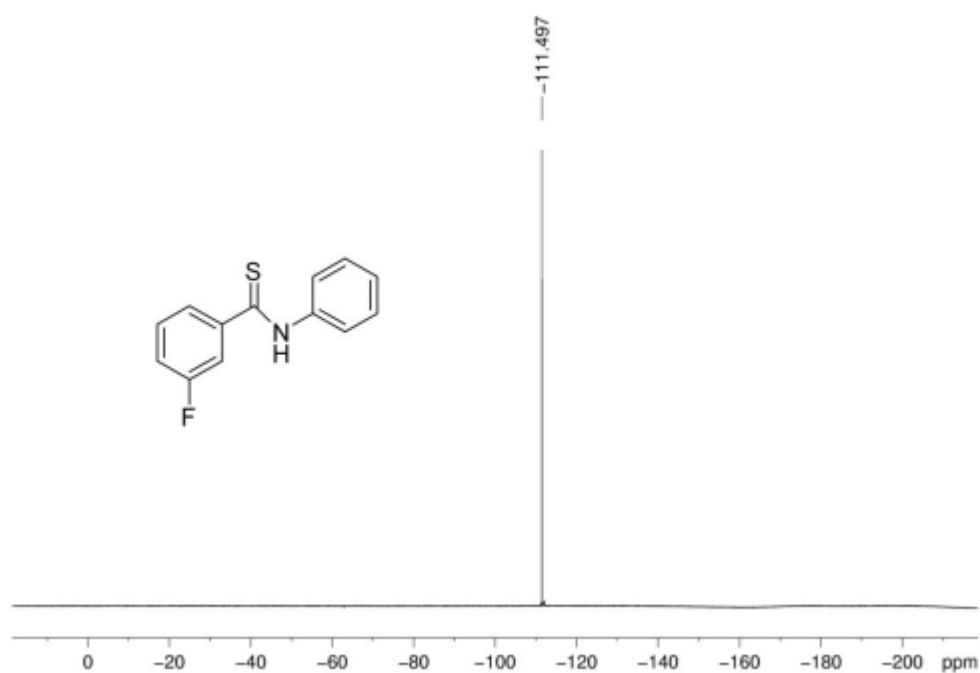

### Compound 3bd

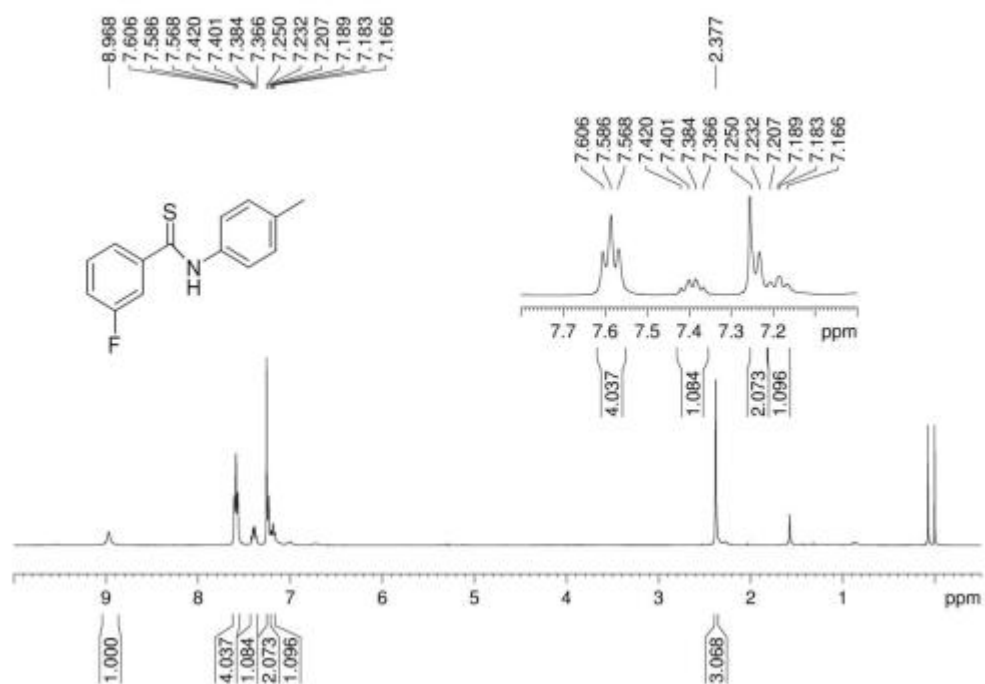

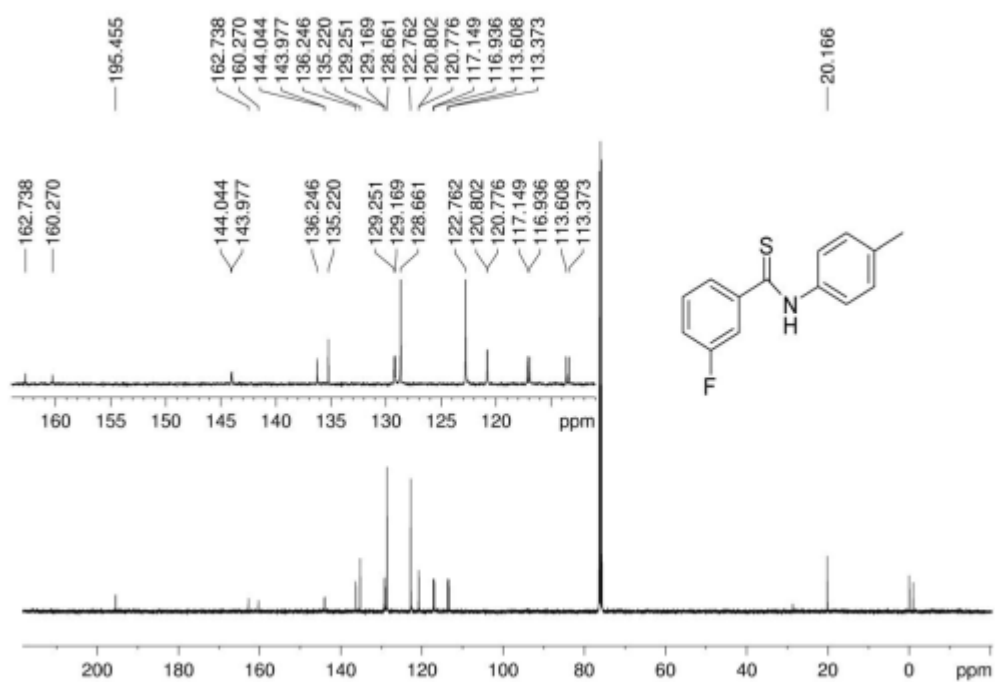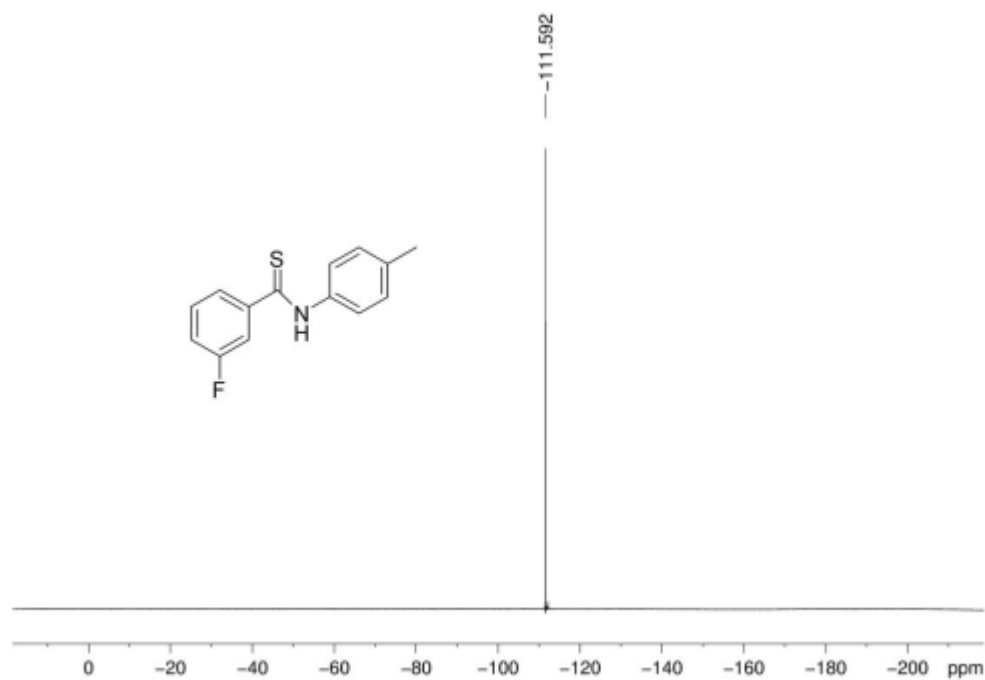

Compound 3bm

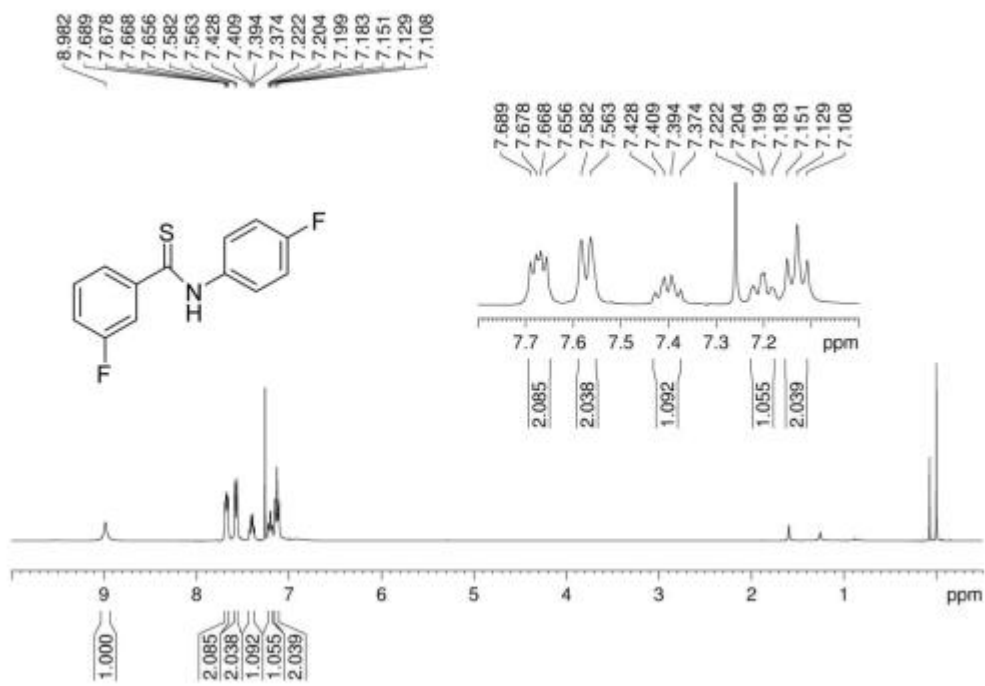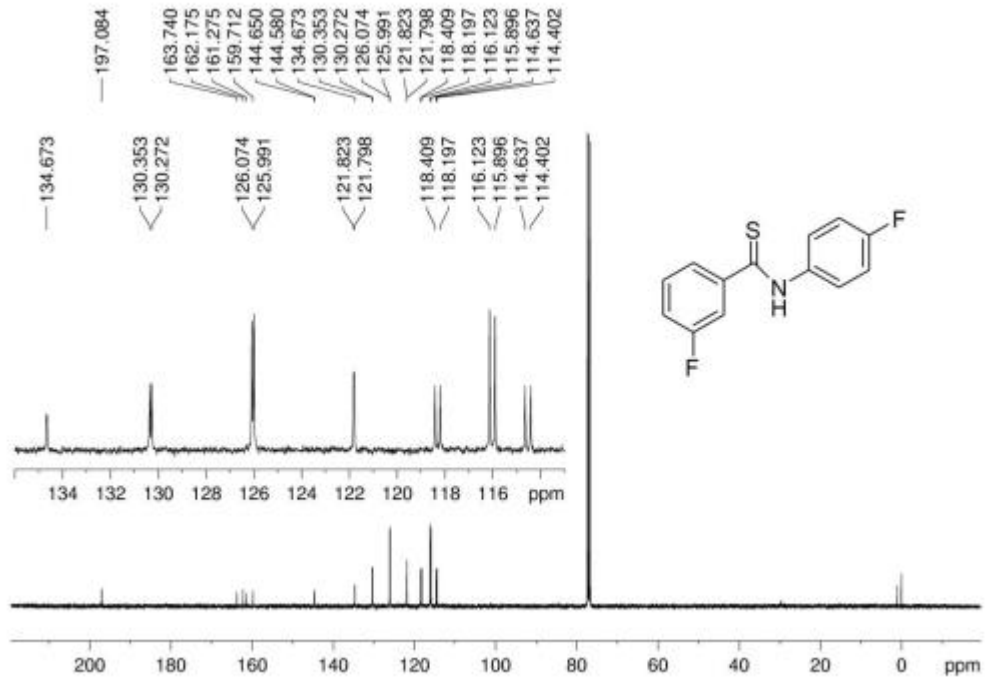

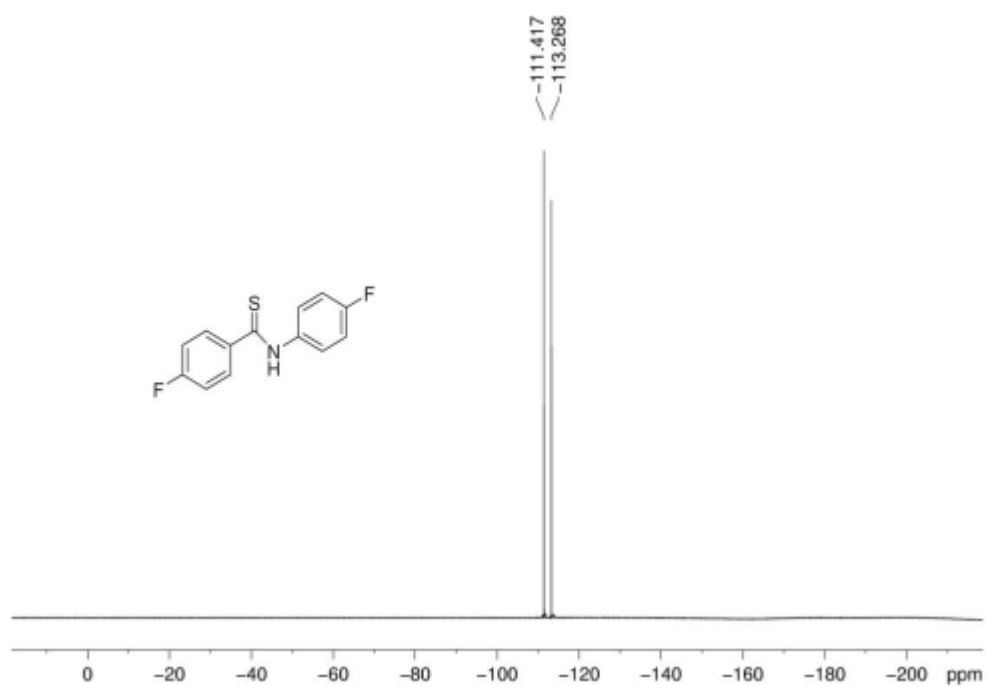

**Compound 3ca**

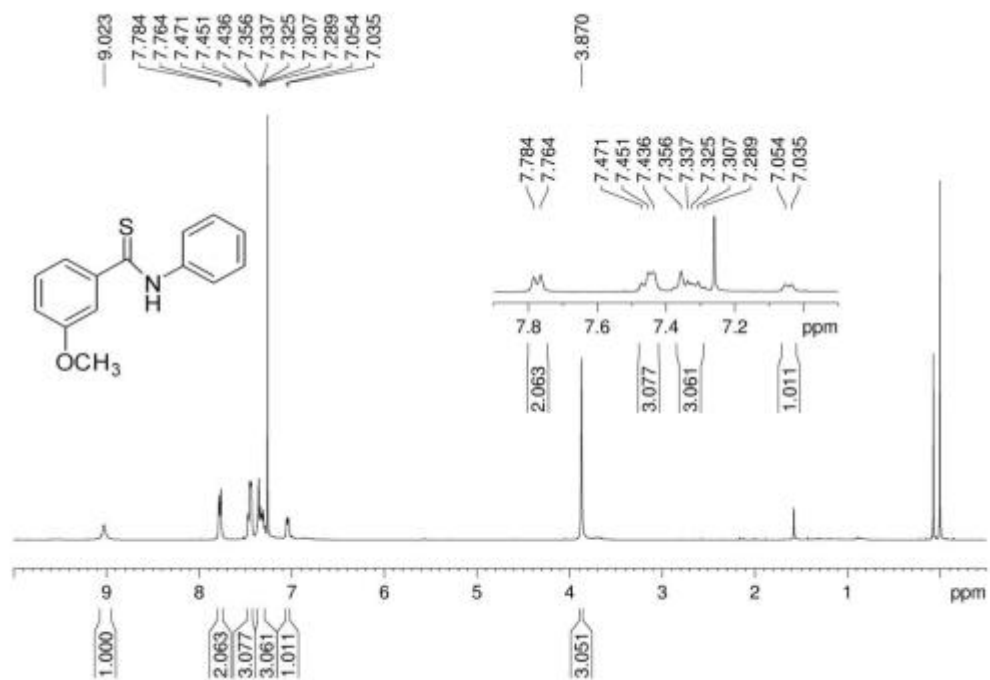

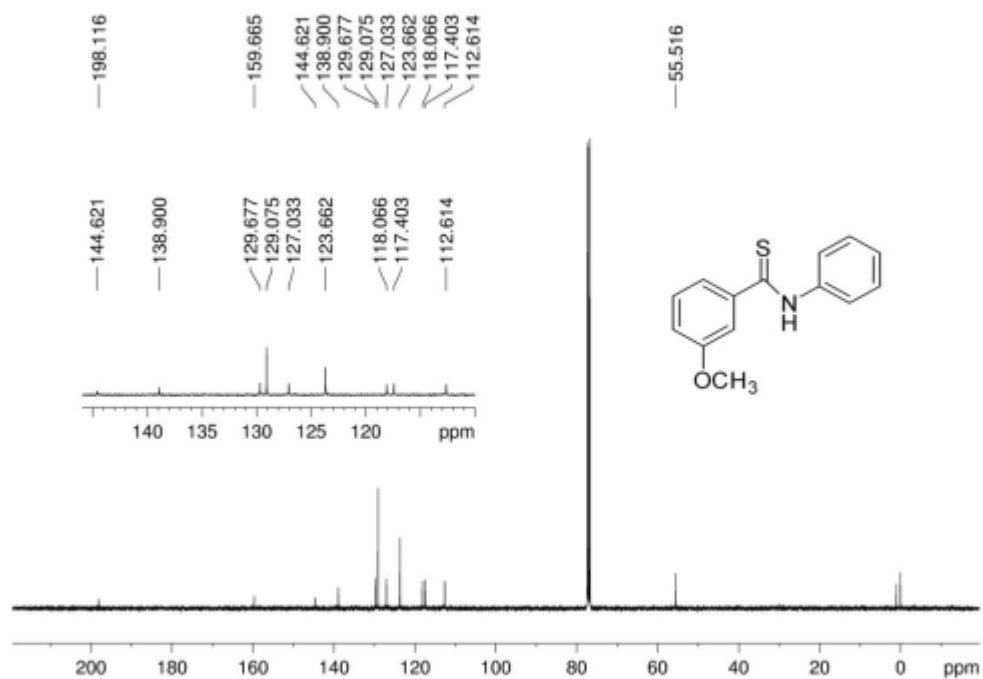

**Compound 3da**

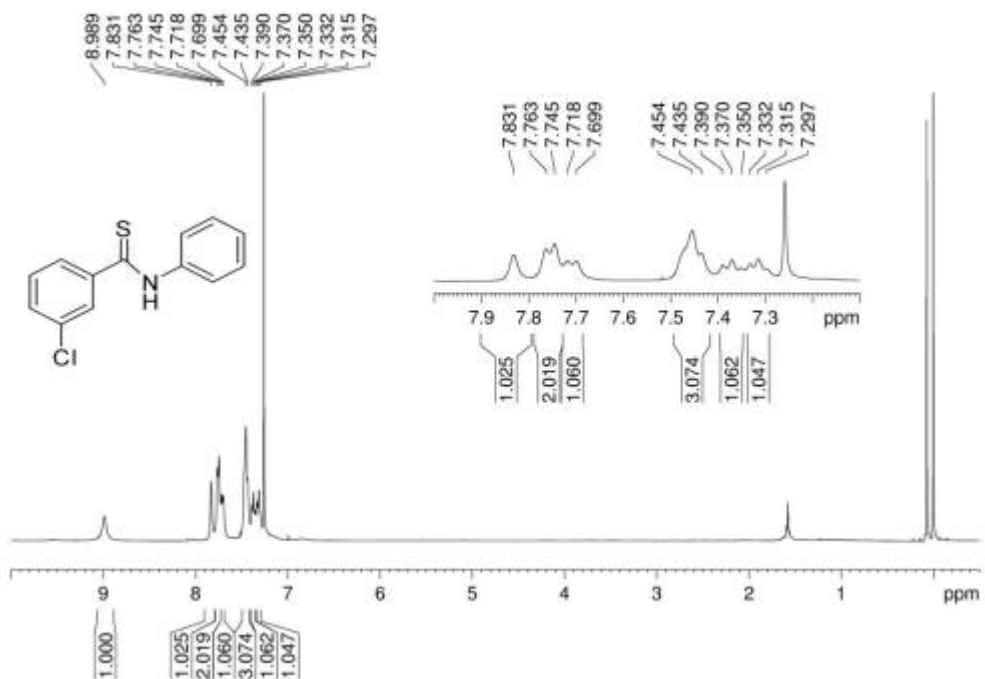

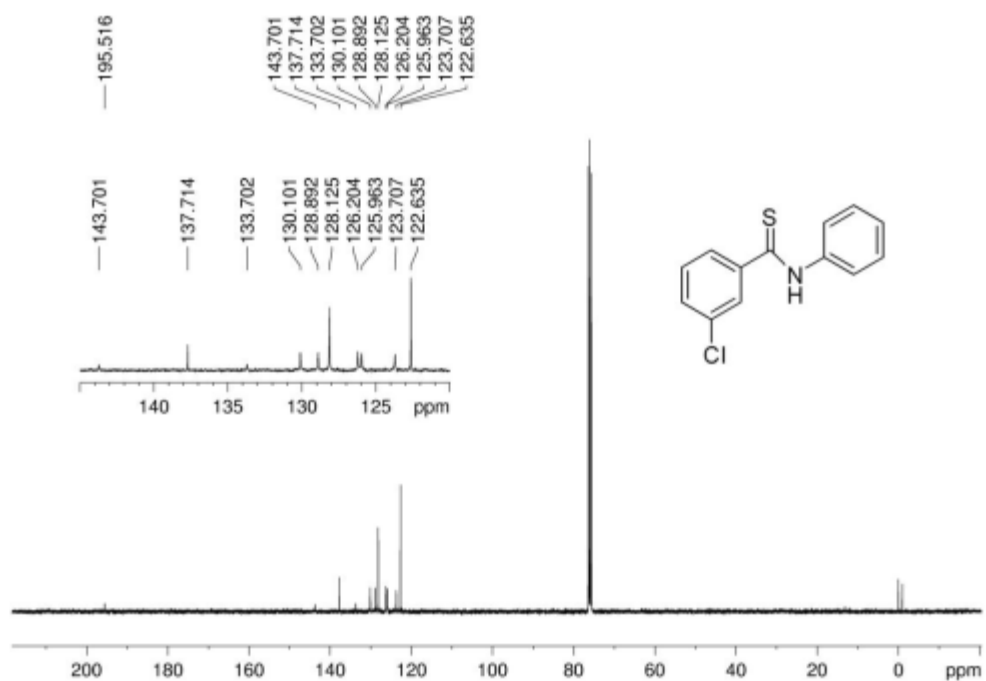

### Compound 3ea

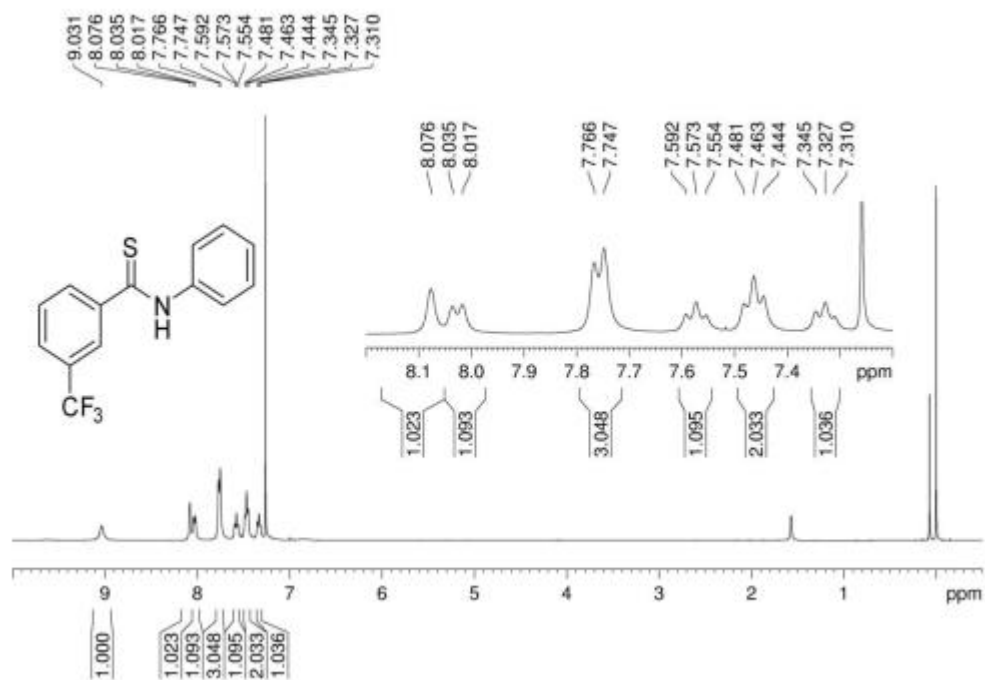



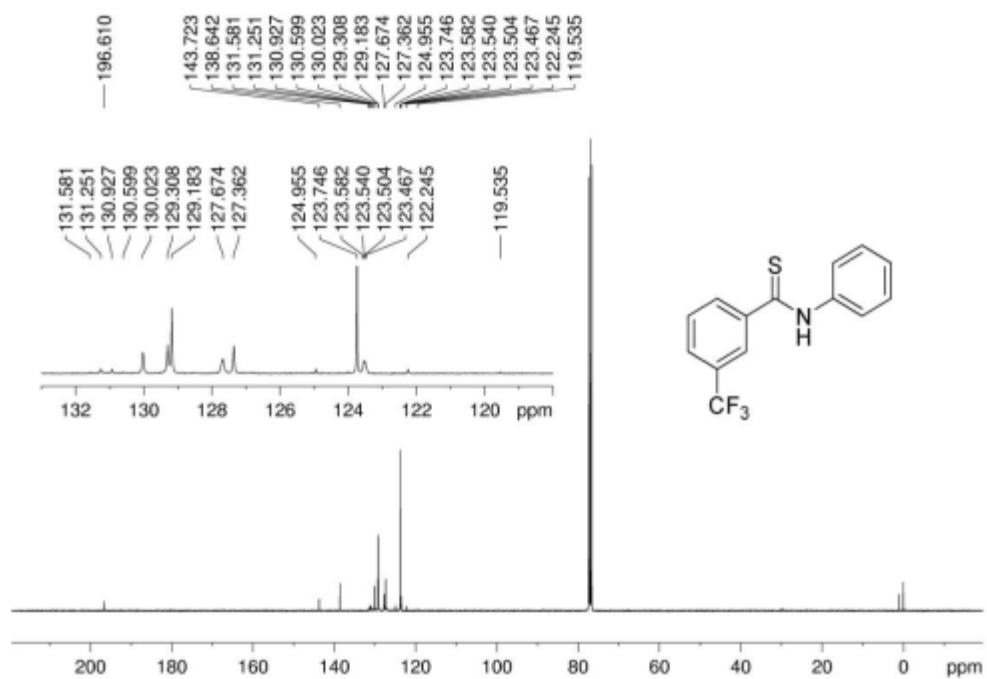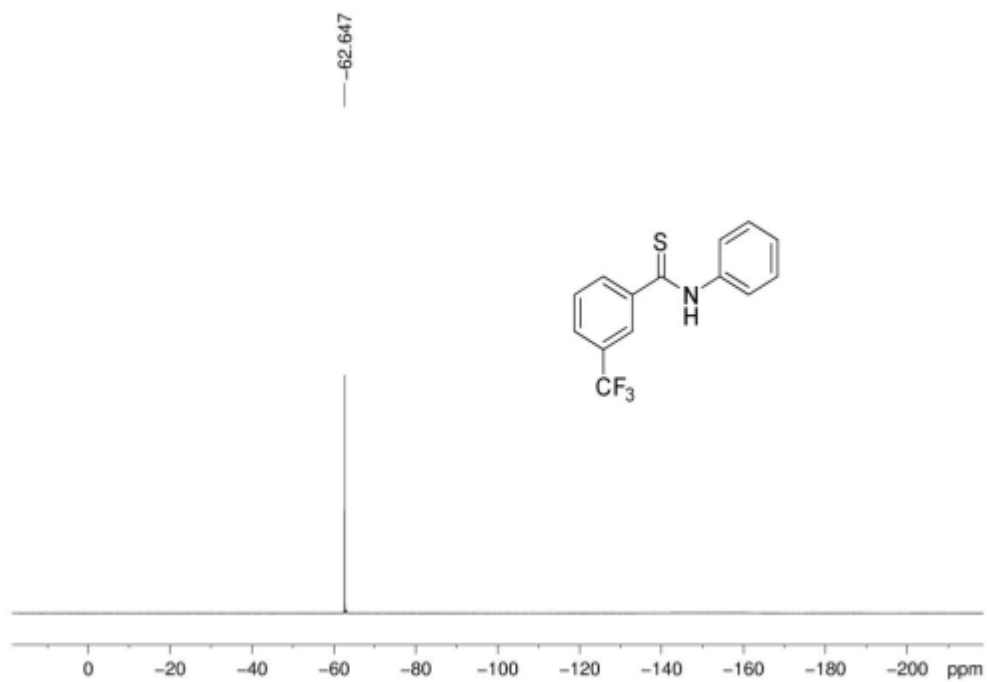

**Compound 3fa**

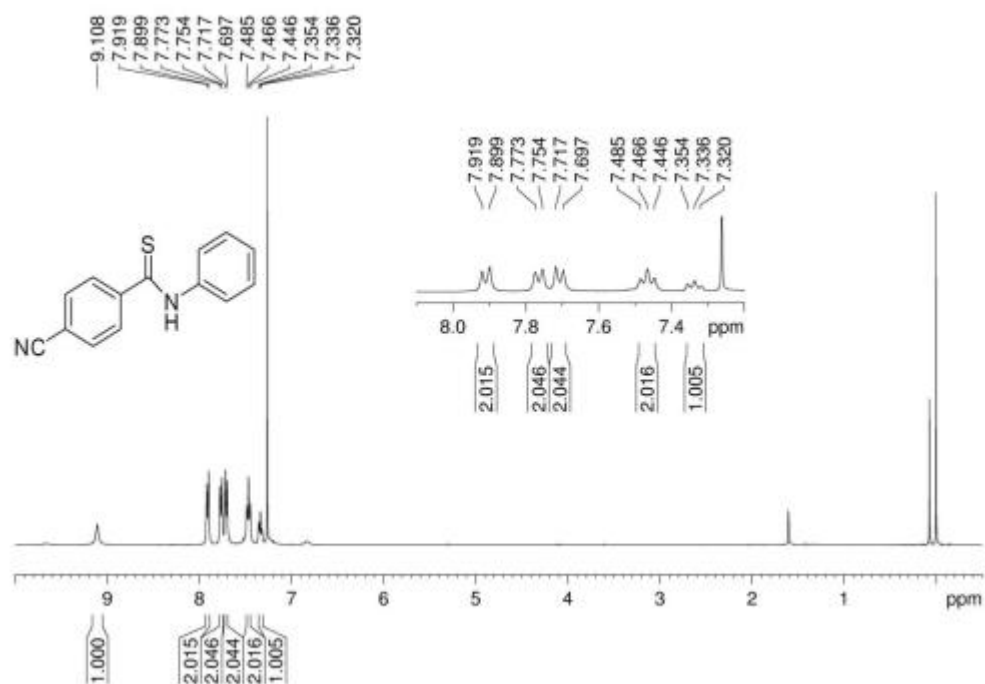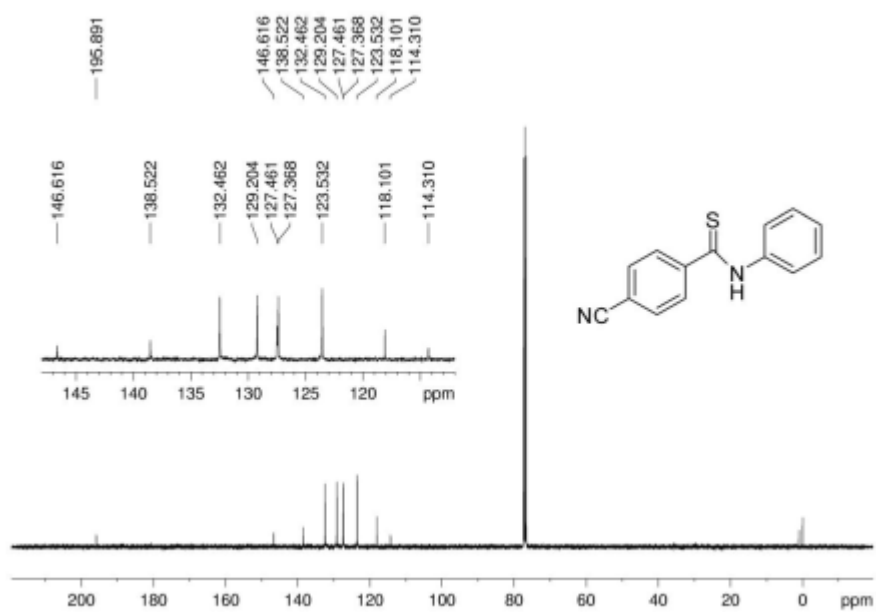

Compound 3ga

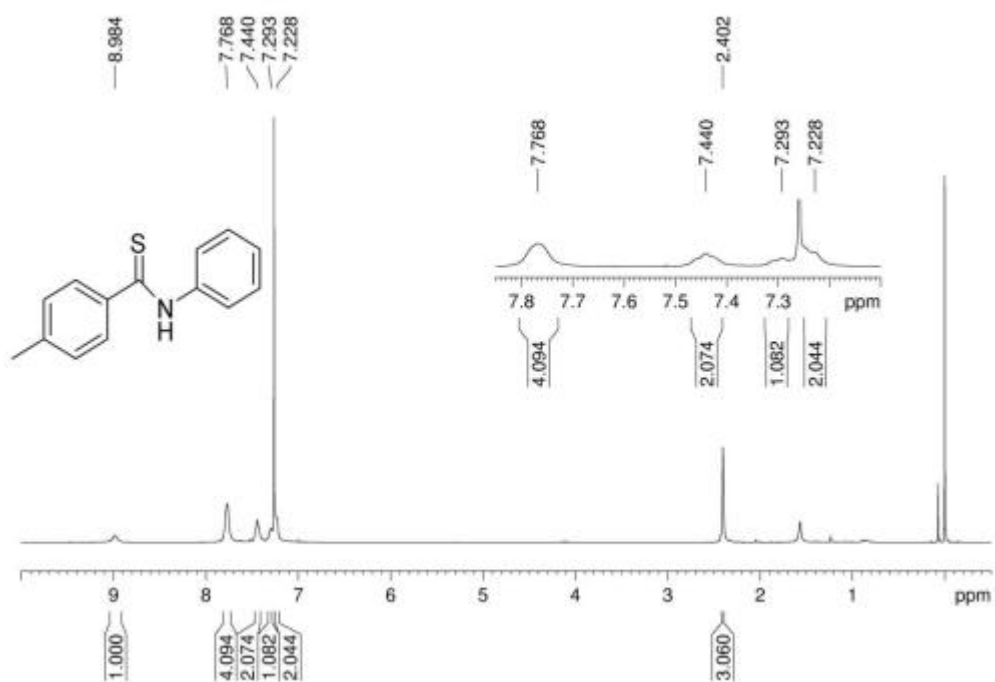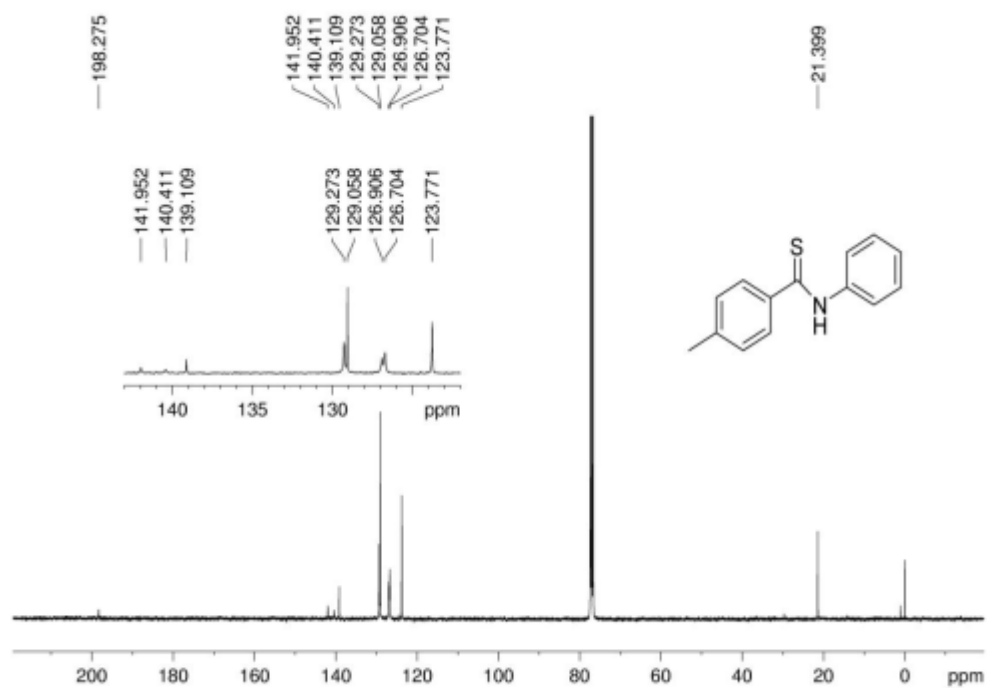

**Compound 3ha**

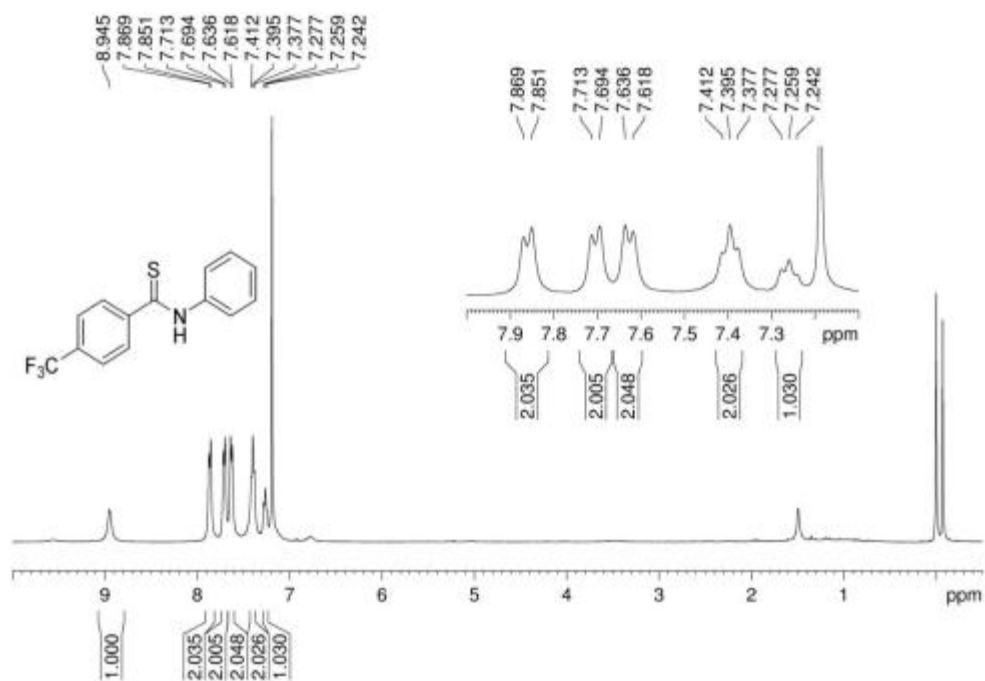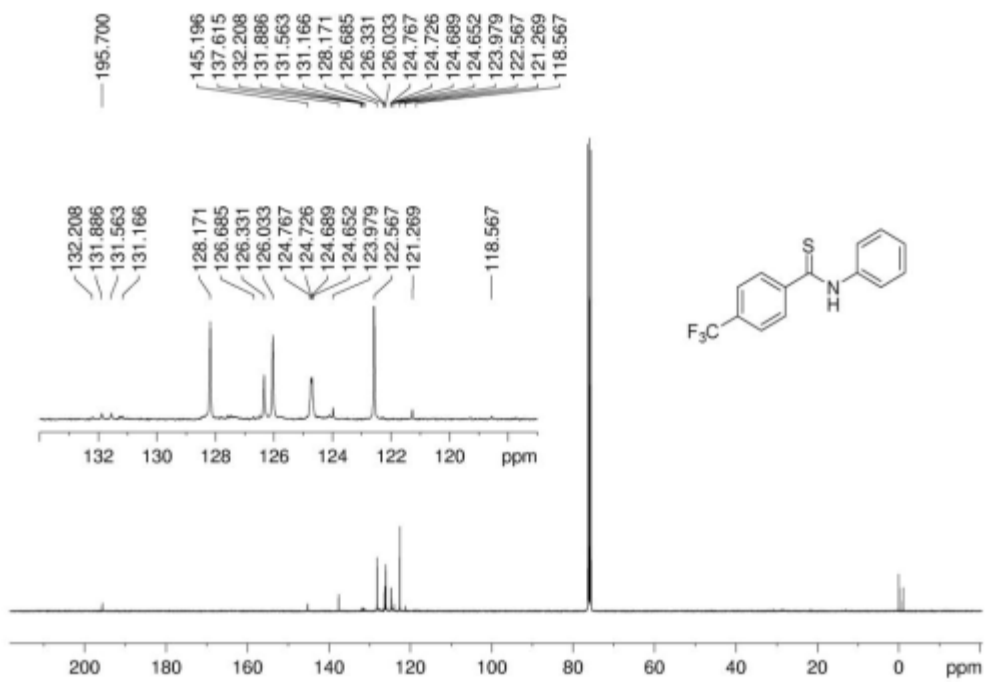

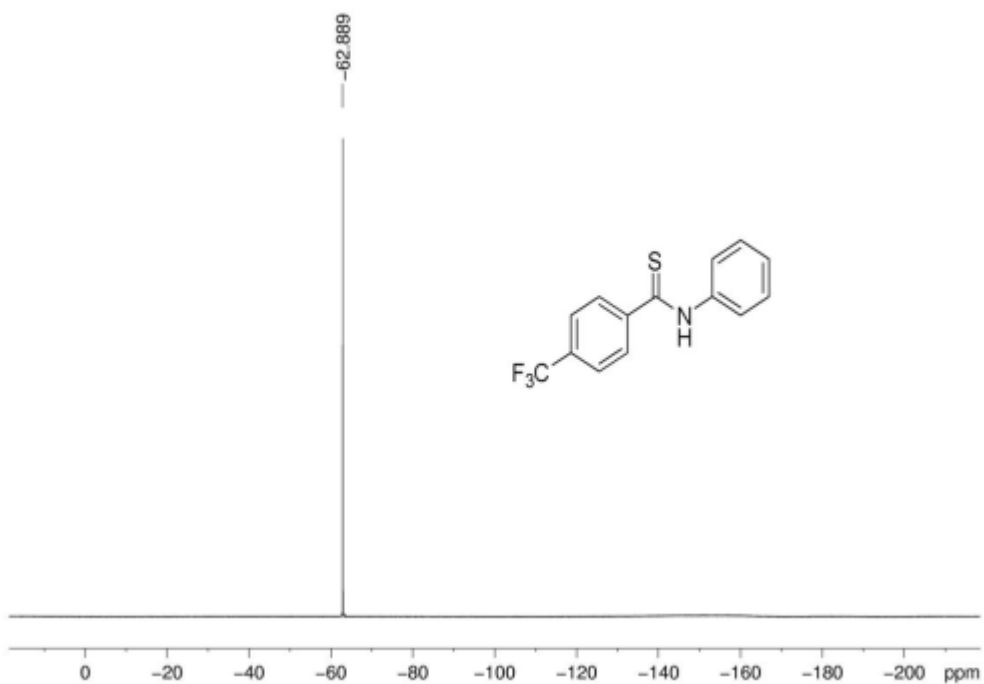

**Compound 3eb**

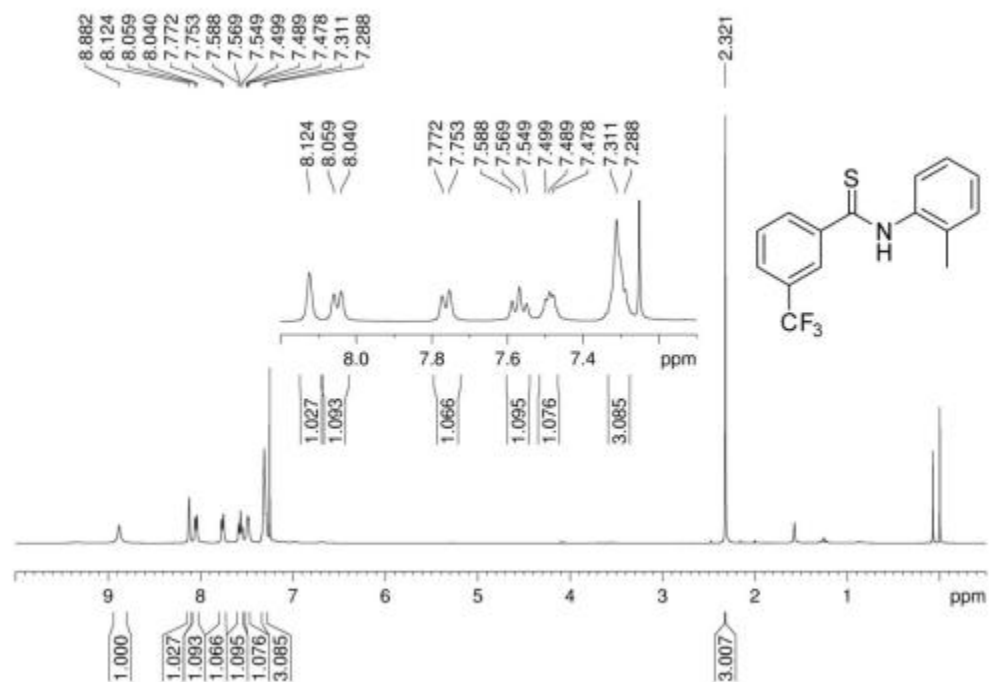

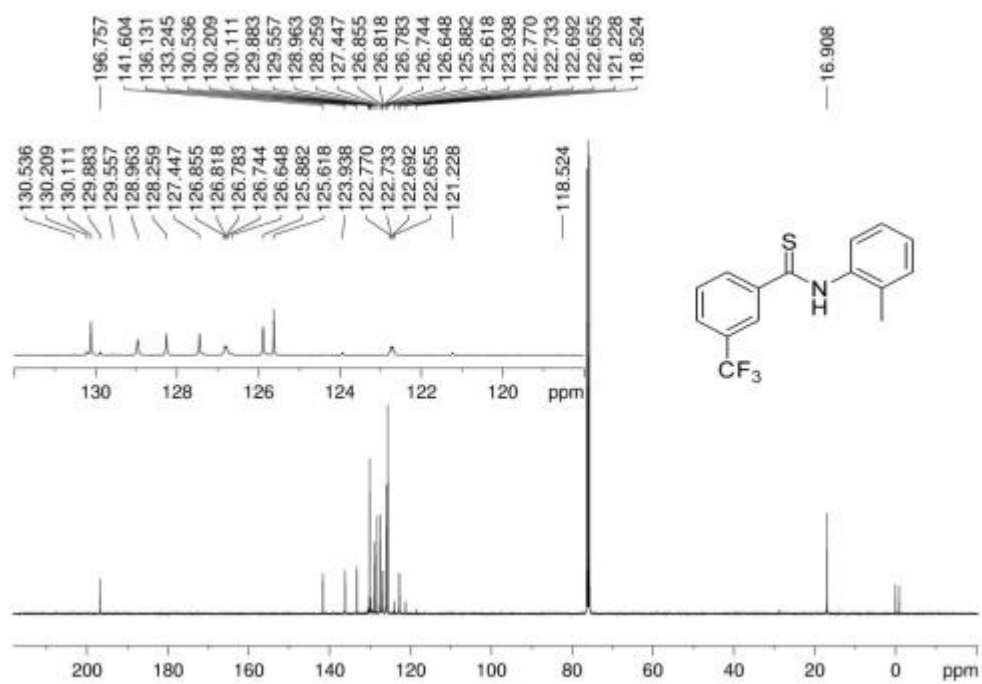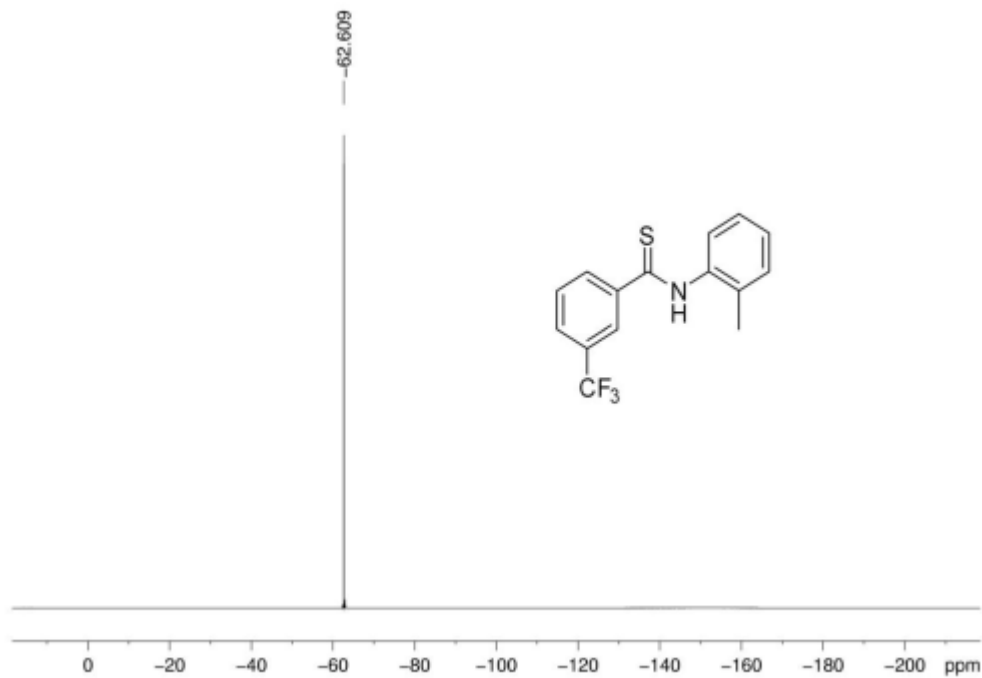

Compound 3ec

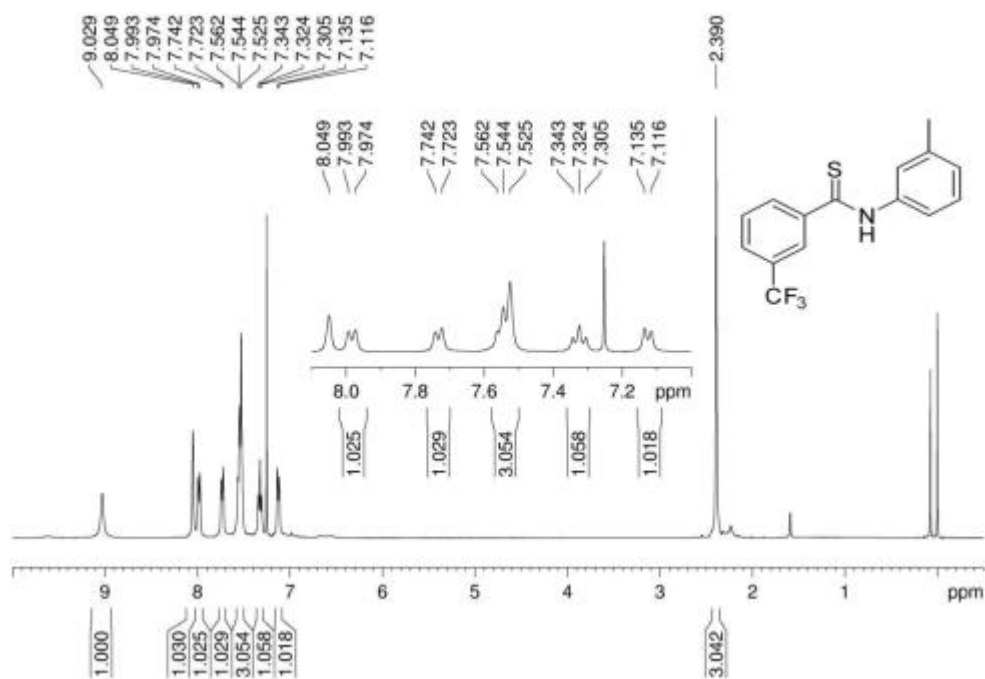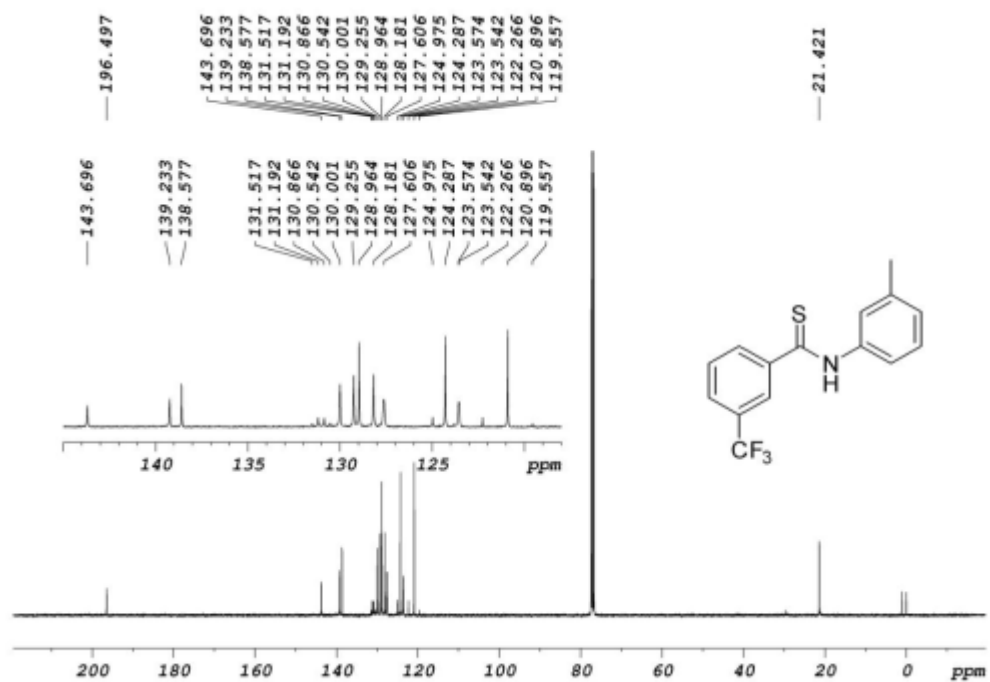

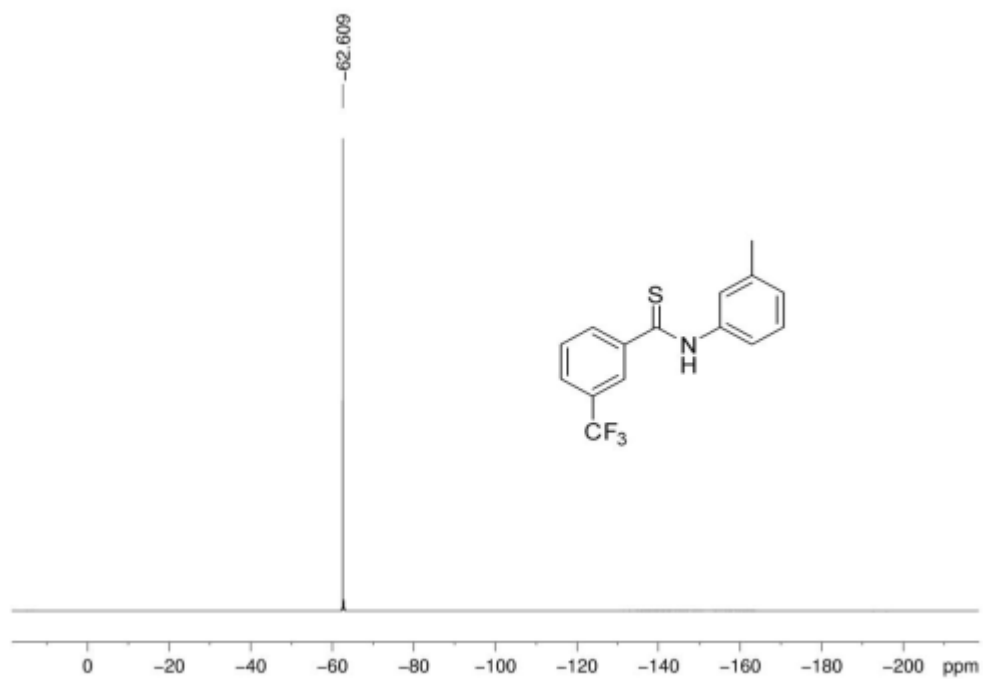

**Compound 3ed**

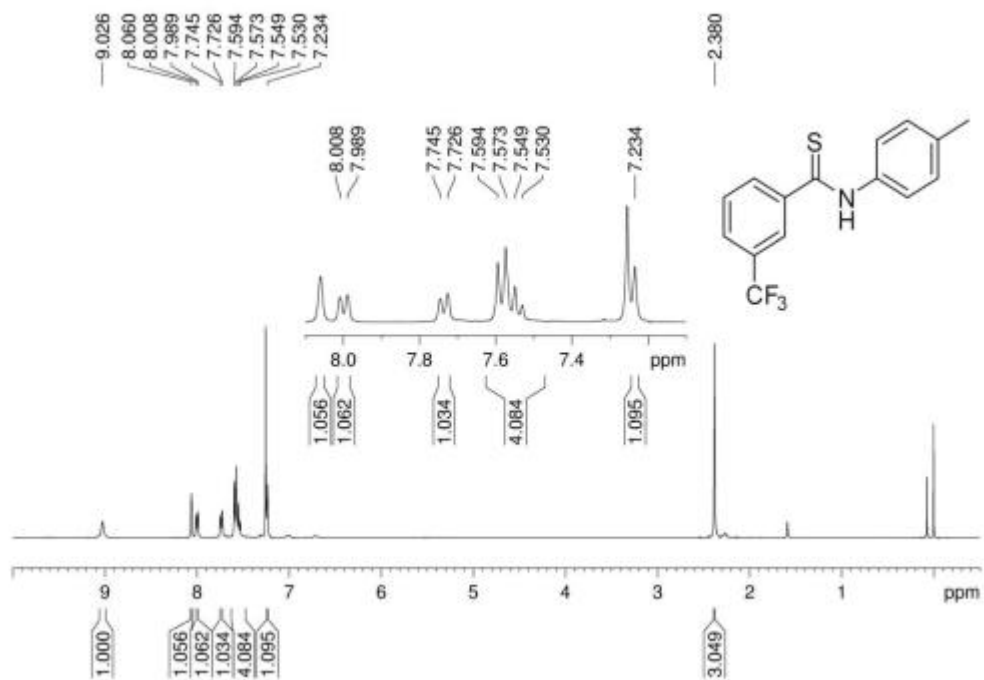



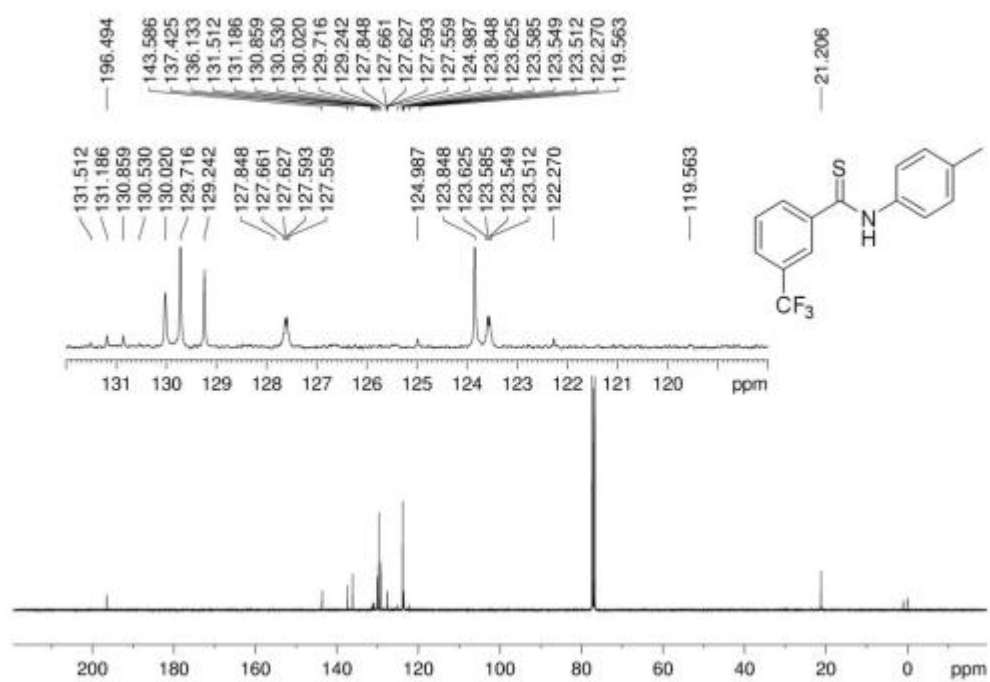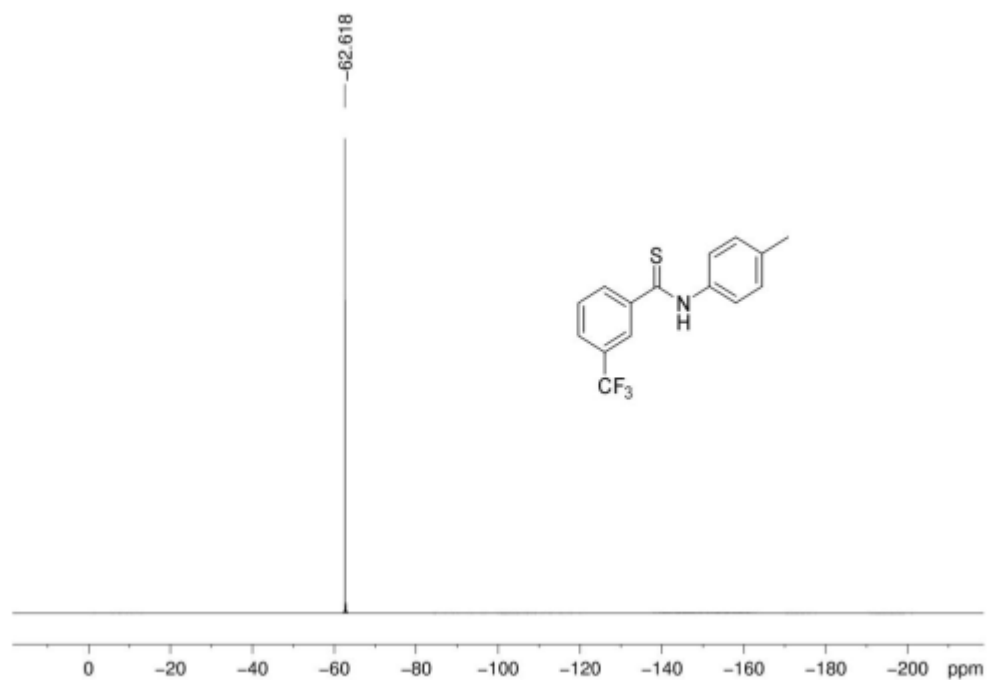

Compound 3ee

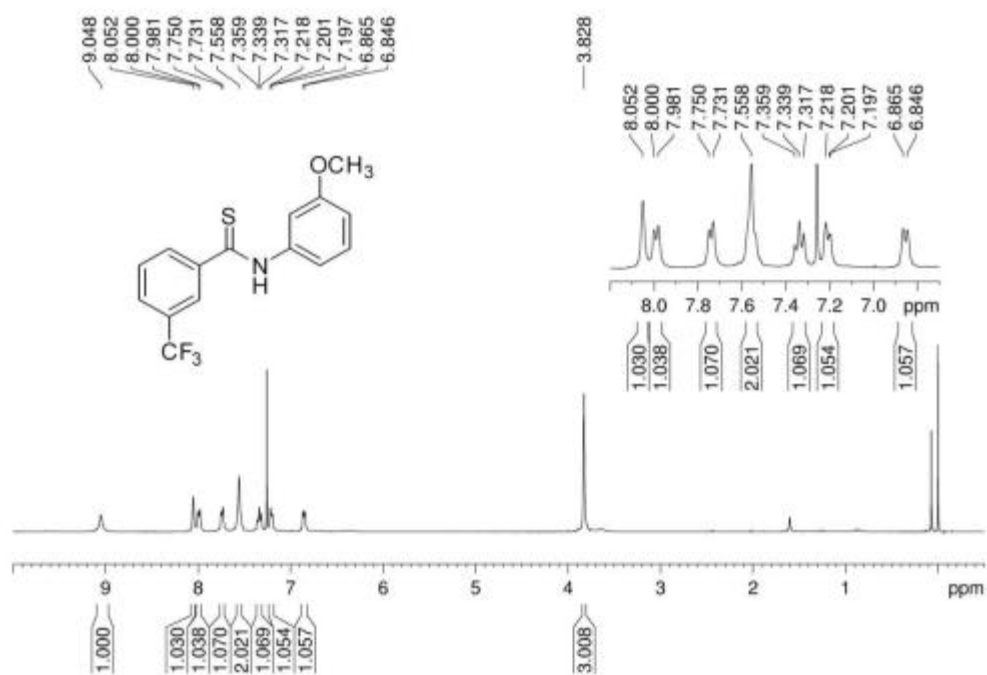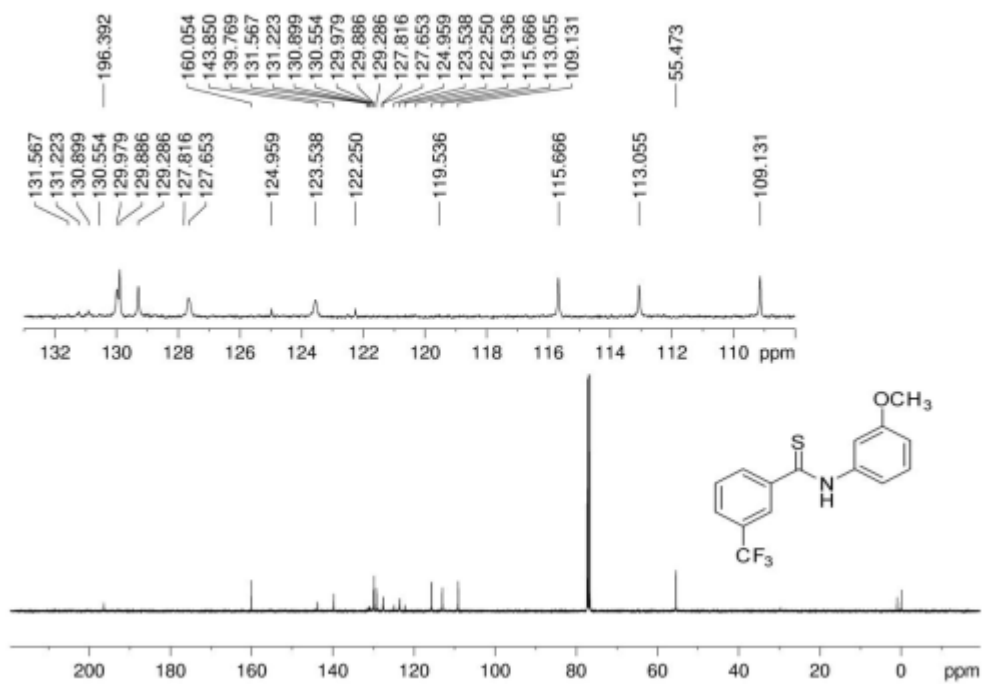

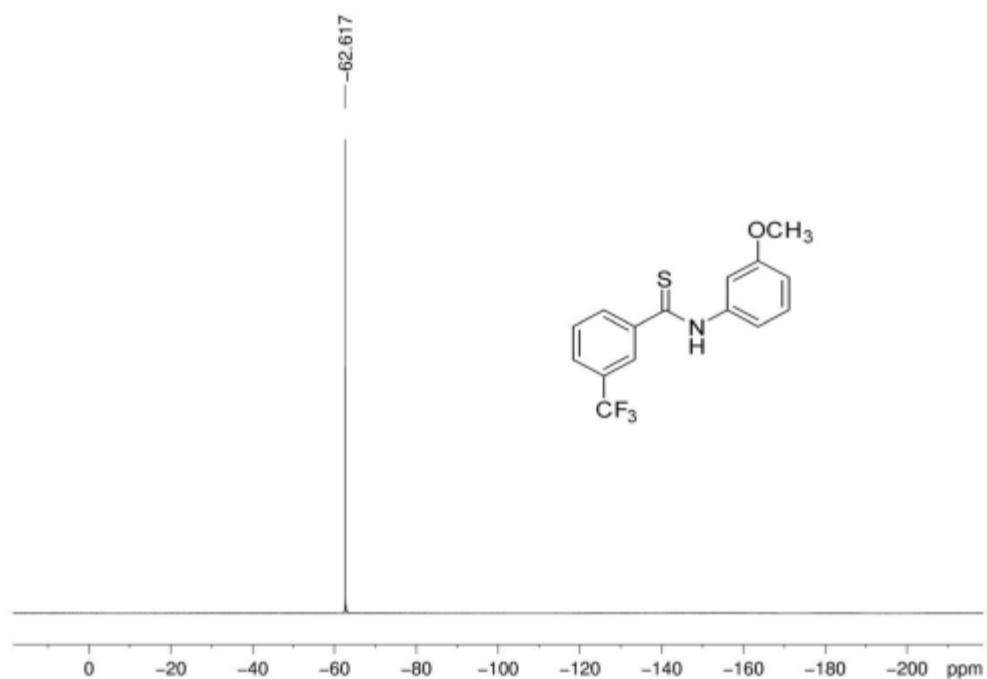

### Compound 3ef

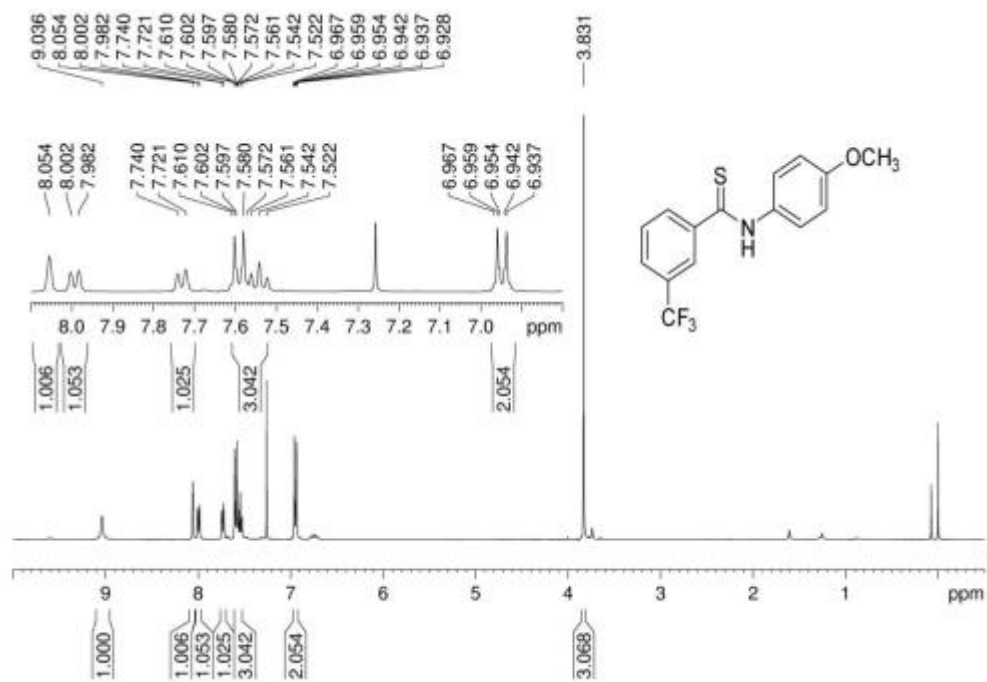

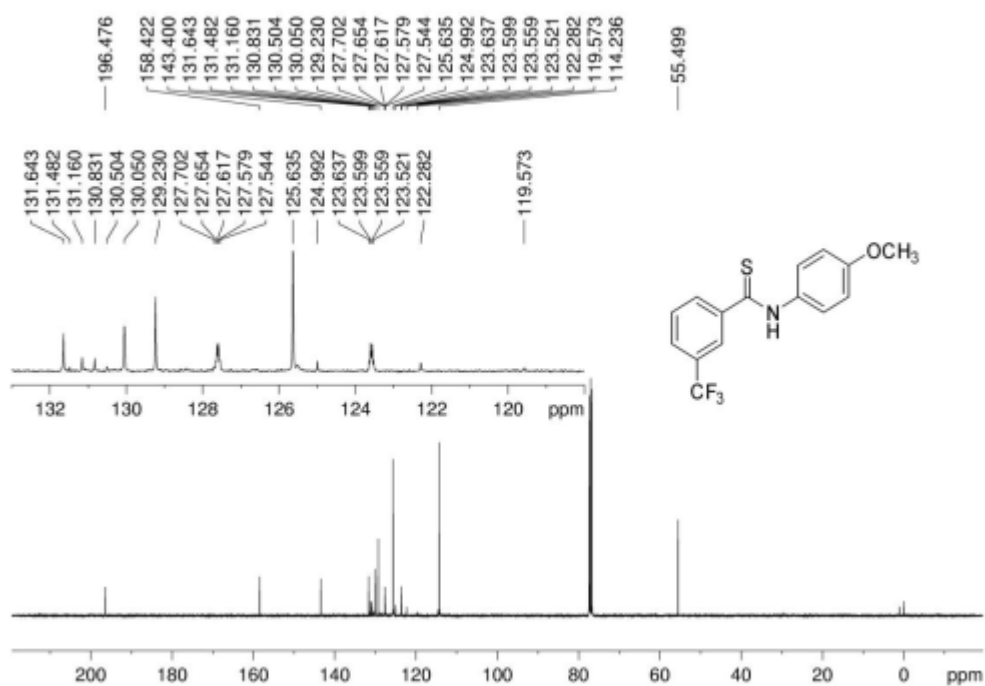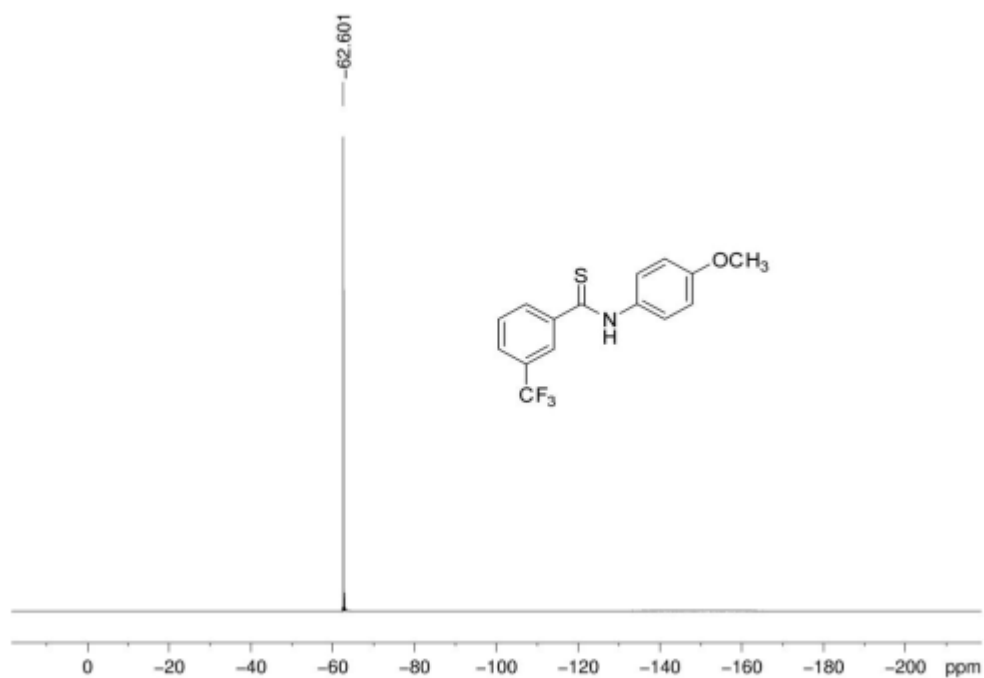

**Compound 3eg**

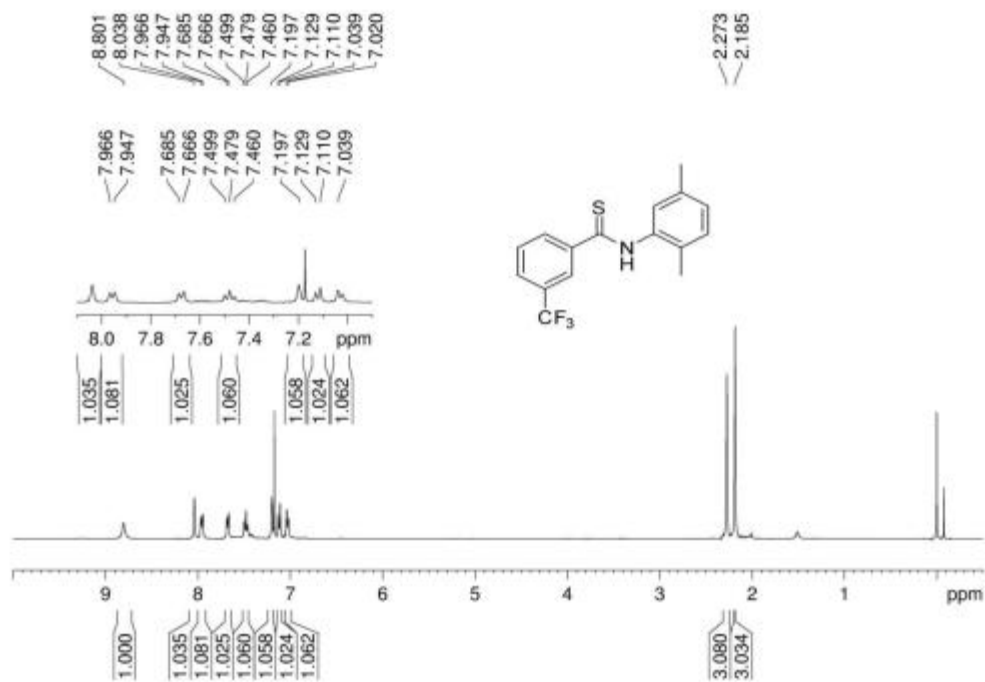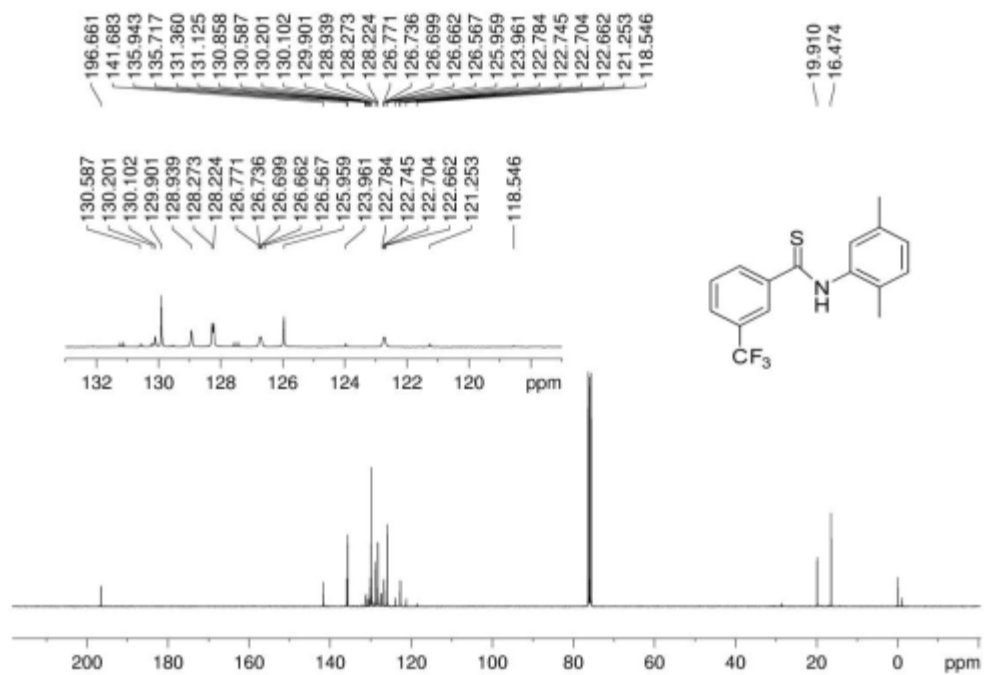

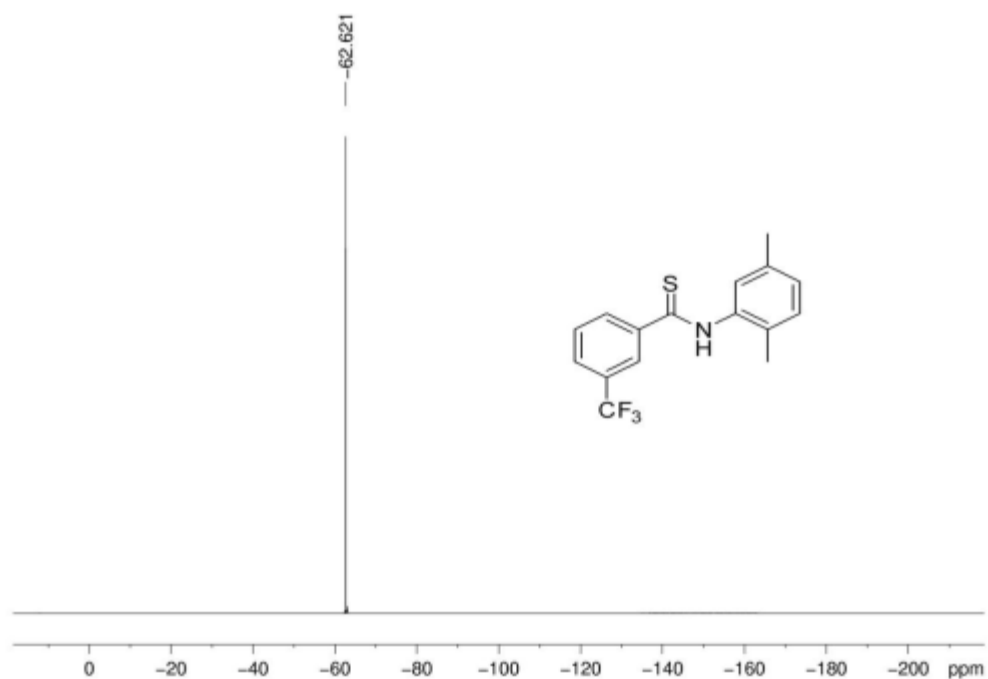

**Compound 3ei**

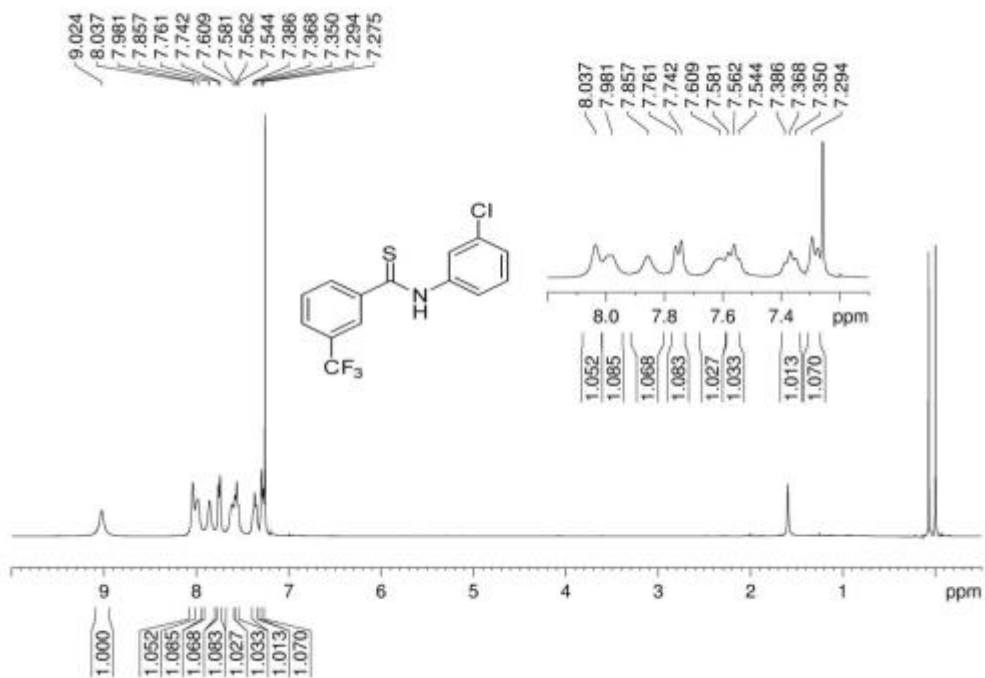

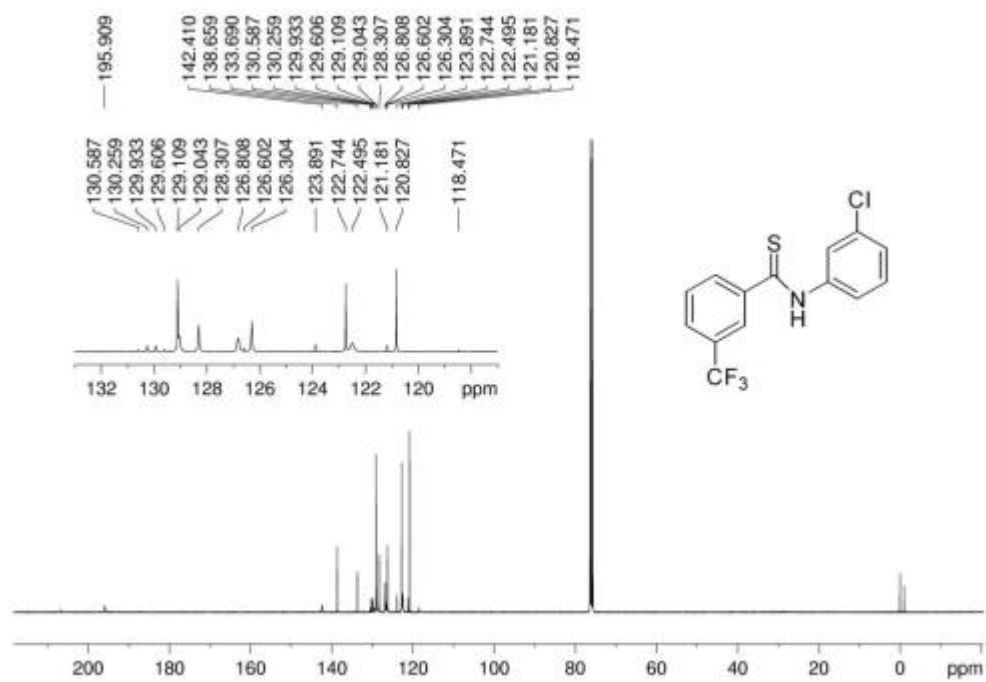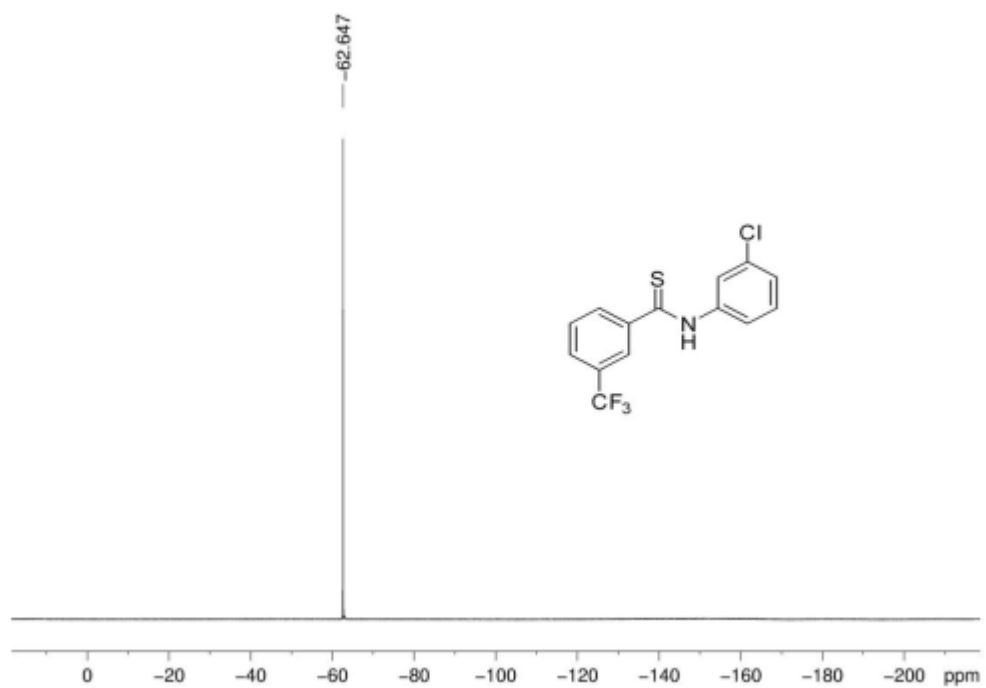

**Compound 3ej**

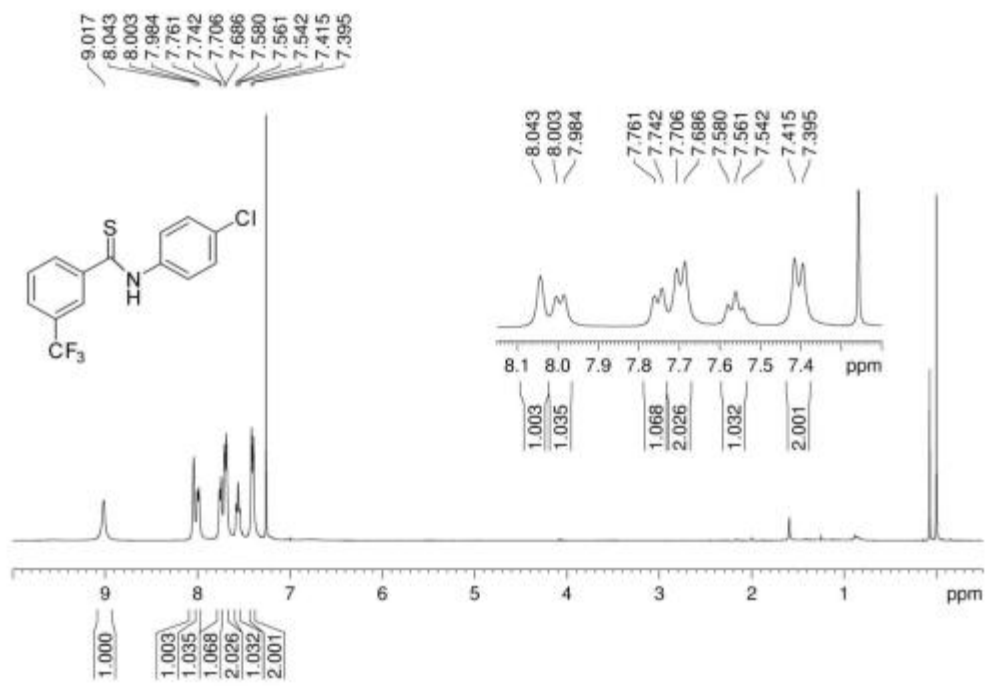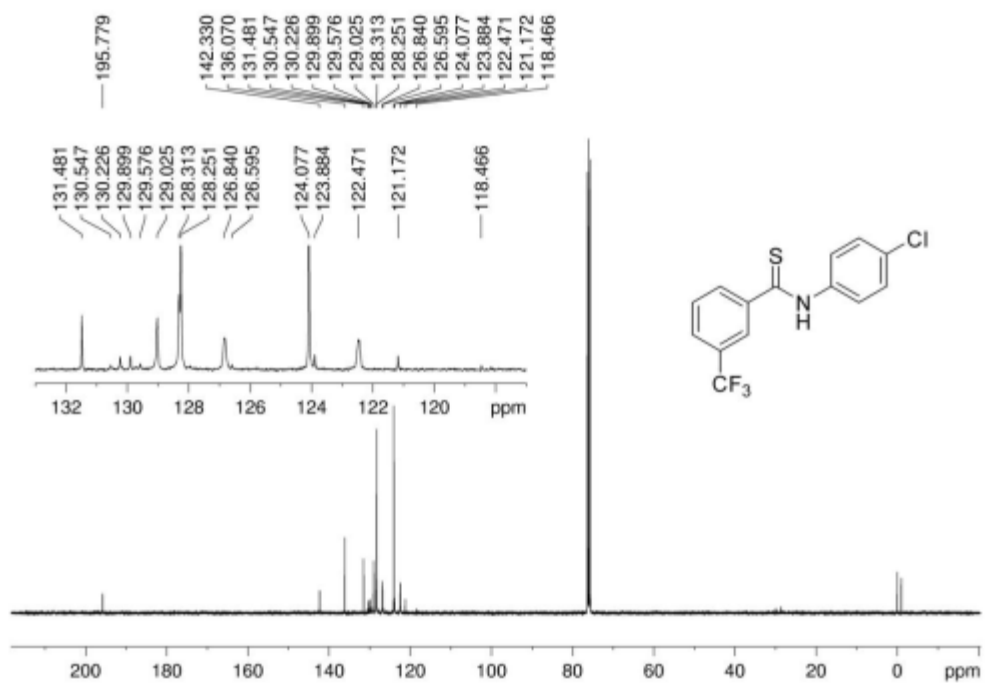



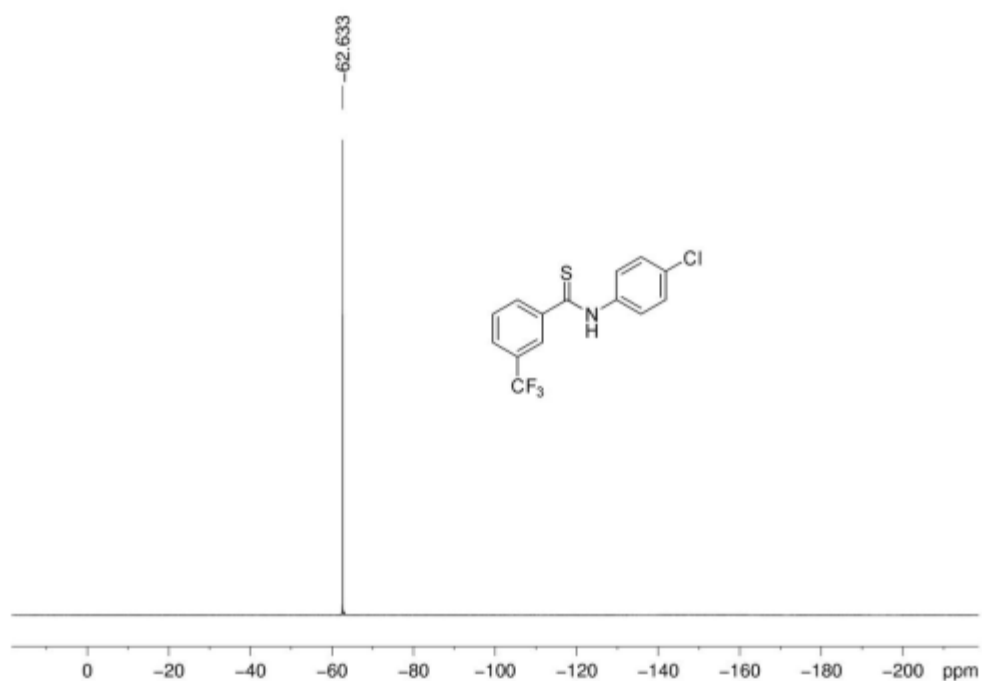

### Compound 3ek

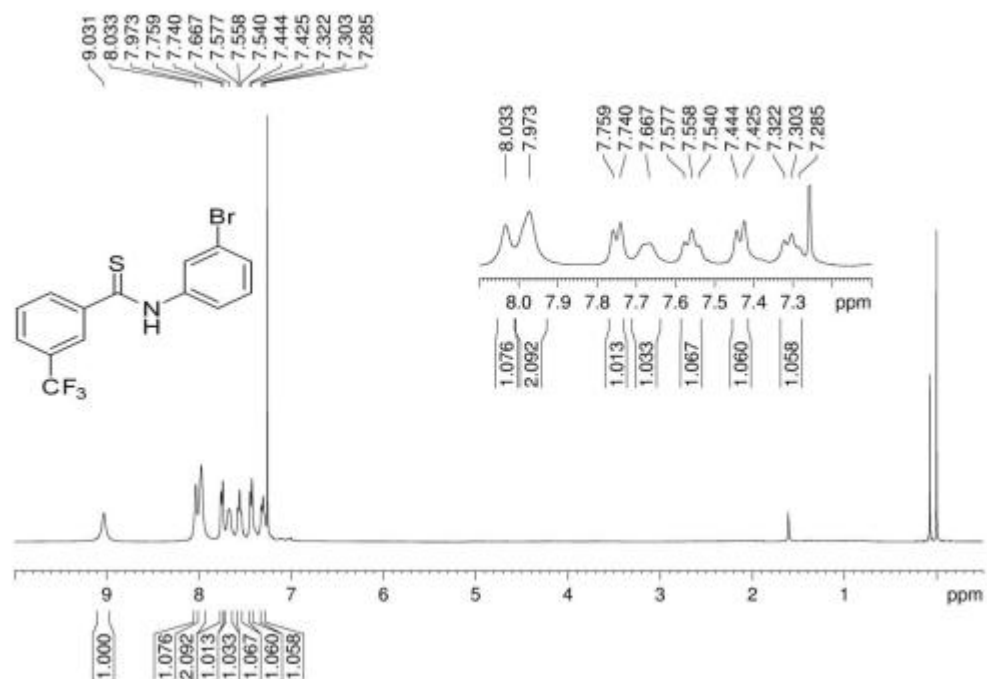

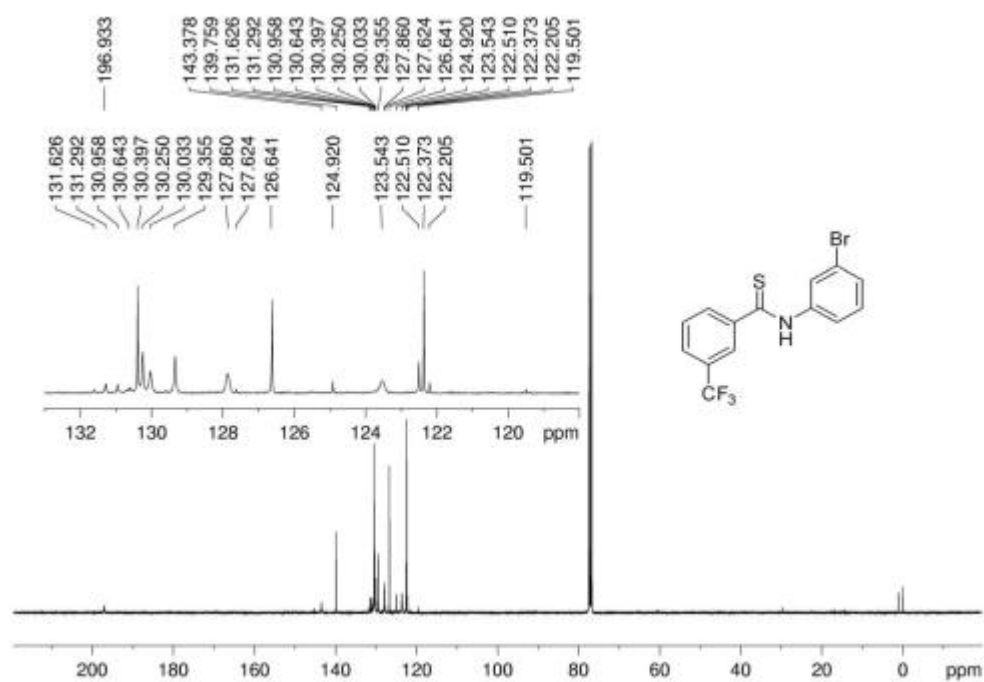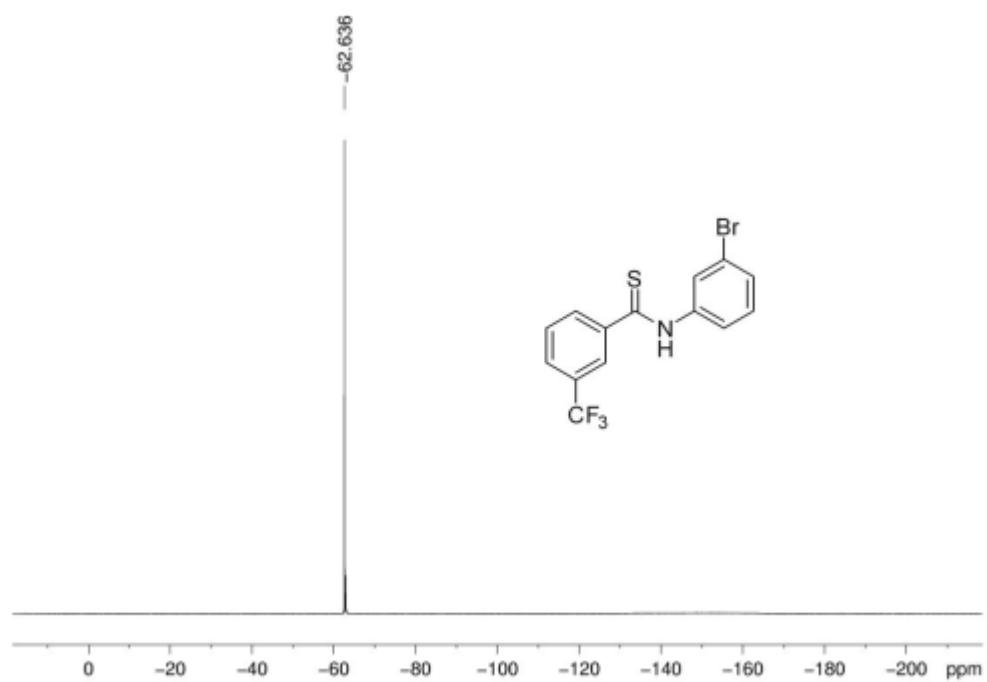

**Compound 3el**

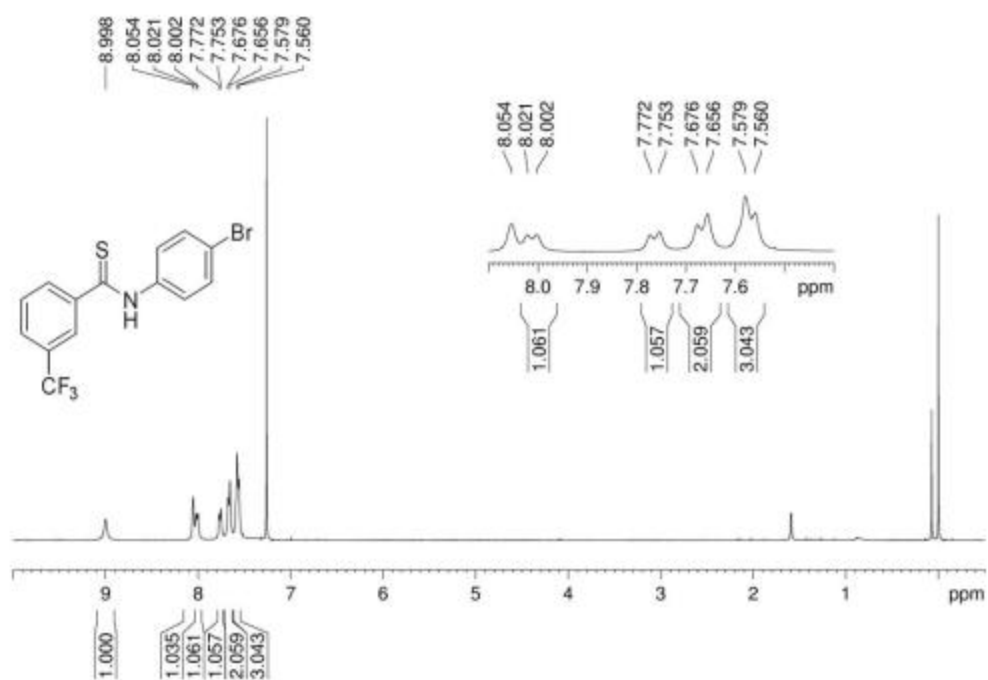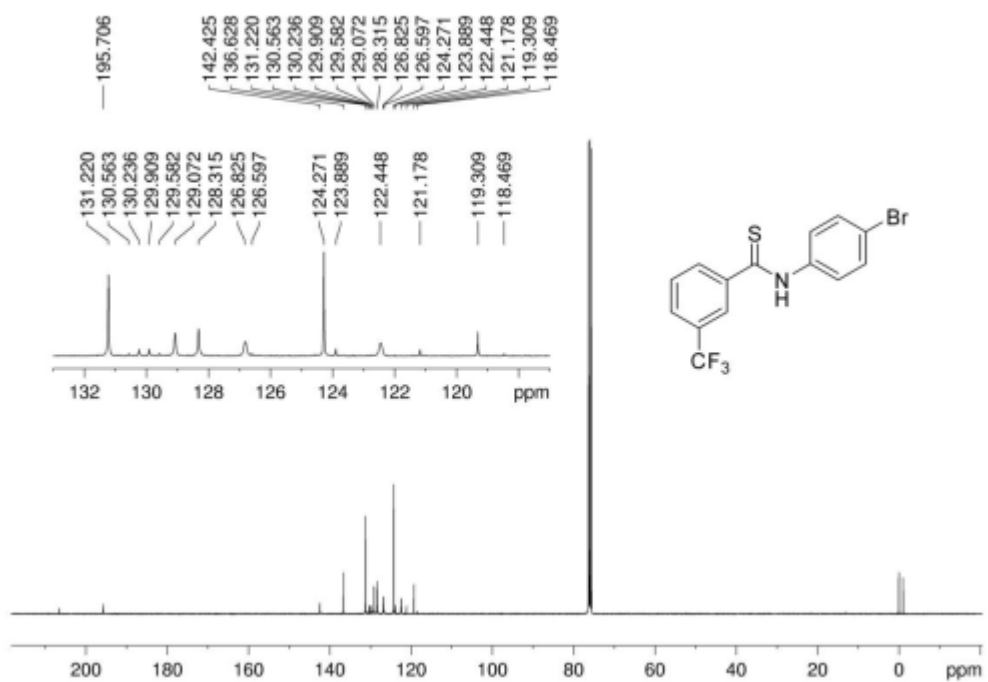

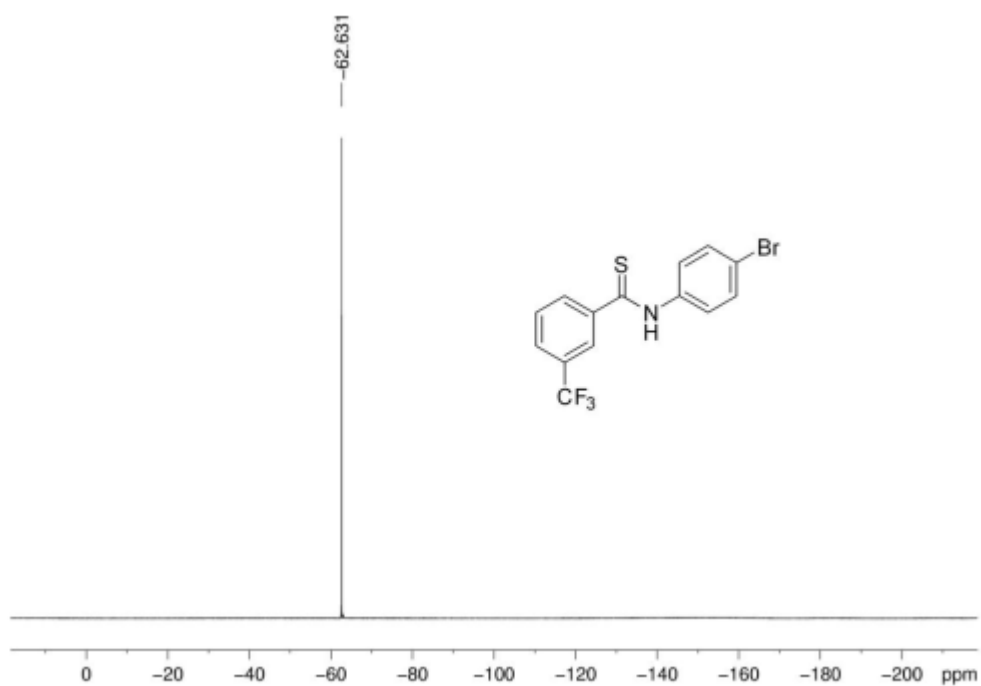

**Compound 3em**

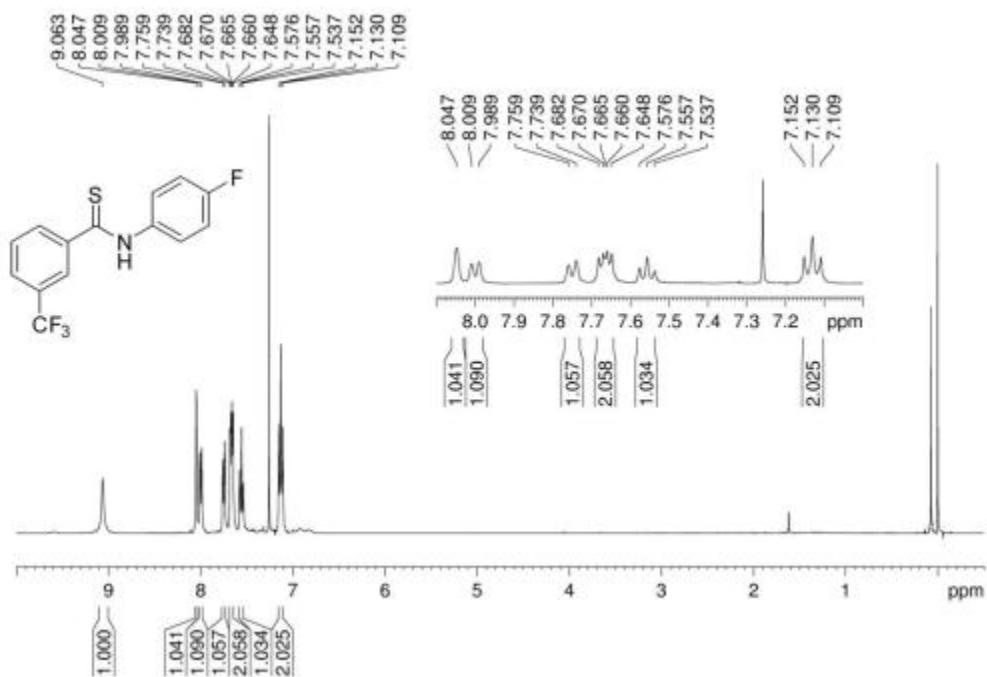

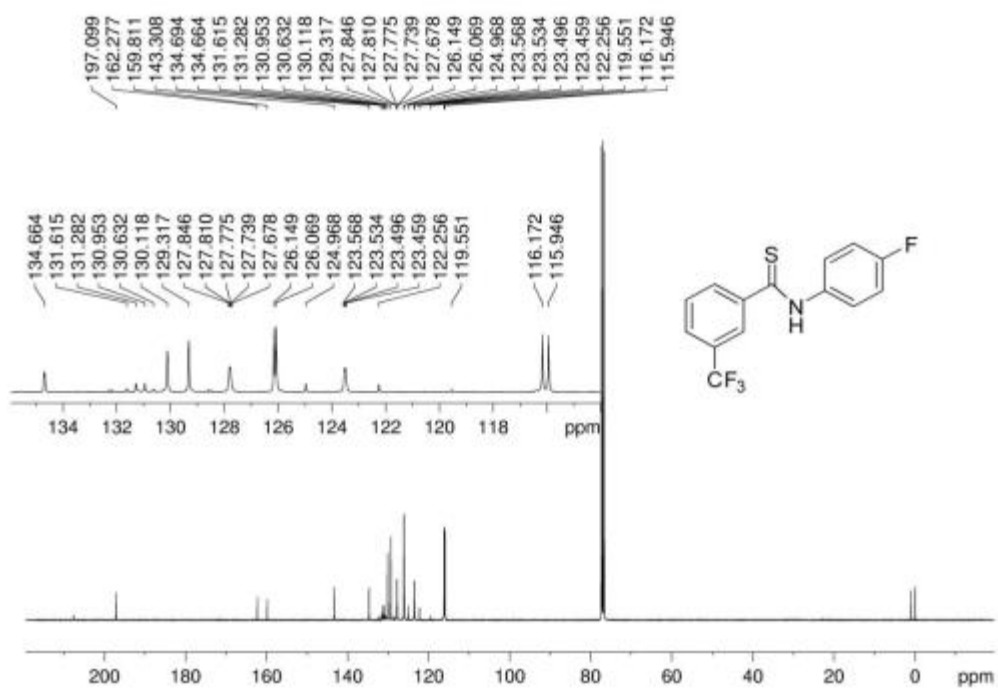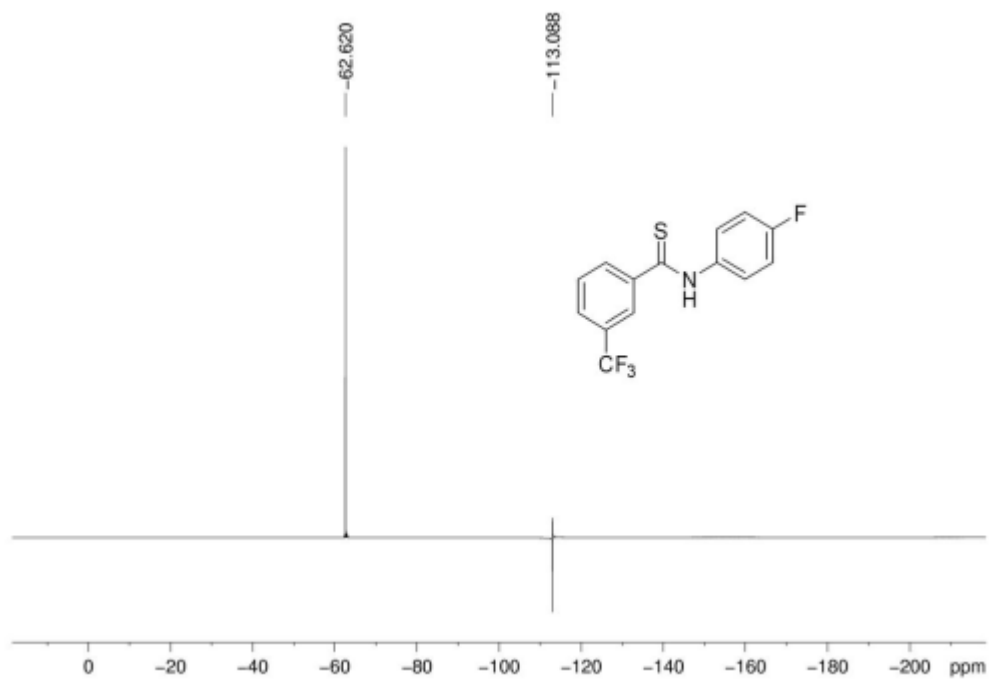

Compound 3en

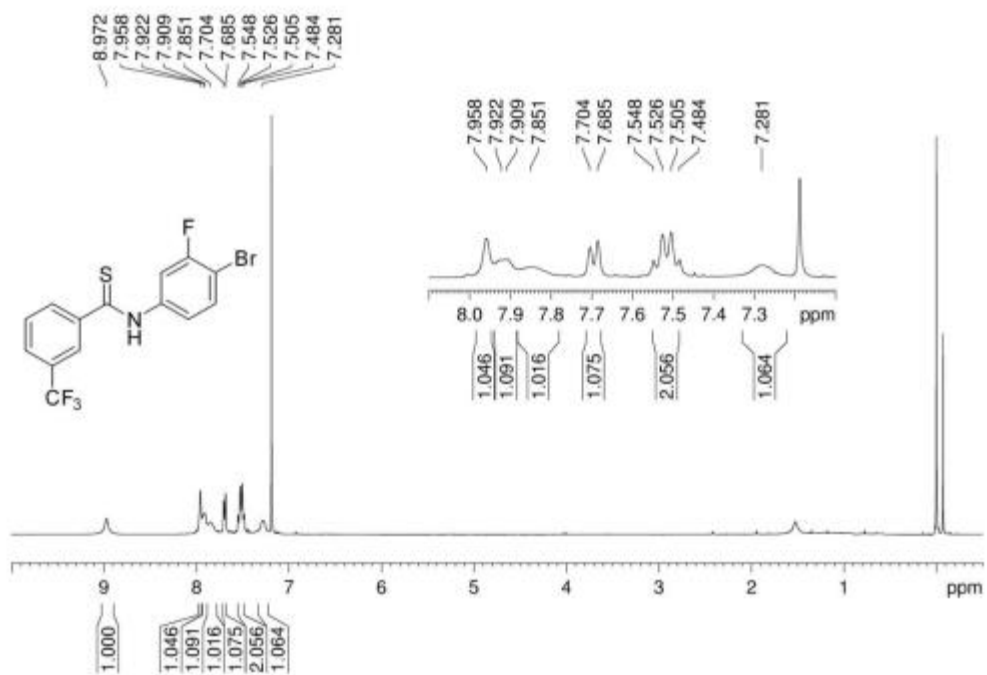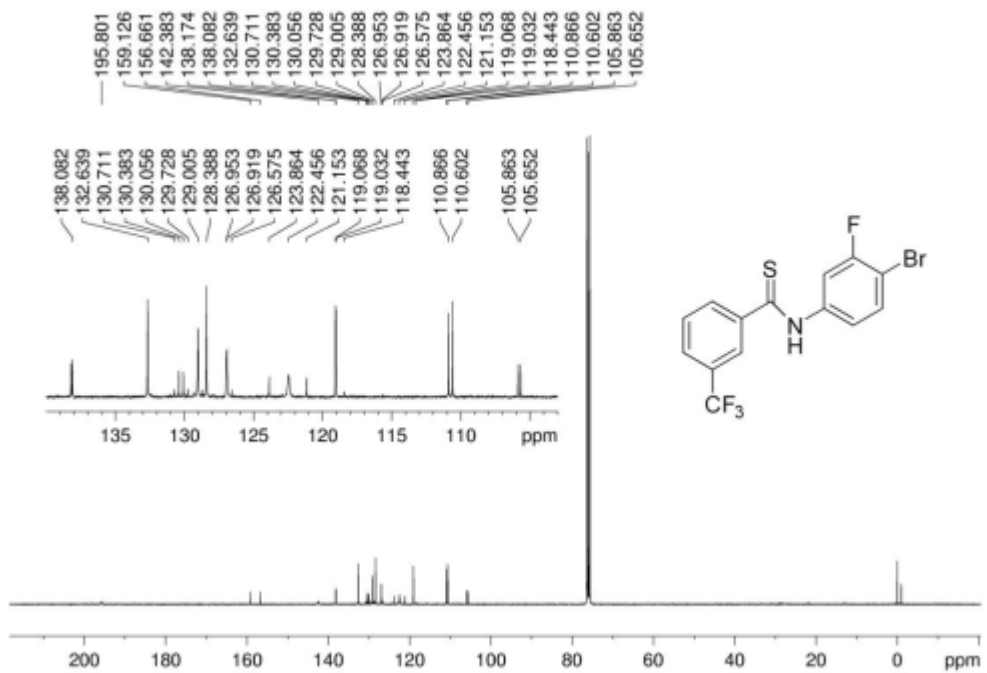

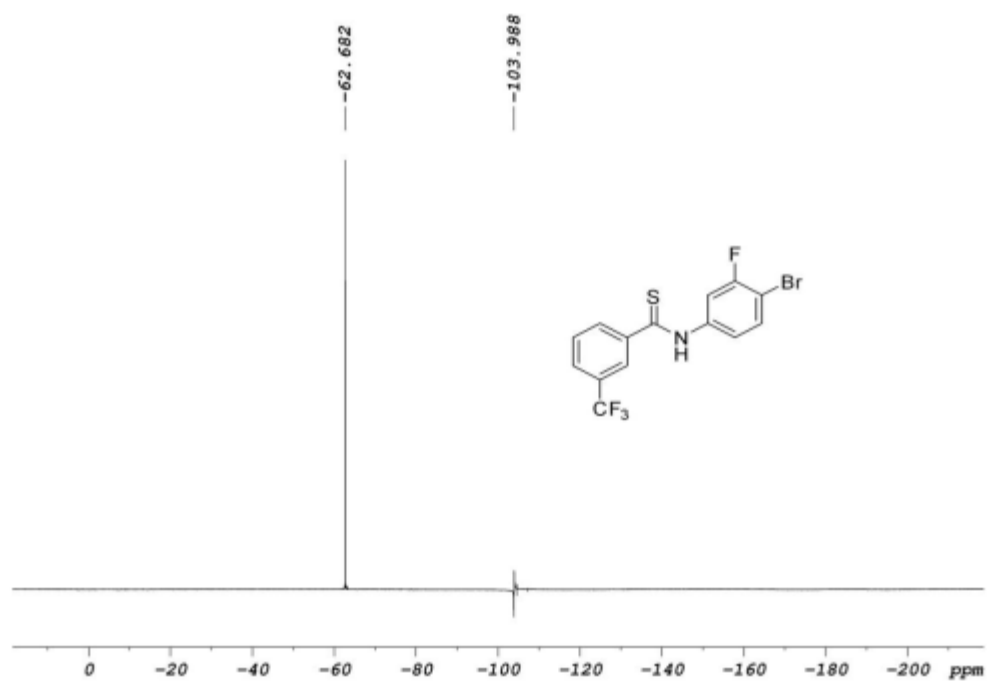

### Compound 3eo

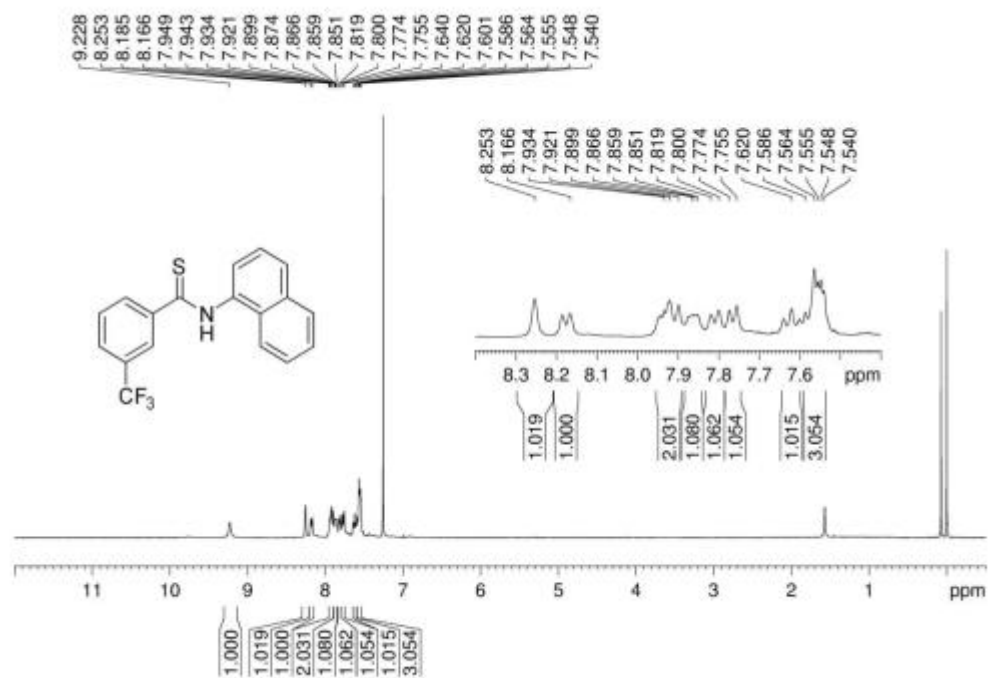

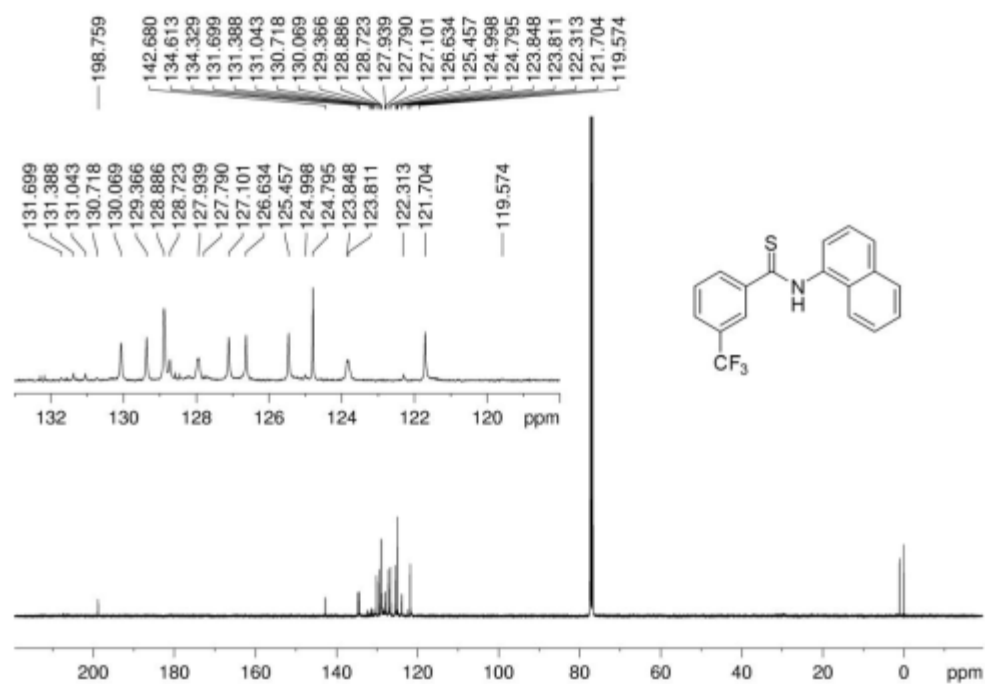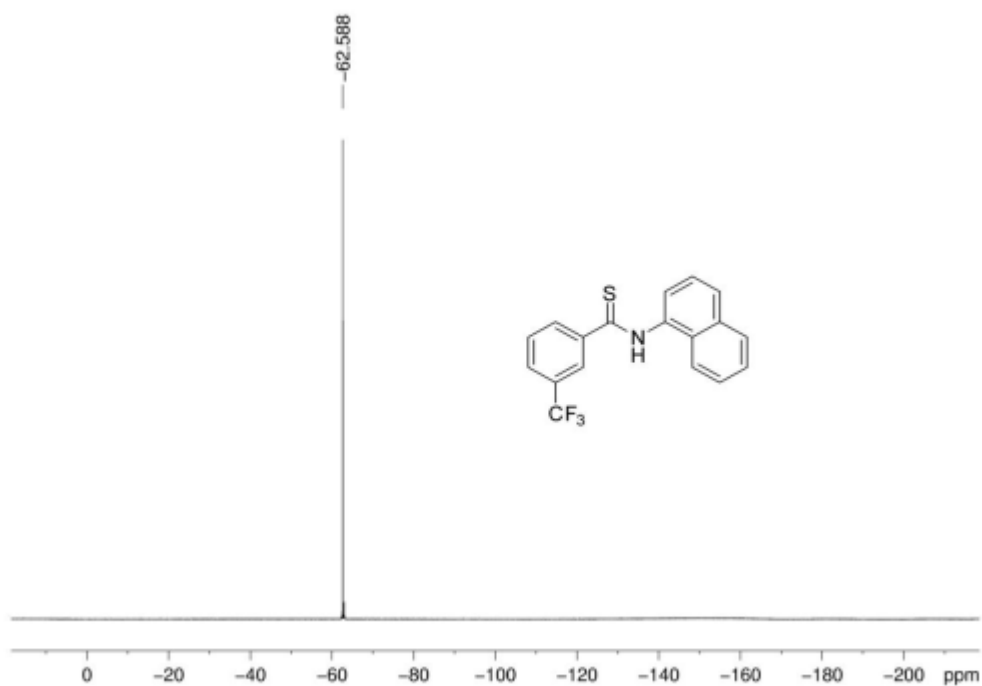

Compound 3ep



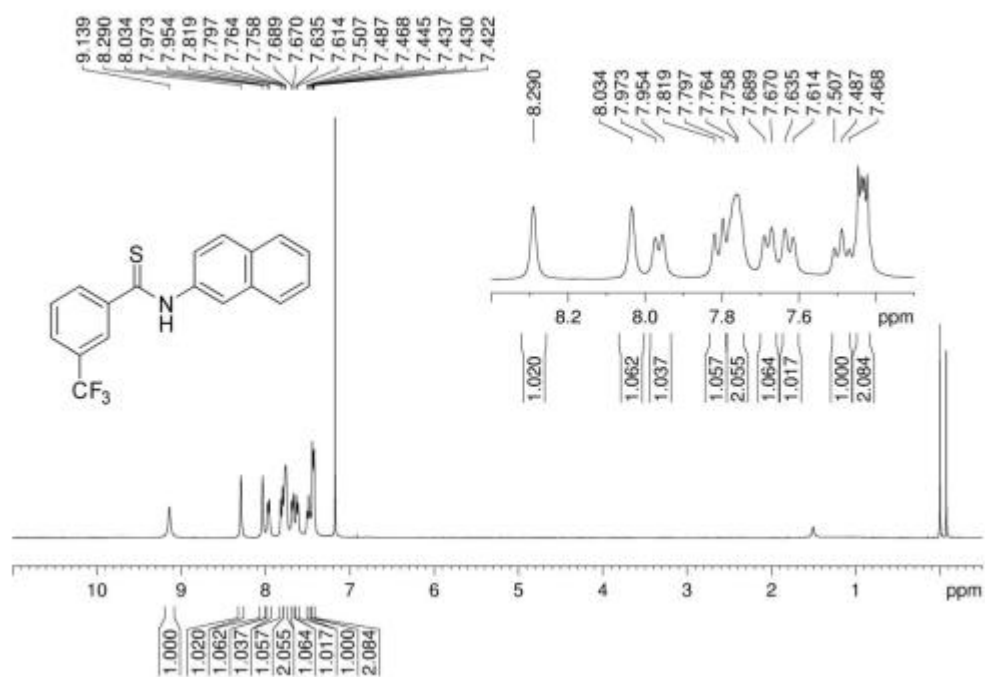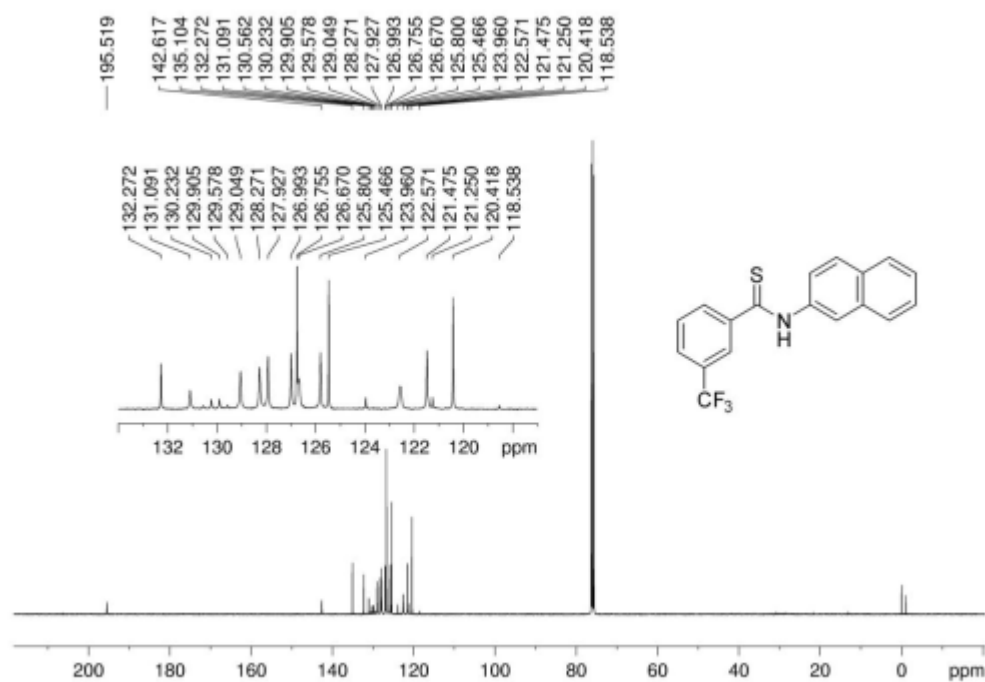

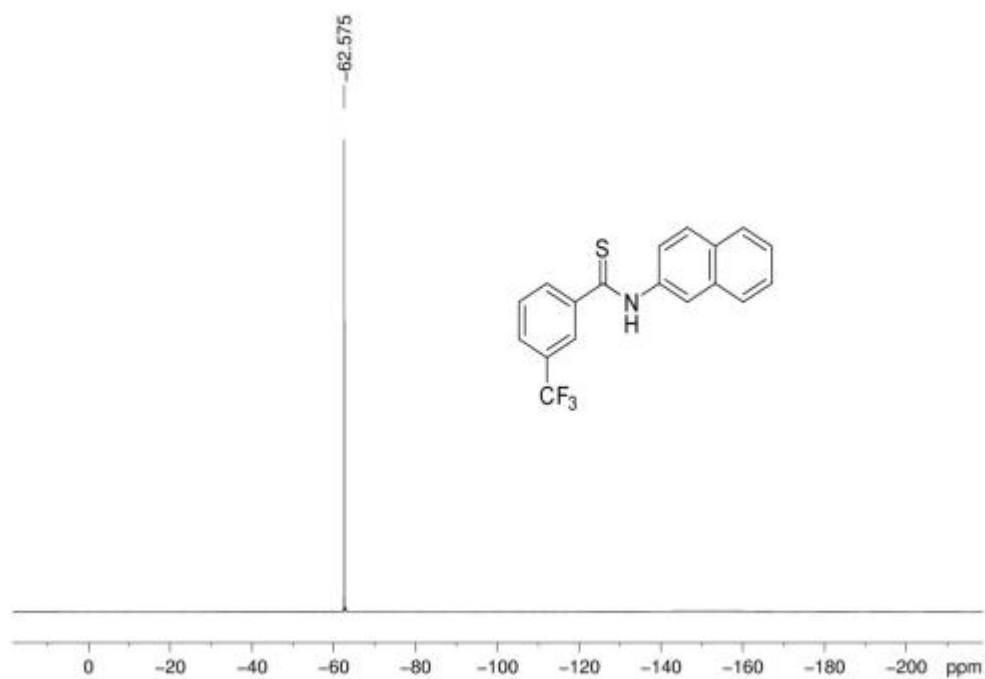

### Compound 3hb

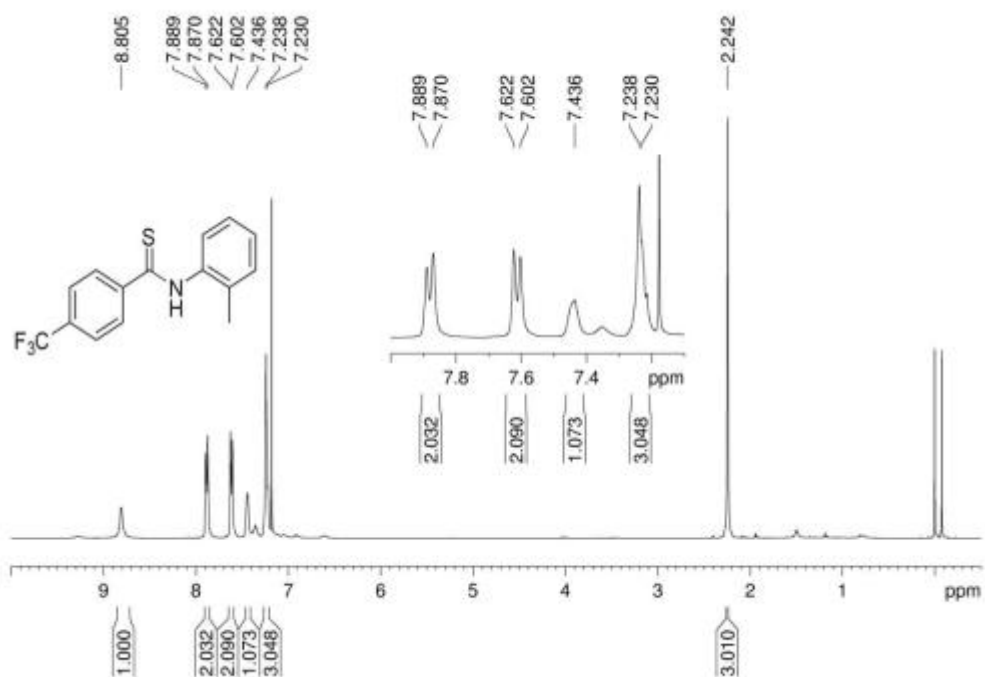

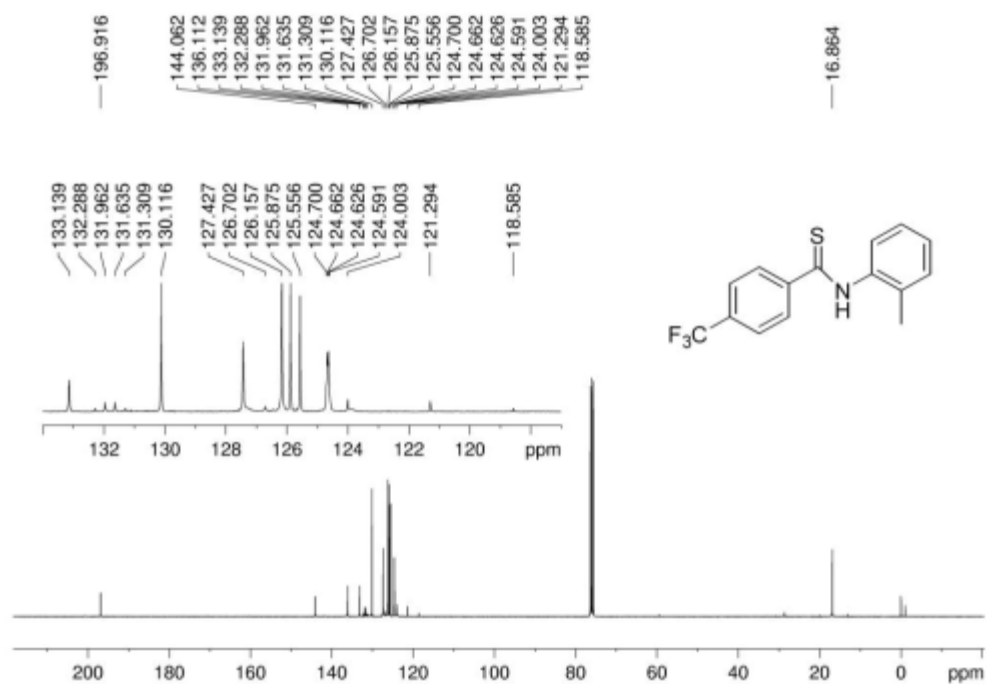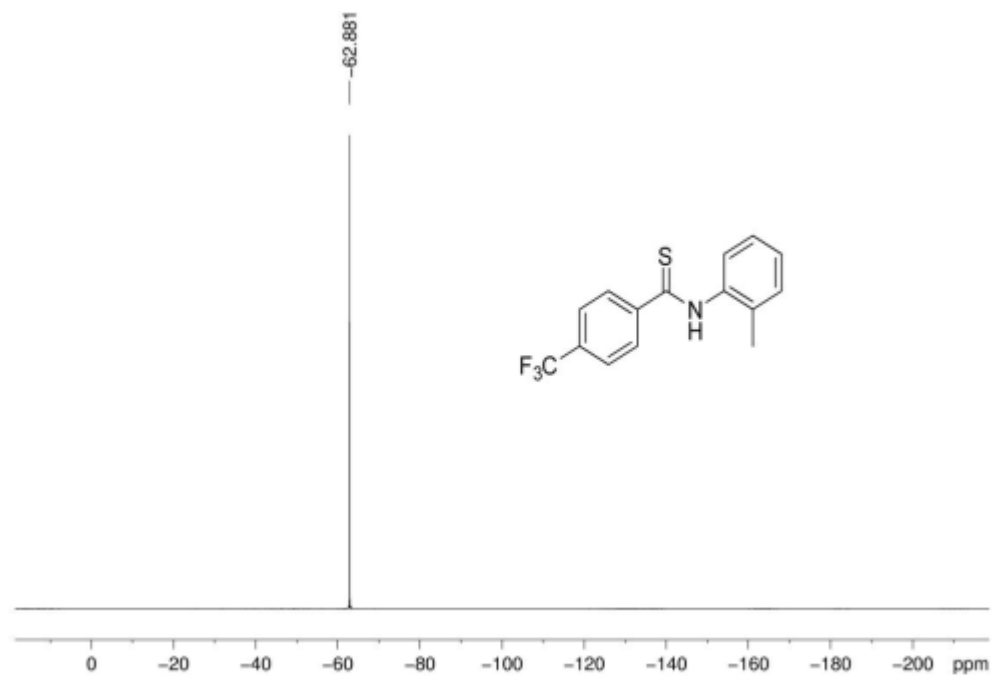

Compound 3hc

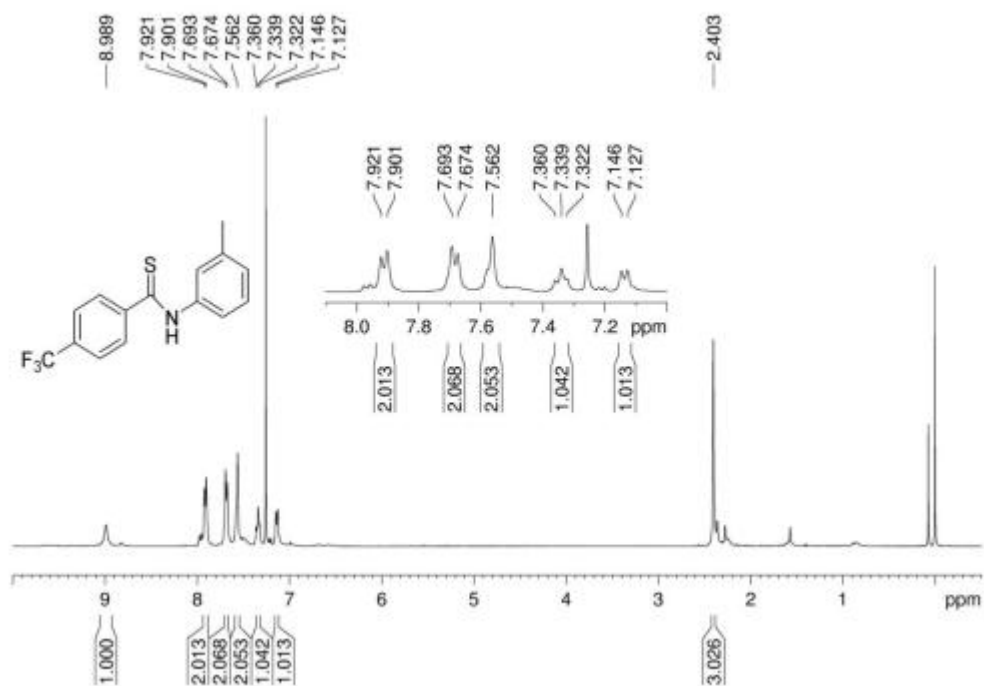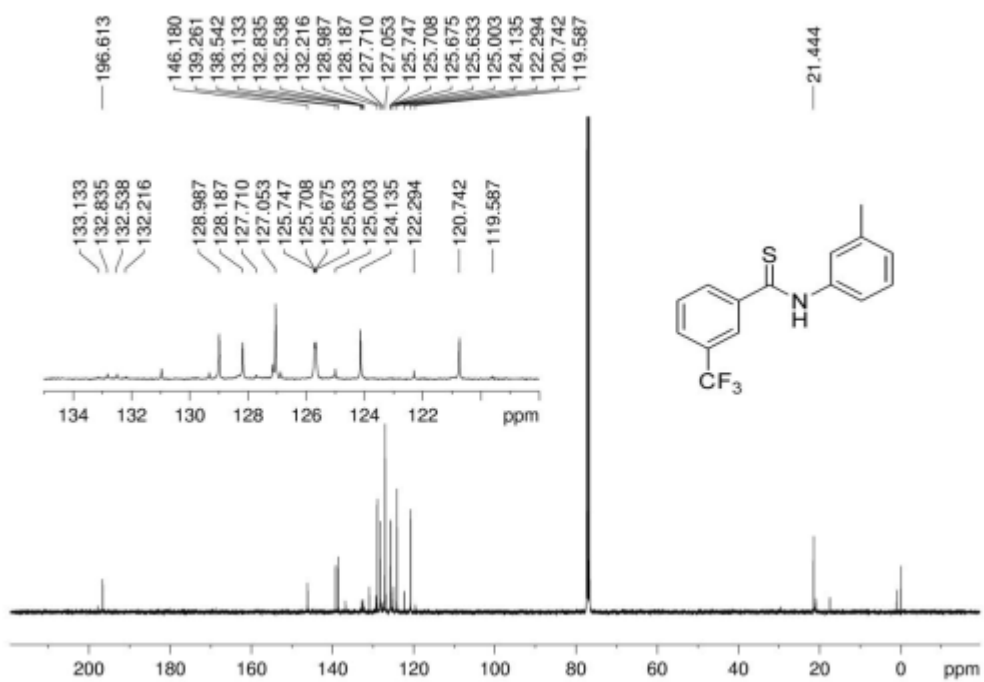

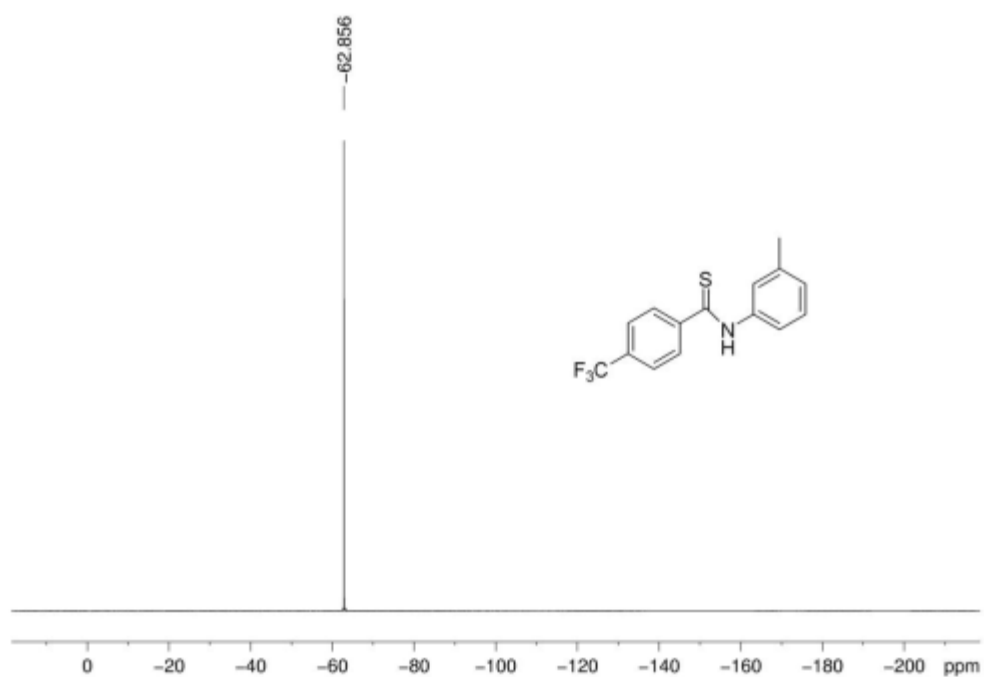

**Compound 3hd**

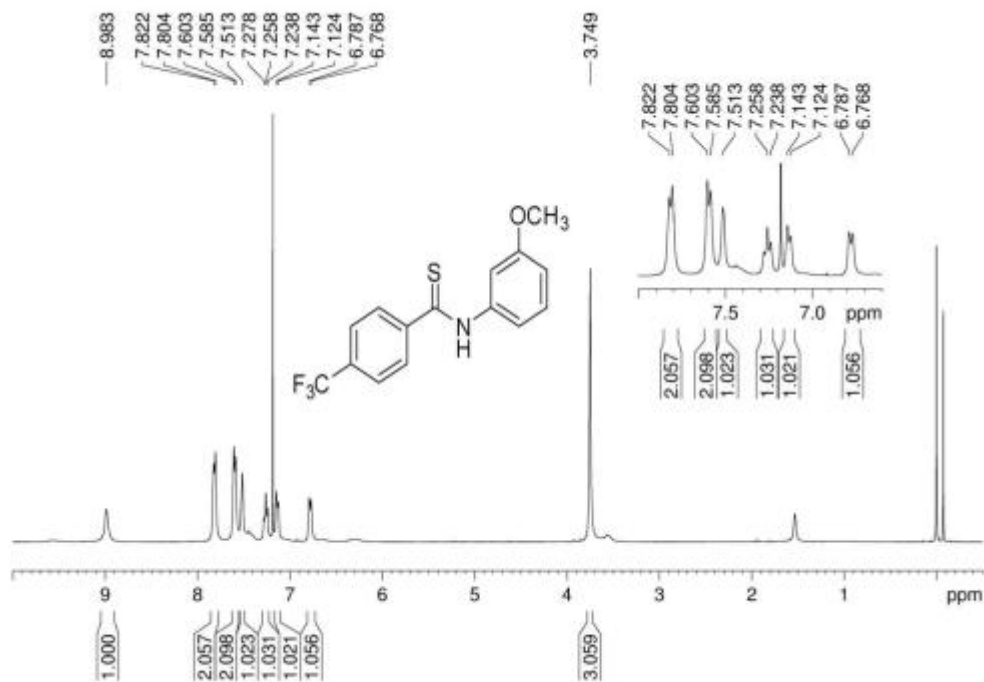

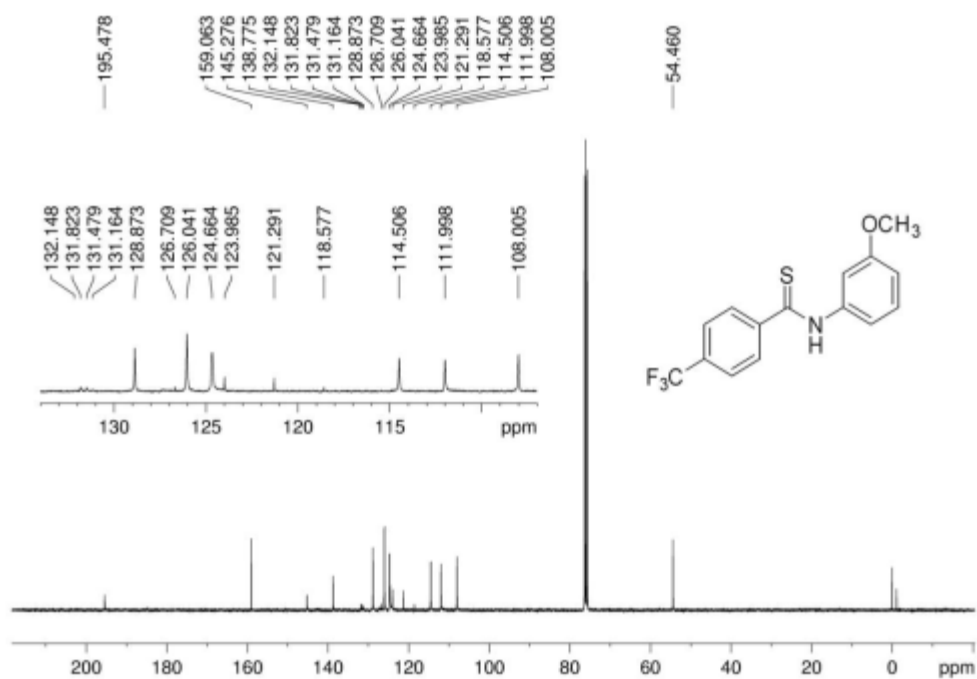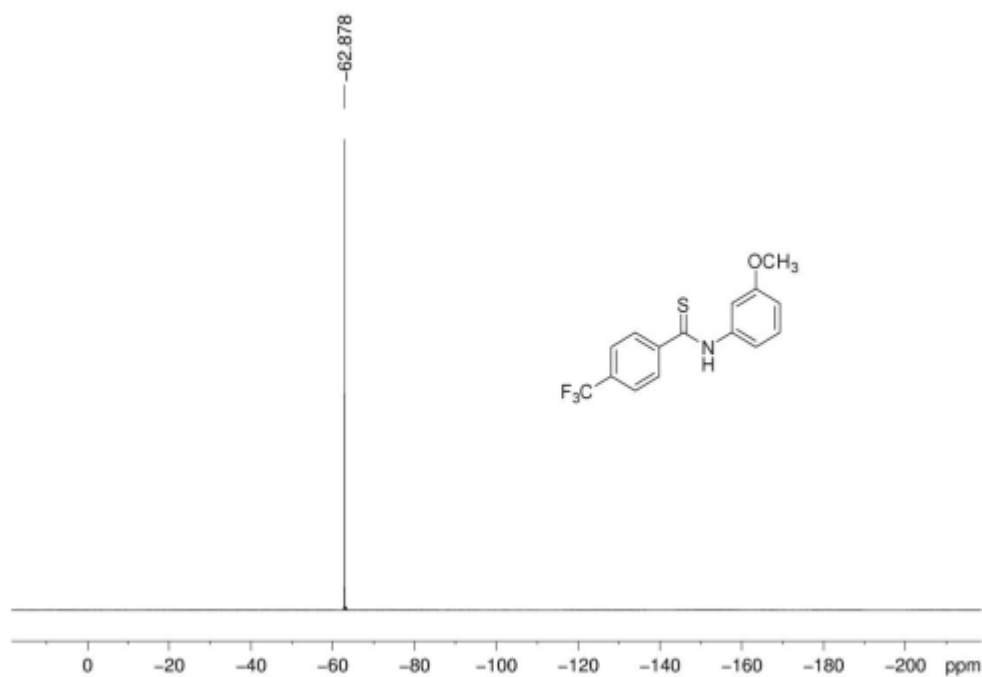

Compound 3he

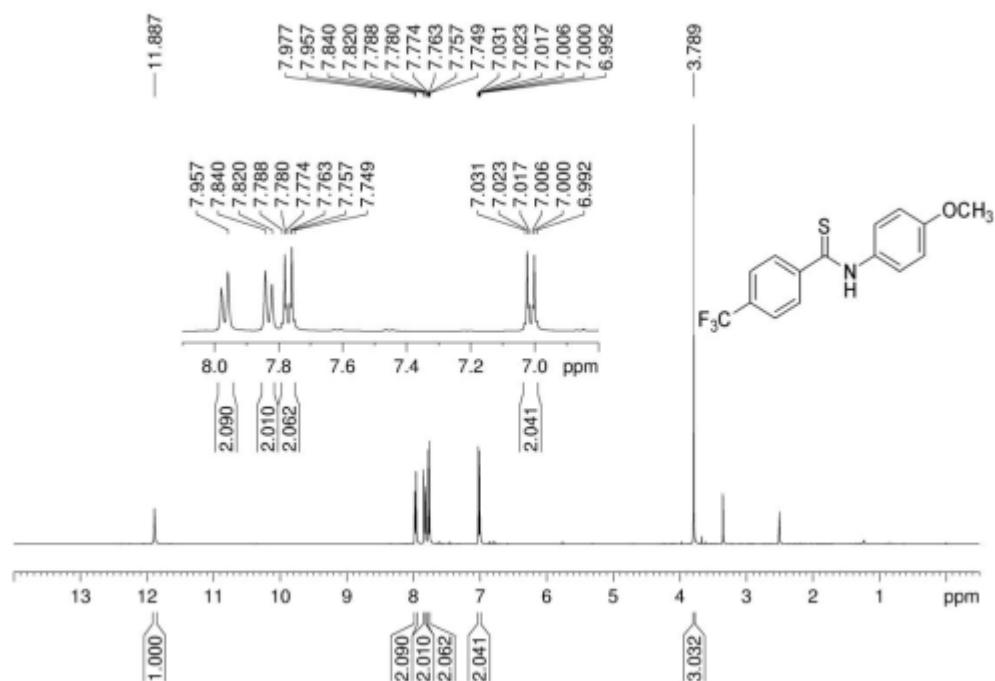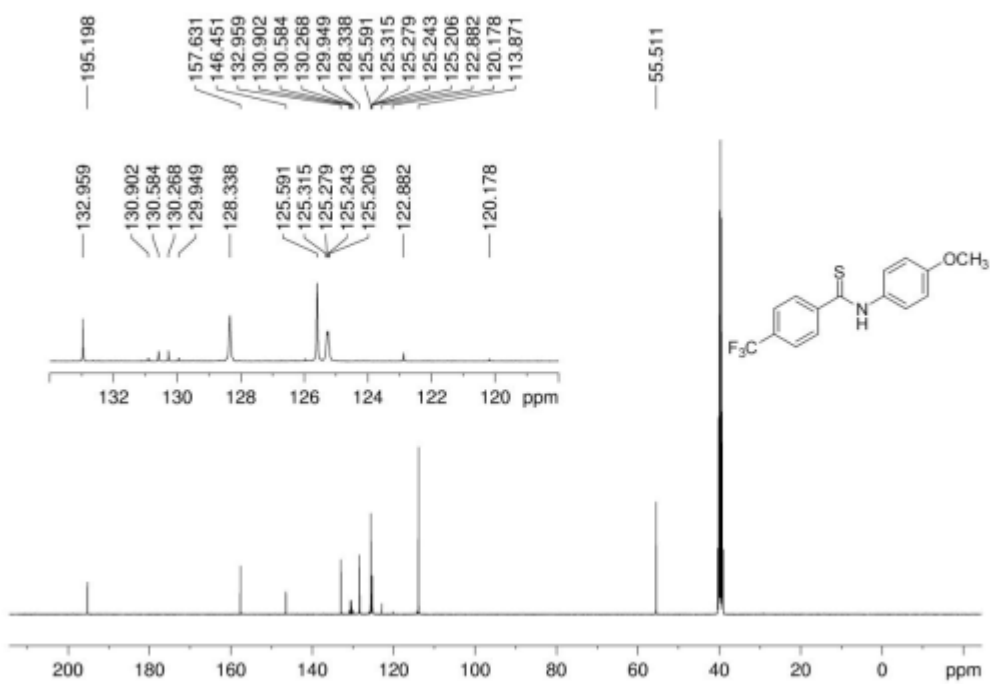

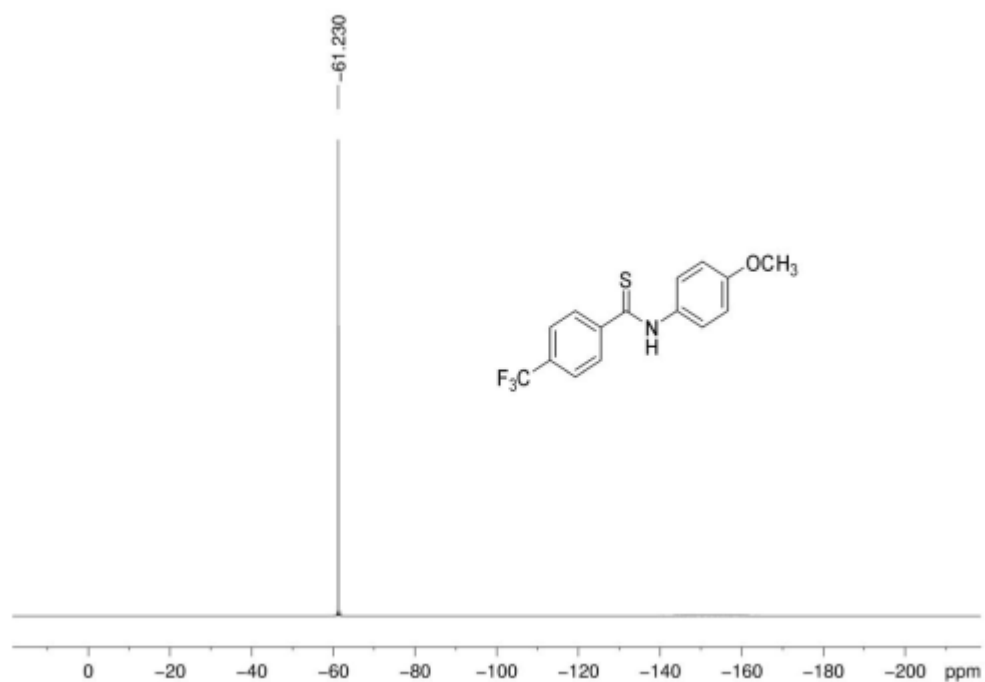

**Compound 3hg**

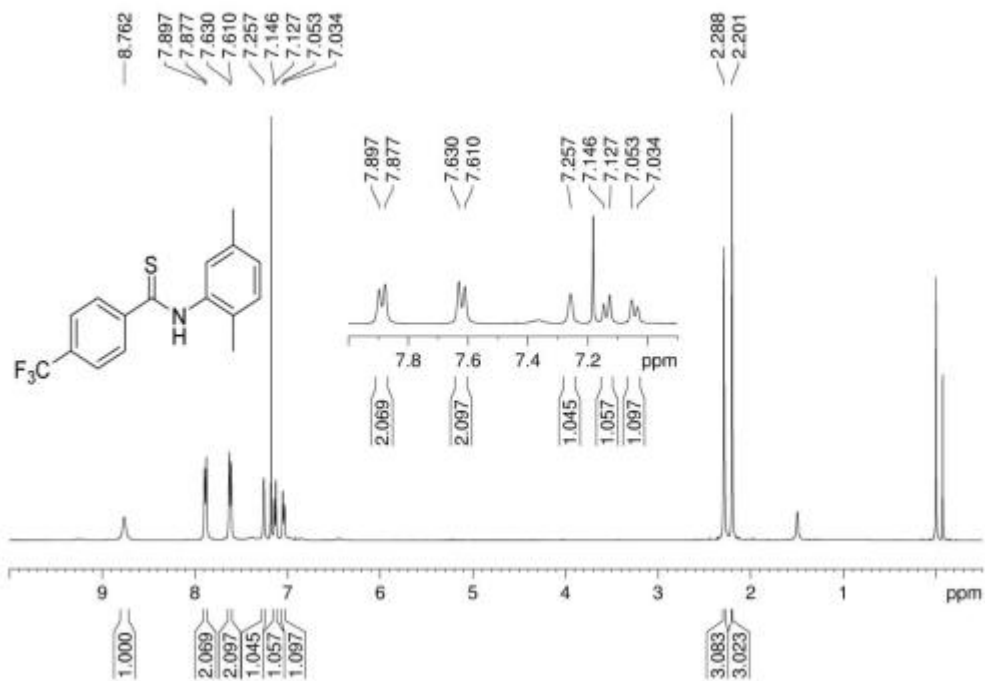



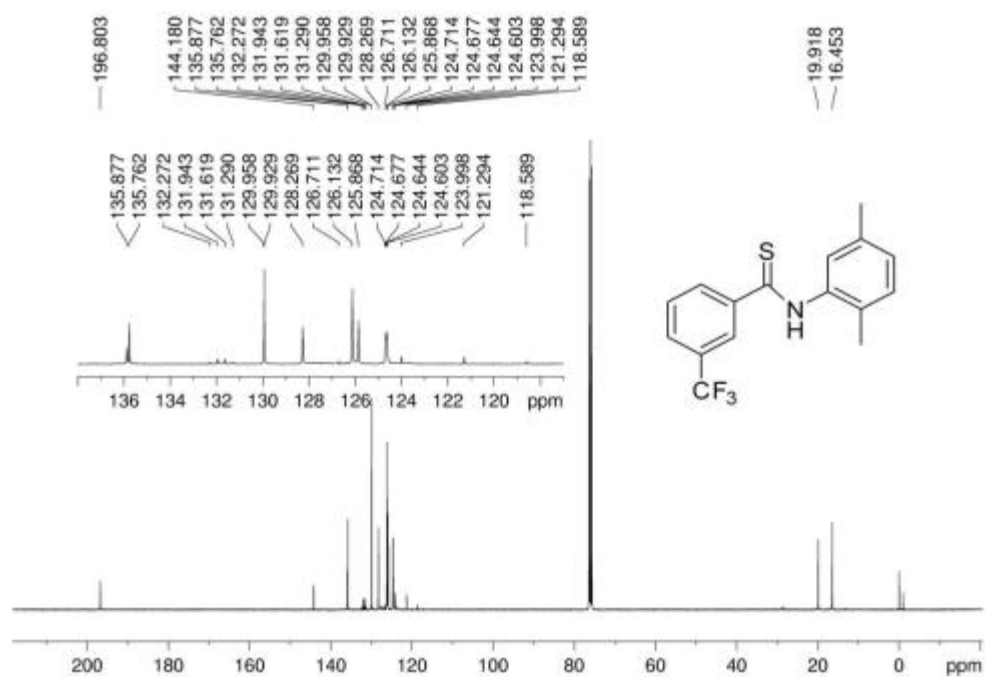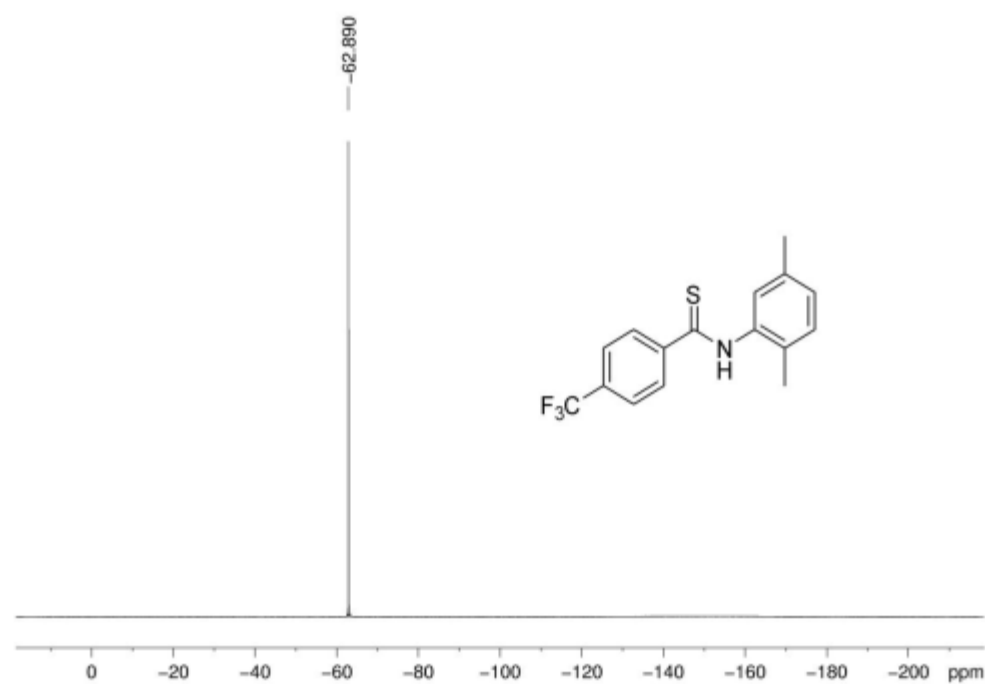

**Compound 3hi**

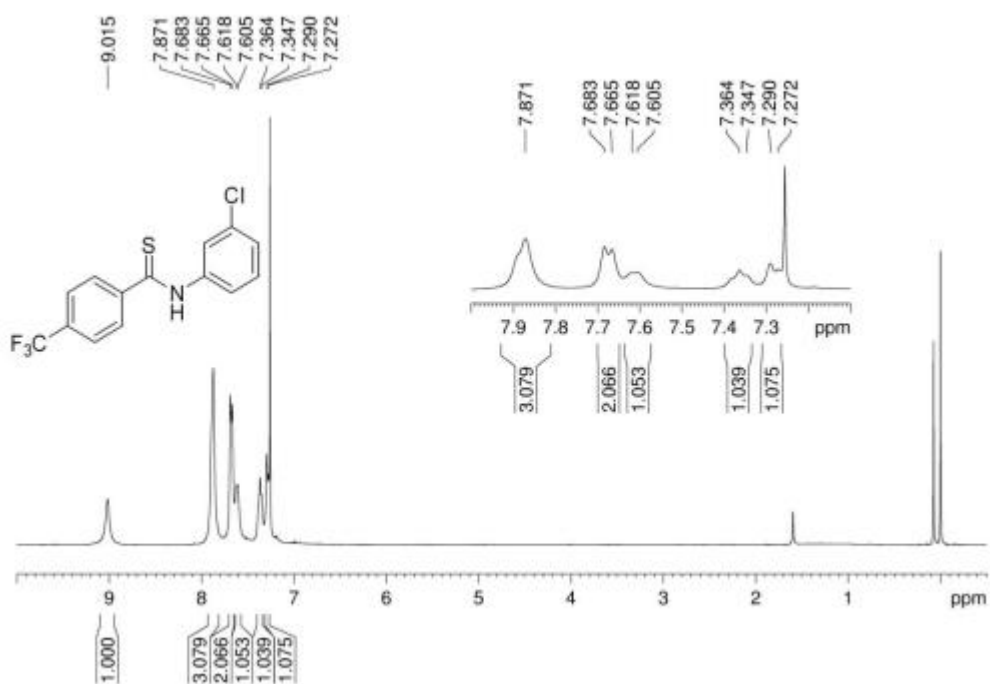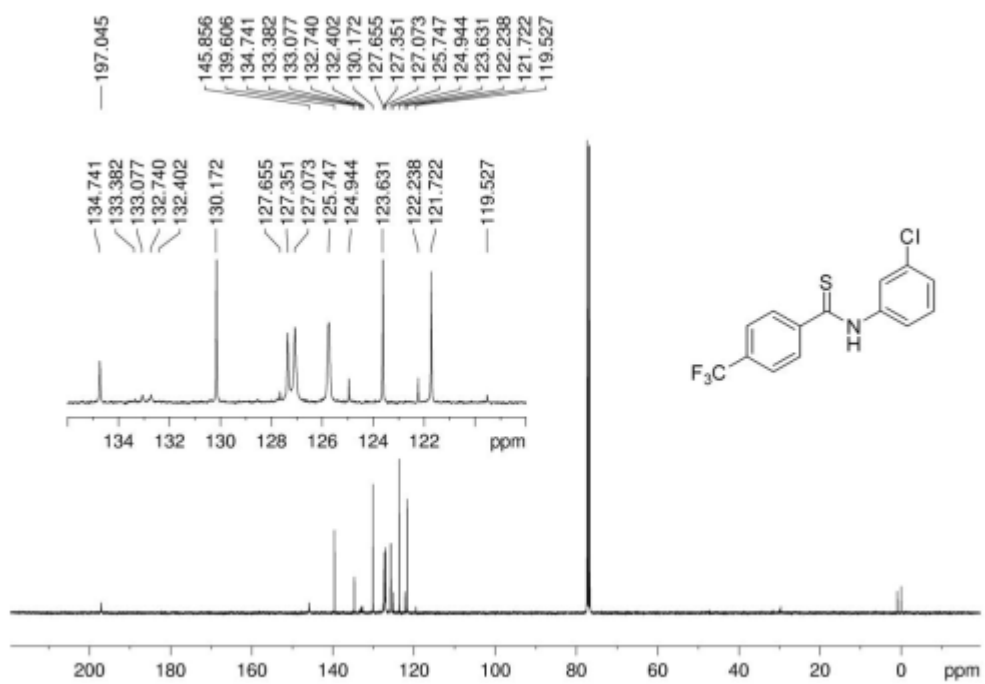

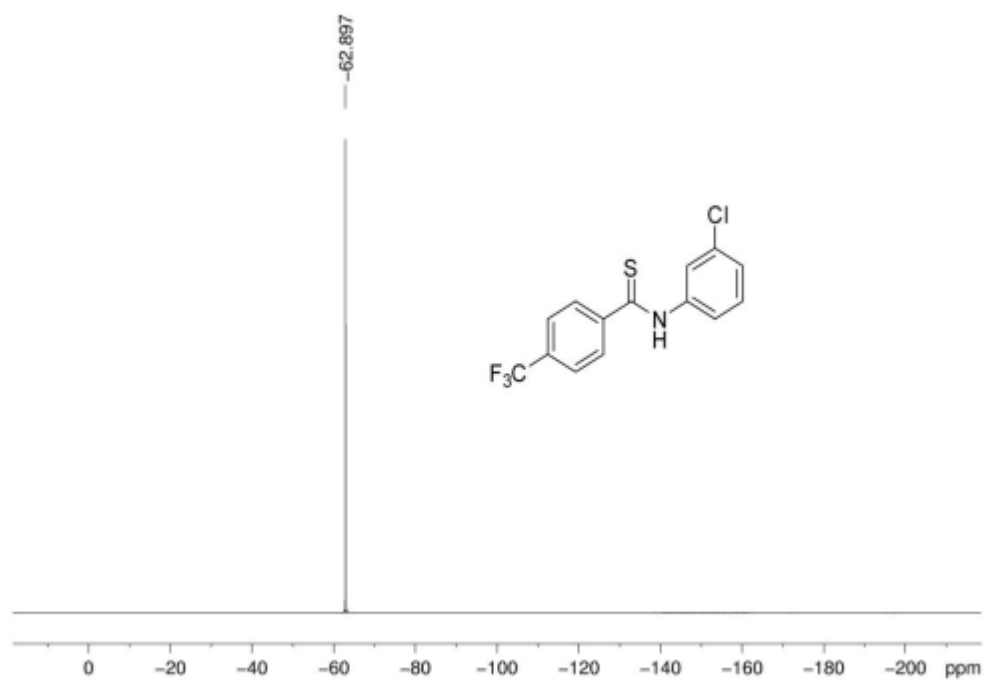

**Compound 3hj**

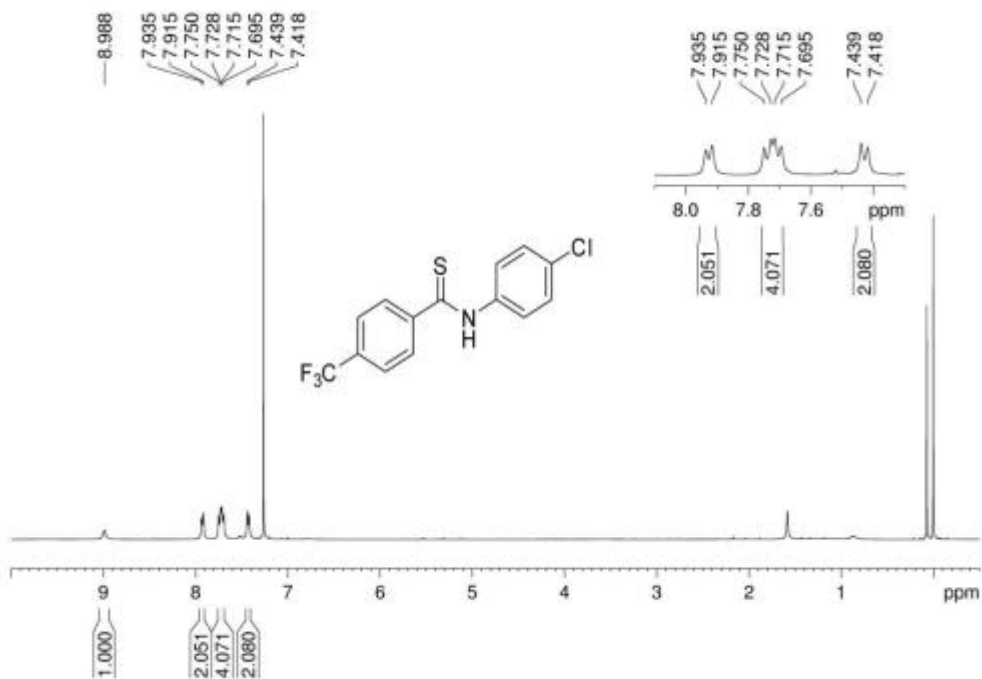

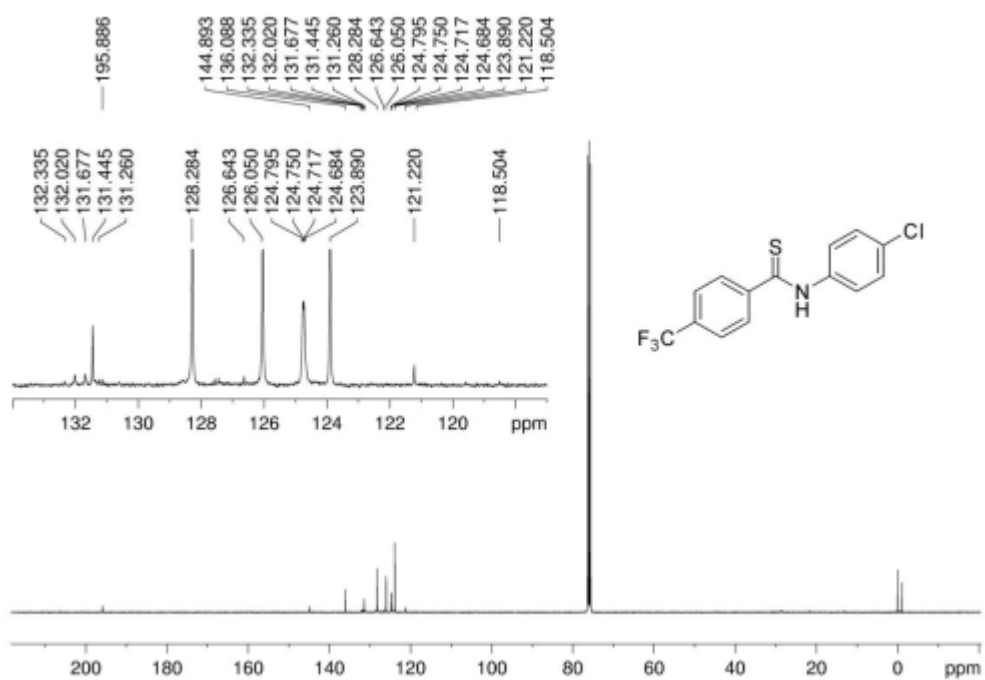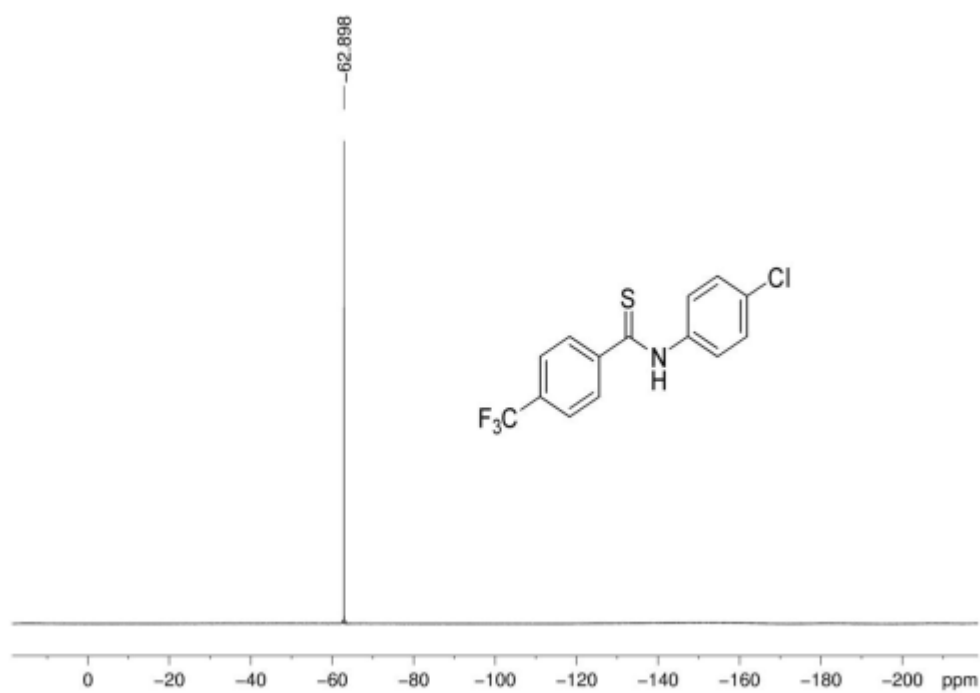

**Compound 3hk**

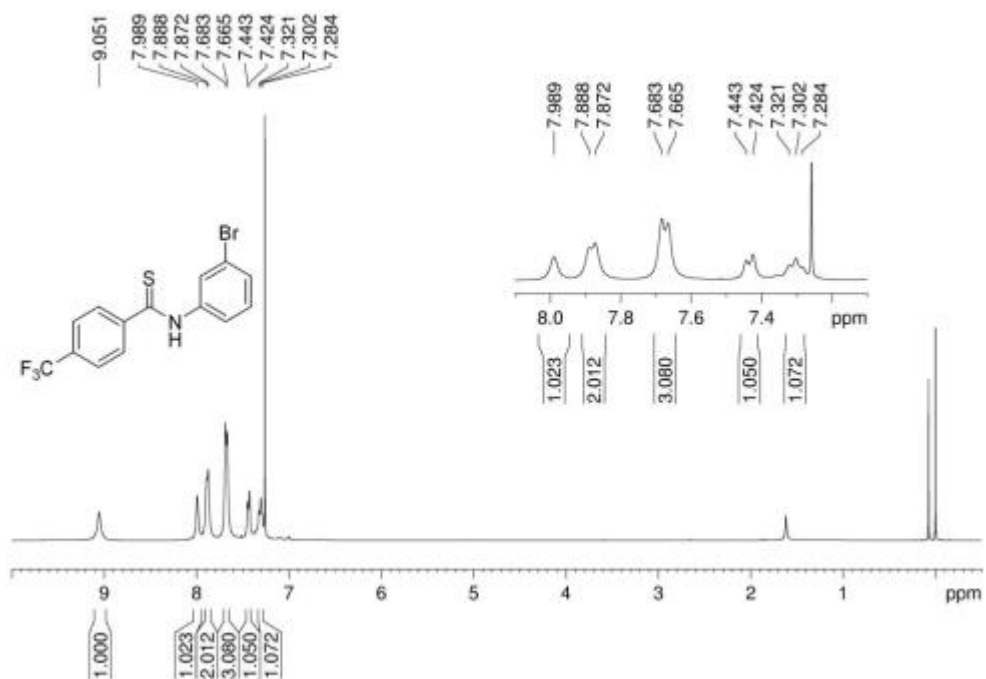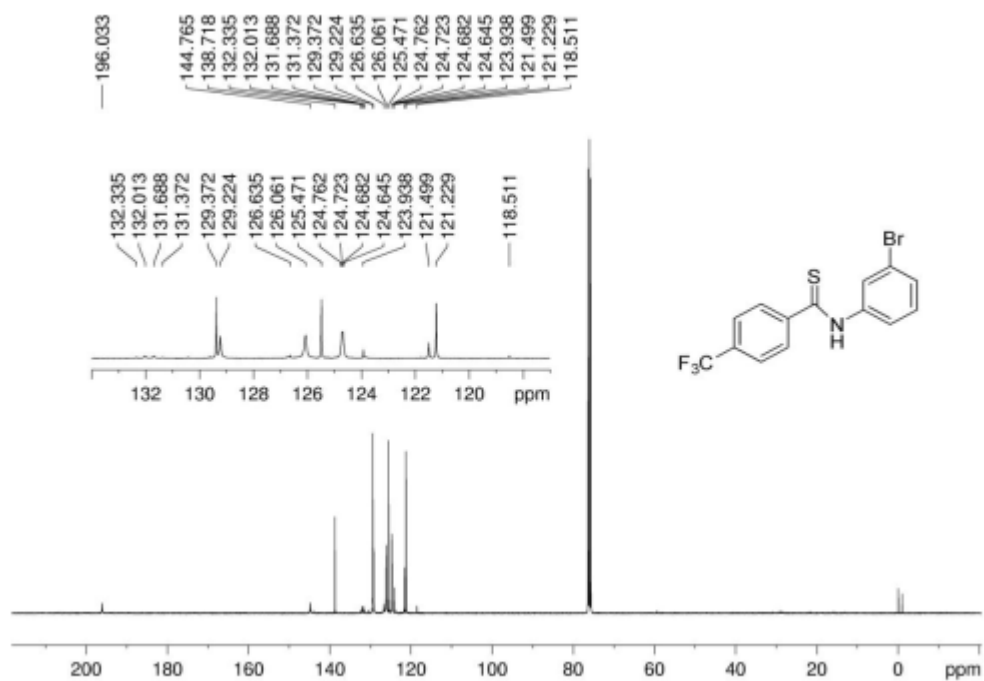

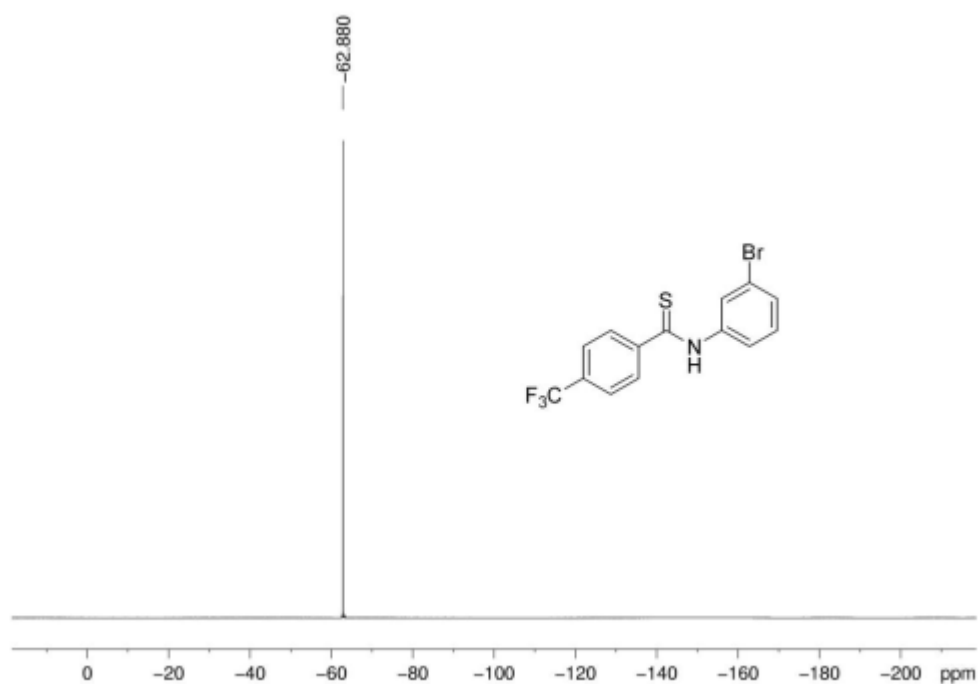

**Compound 3hl**

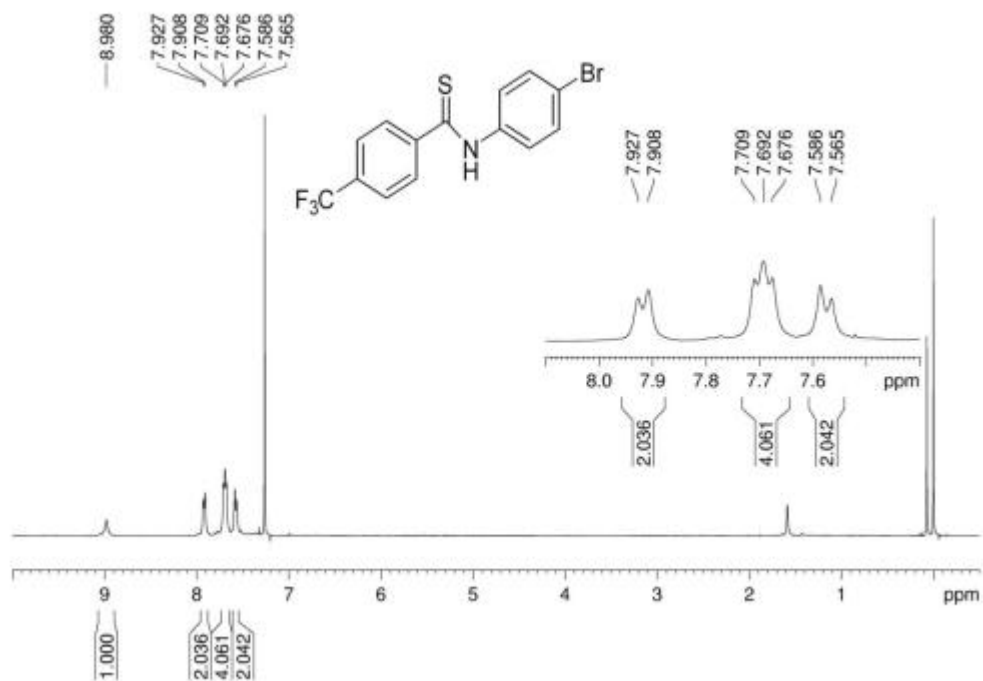

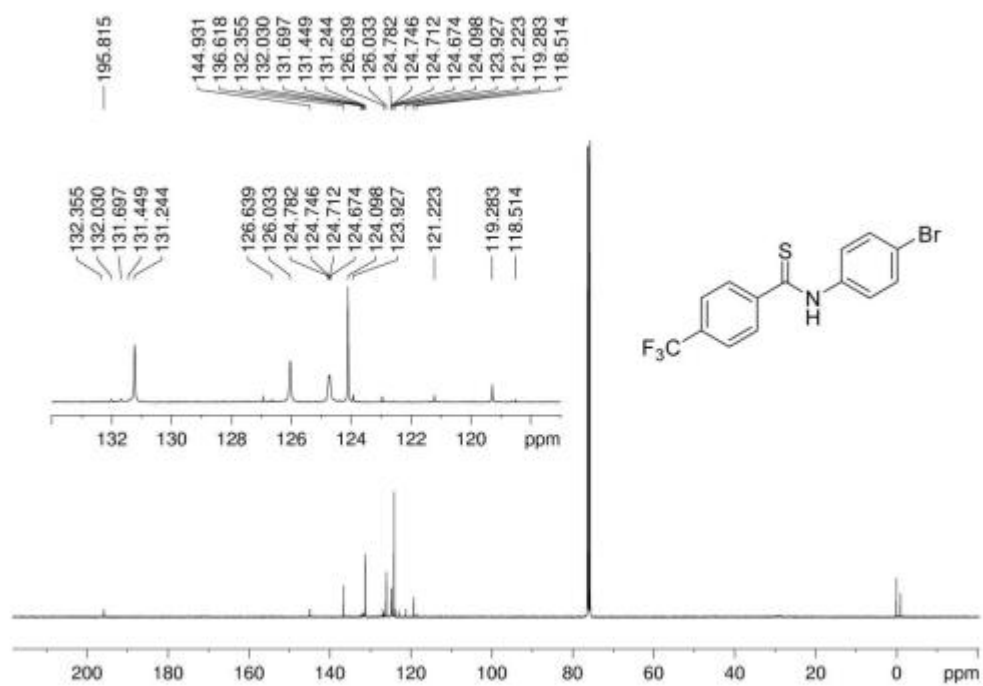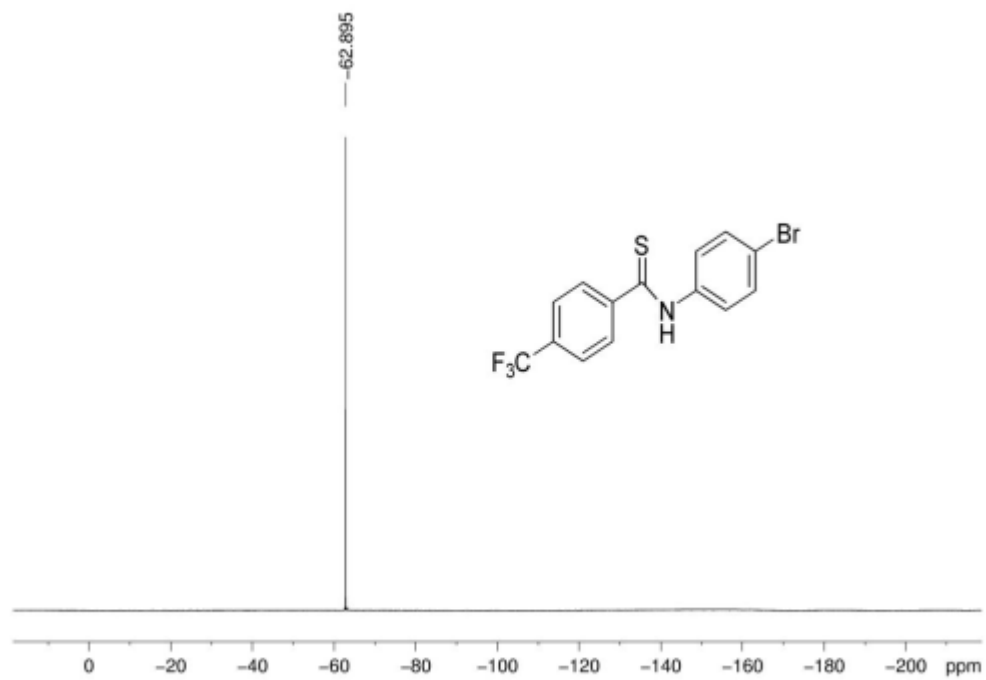

Compound 3hm

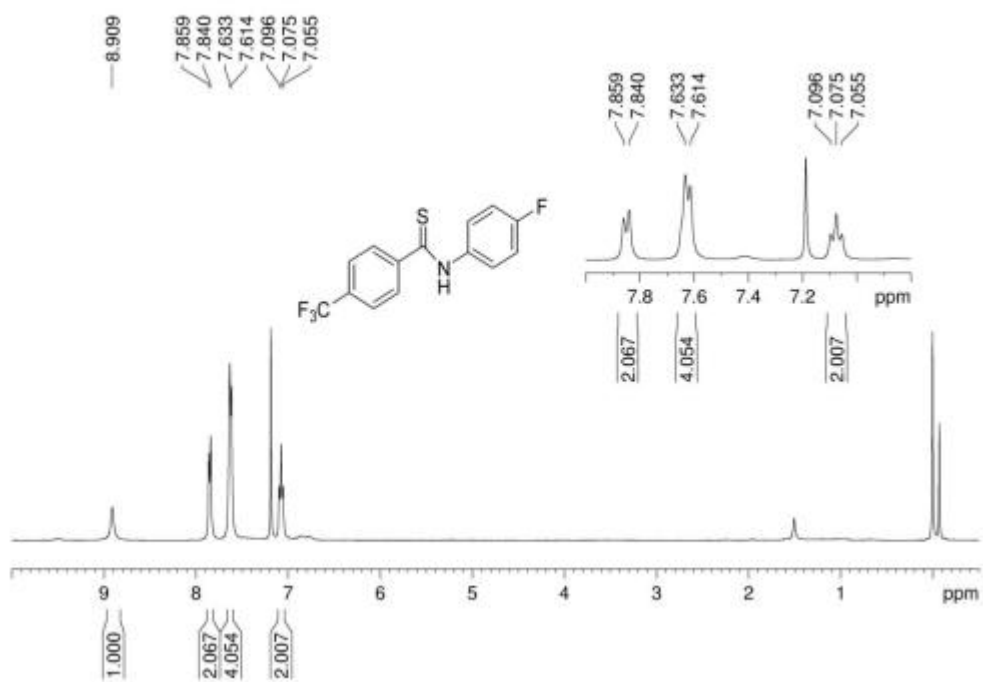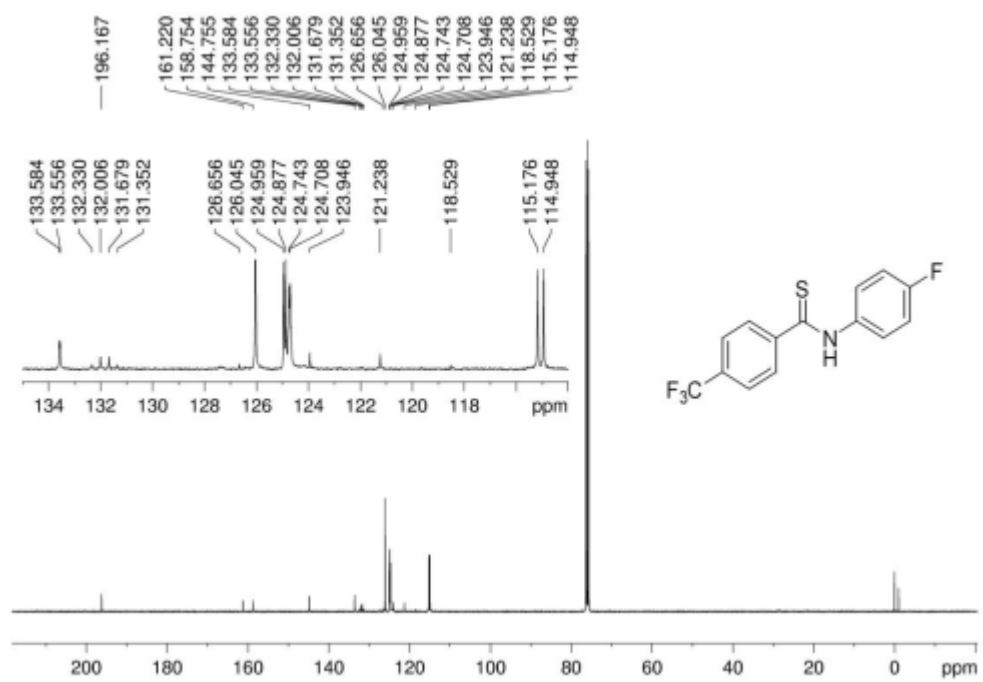



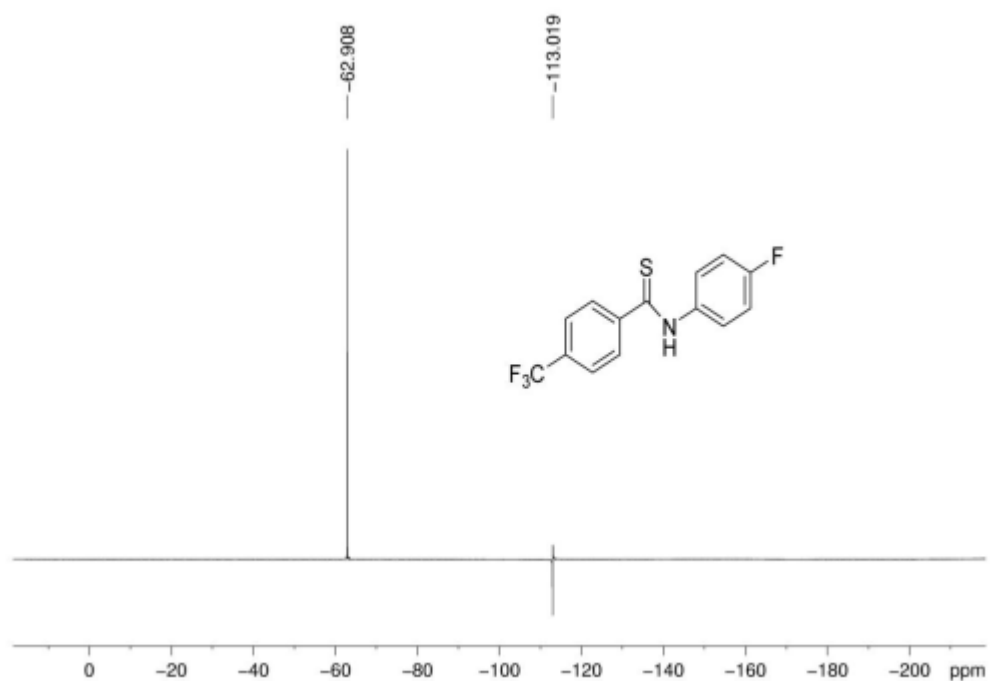

### Compound 3hn

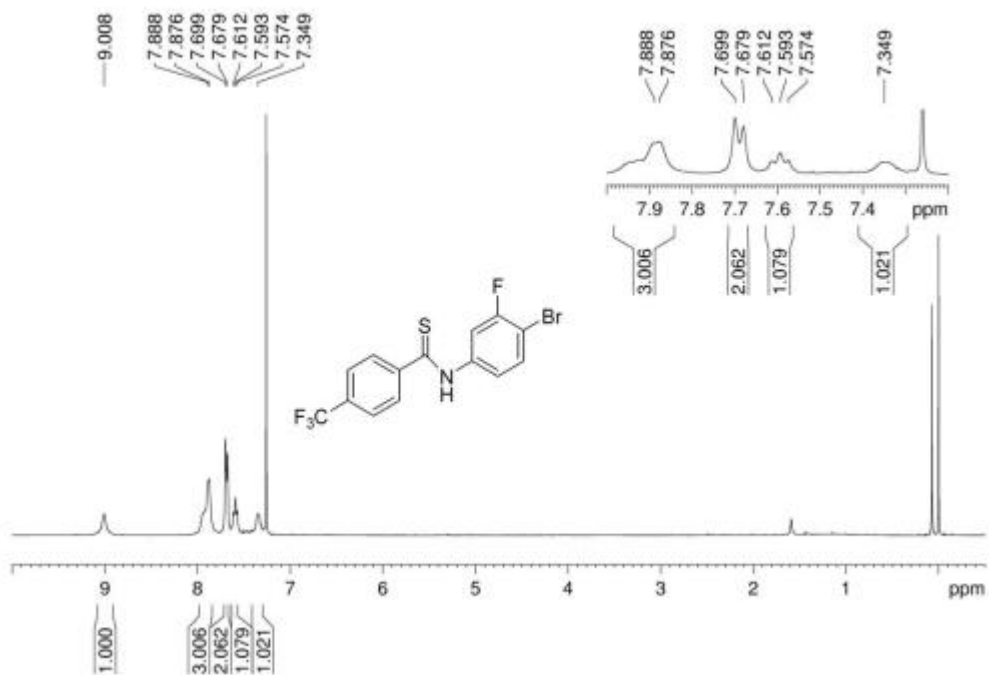

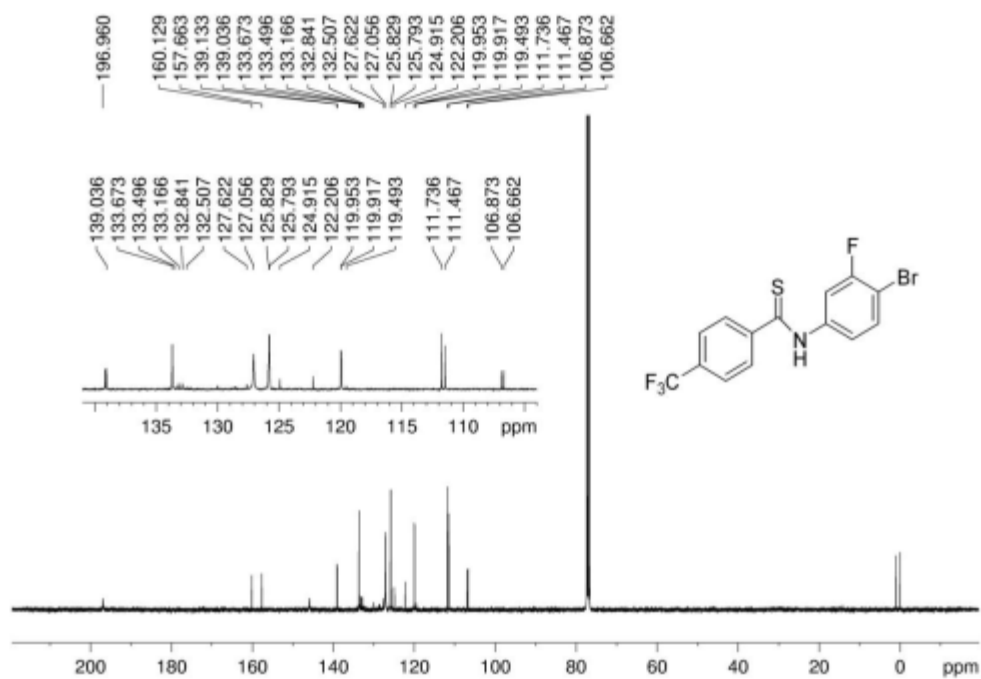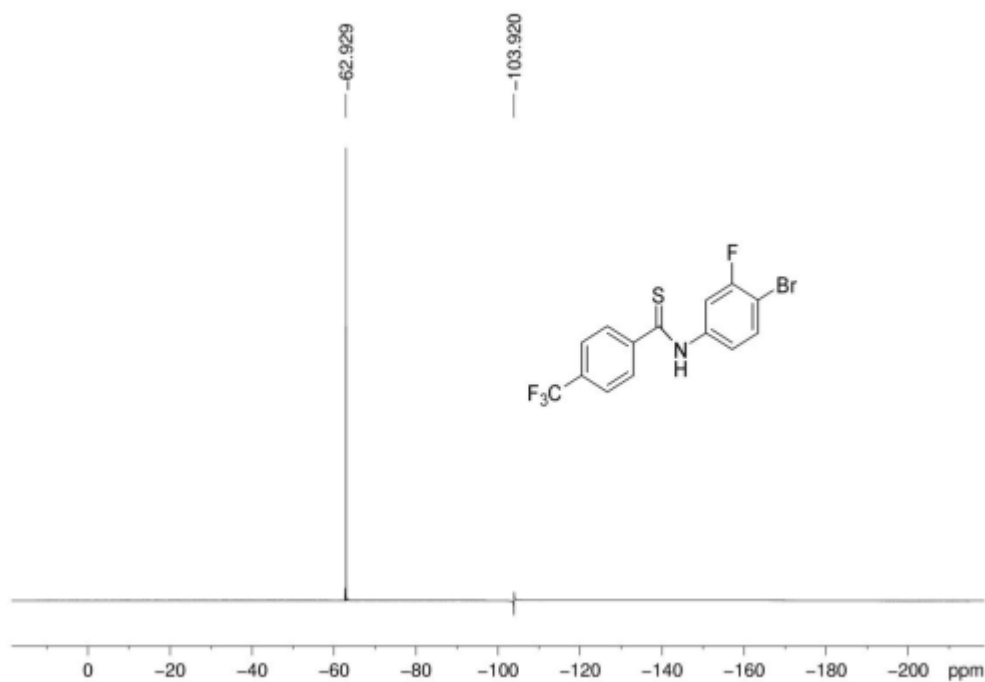

**Compound 3ho**

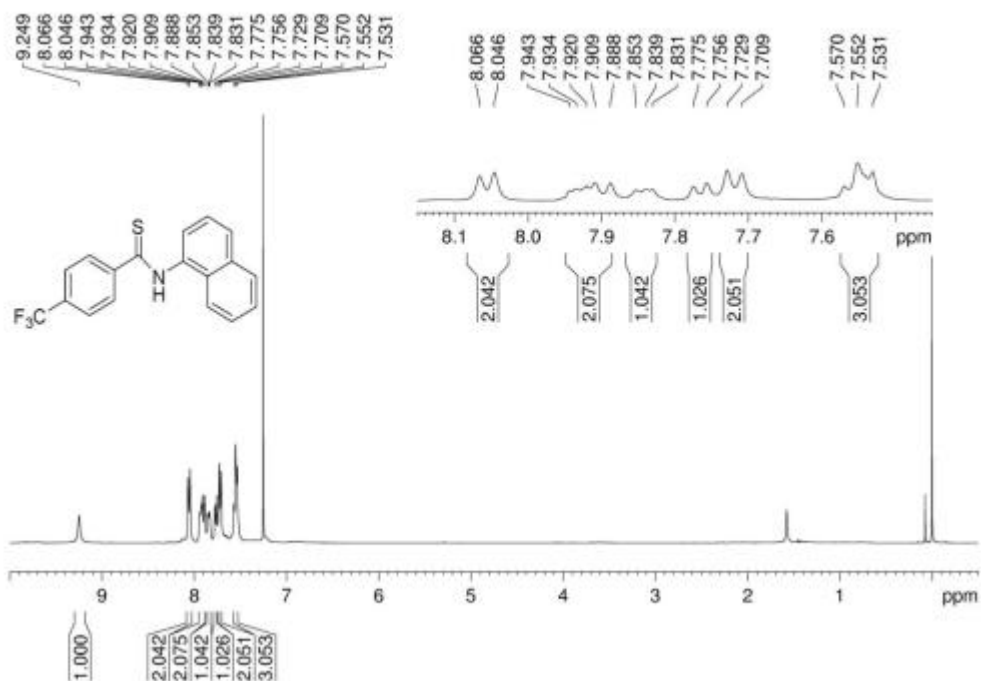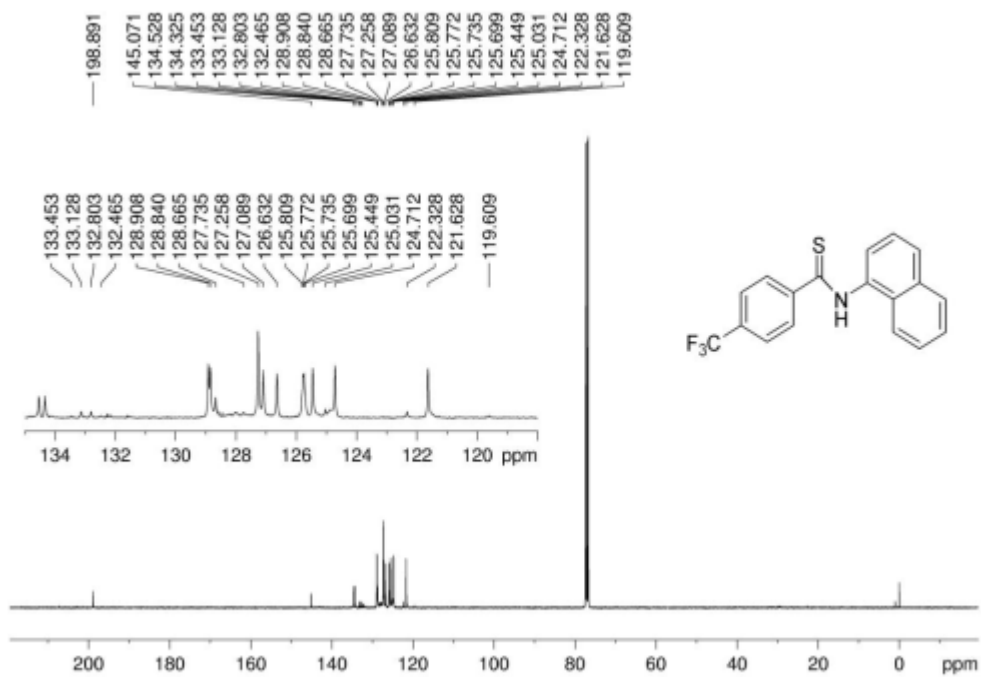

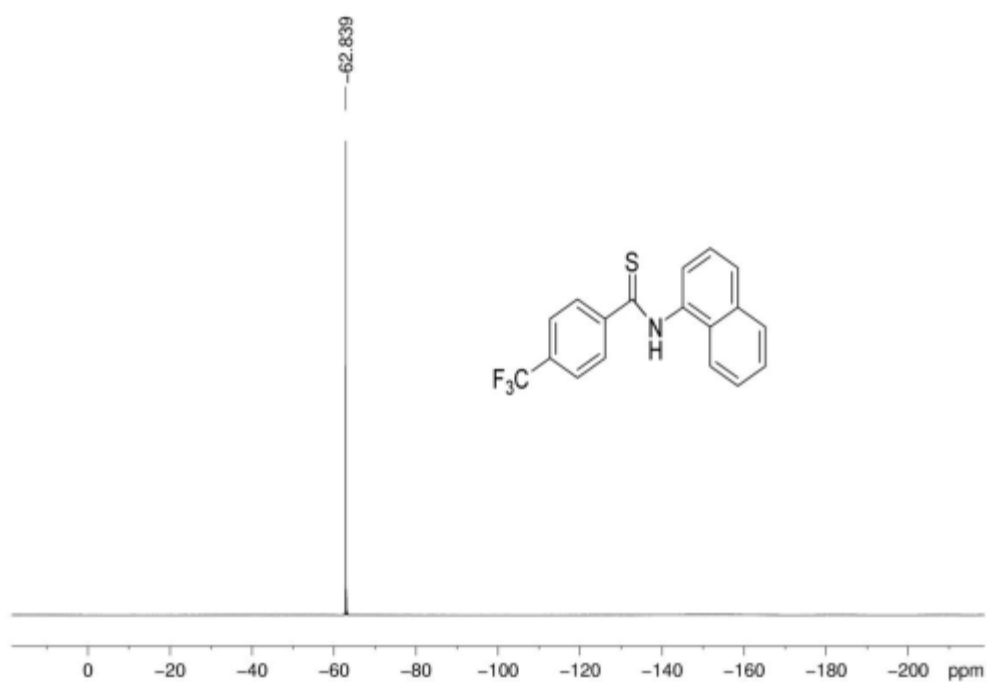

### Compound 3hp

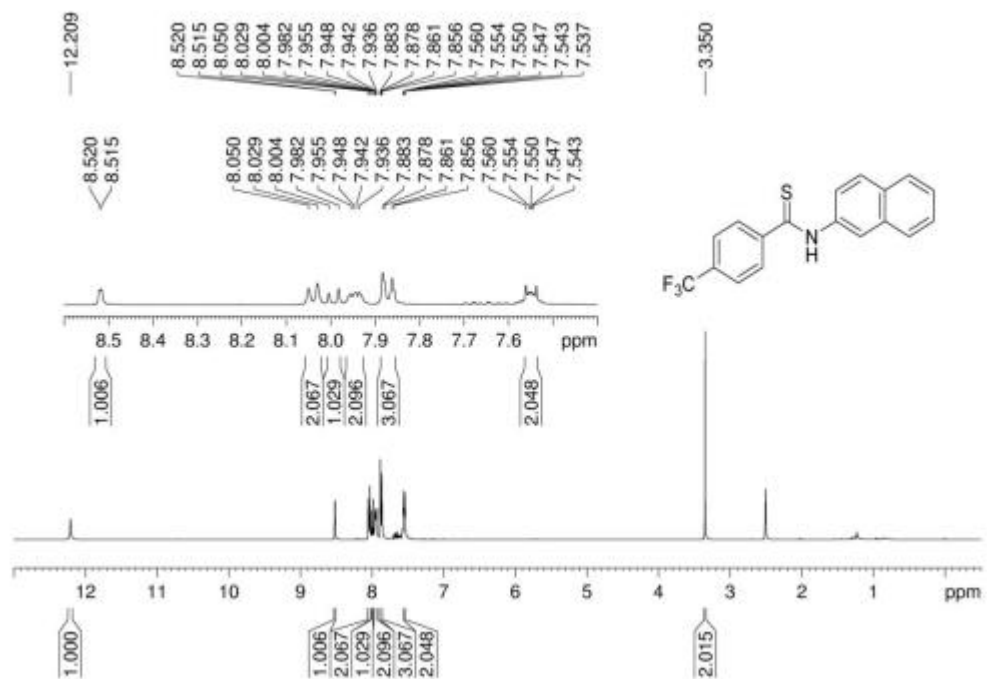

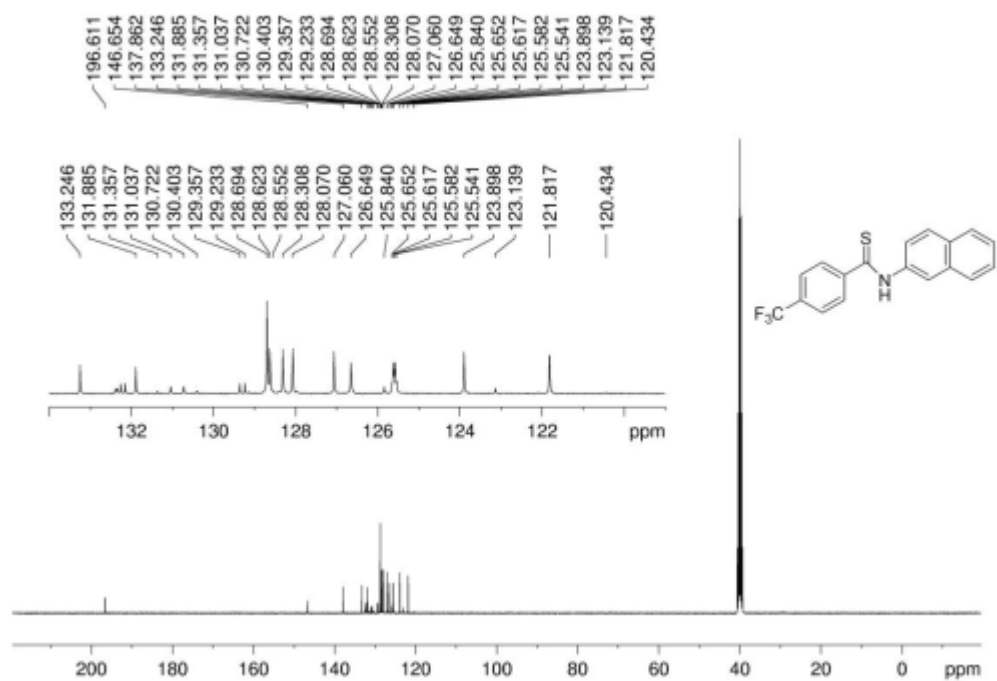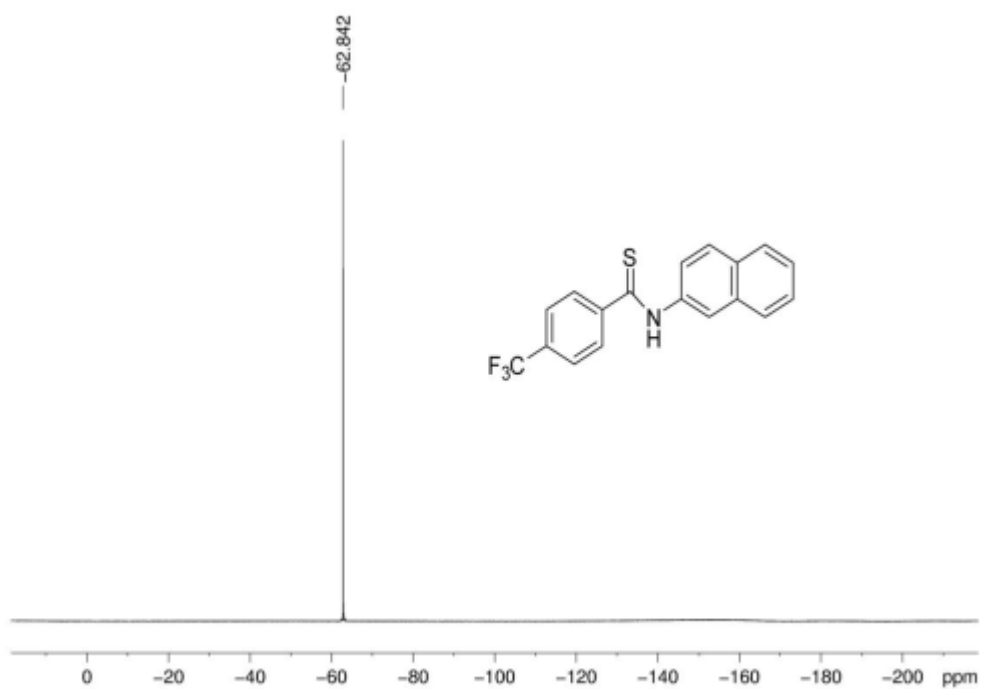

## 9. References

- [1] A. J. McKnight, B. J. Classon, *Immunology*. **1992**, 75, 286-292.
- [2] X. T. Li, Q. Pan, R. H. Hu, X. Wang, Z. Yang, S. Q. Han, *Asian J. Org. Chem.* **2016**, 5, 1353 - 1358.
- [3] K. Inamoto, K. Nozawa, Y. Kondo, *Synlett*. **2012**, 23, 1678 - 1682.
- [4] Downer-Riley, K. Nadale, Jackson, A. Yvette, *Tetrahedron*, **2008**, 64(33), 7741-7744.
- [5] Davidson, S. John, *Synthesis*. **1979**, 5, 359 - 361.
- [6] Pace, Vittorio, et al, *Chem. Eur. J.* **2015**, 21(52), 18966 -18970.
- [7] Folgueiras-Amador, A. Ana, et al, *Chem. Eur. J.* **2018**, 24(2), 487 - 491.
- [8] D. Liu, et al, *RSC Advances*. **2016**, 6(41), 34198-34203.
- [9] G. T. Zhang, et al, *J. Am. Chem. Soc.* **2015**, 137(29), 9273-9280.
- [10] K. Waisser, J. Kunes, L. Kubicova, M. Budesinsky, O. Exner, *Magnetic Resonance in Chemistry*. **1997**, 35(8), 543 - 548.
